# Supplementary material for: Targeted resequencing in epileptic encephalopathies identifies de novo mutations in CHD2 and SYNGAP1
Source: Springer Nature journal article supplement (doi:10.1038/ng.2646), 2013-05-26
Supplement: 41588_2013_BFng2646_MOESM17_ESM.pdf [file 41588_2013_BFng2646_MOESM17_ESM.pdf]

## Supporting Online Material

### Targeted resequencing in epileptic encephalopathies identifies *de novo* mutations in *CHD2* and *SYNGAP1*

Gemma L. Carvill<sup>1</sup>, Sinéad B. Heavin<sup>2</sup>, Simone C. Yendle<sup>2</sup>, Jacinta M. McMahon<sup>2</sup>, Brian J. O’Roak<sup>3</sup>, Joseph Cook<sup>1</sup>, Adiba Khan<sup>1</sup>, Michael O’ Dorschner<sup>4,5</sup>, Molly Weaver<sup>4,5</sup>, Sophie Calvert<sup>6</sup>, Stephen Malone<sup>6</sup>, Geoffrey Wallace<sup>6</sup>, Thorsten Stanley<sup>7</sup>, Ann M. E. Bye<sup>8</sup>, Andrew Bleasel<sup>9</sup>, Katherine B. Howell<sup>10</sup>, Sara Kivity<sup>11</sup>, Mark T. Mackay<sup>10, 12, 13</sup>, Victoria Rodriguez-Casero<sup>14</sup>, Richard Webster<sup>15</sup>, Amos Korczyn<sup>16</sup>, Zaid Afawi<sup>17</sup>, Nathanel Zelnick<sup>18</sup>, Tally Lerman-Sagie<sup>19</sup>, Dorit Lev<sup>19</sup>, Rikke S. Møller<sup>20</sup>, Deepak Gill<sup>15</sup>, Danielle M. Andrade<sup>21</sup>, Jeremy L. Freeman<sup>10, 12</sup>, Lynette G. Sadleir<sup>7</sup>, Jay Shendure<sup>3</sup>, Samuel F. Berkovic<sup>2</sup>, Ingrid E. Scheffer<sup>2,10, 13,22\*</sup>, Heather C. Mefford<sup>1\*</sup>

#### Affiliations

1. Division of Genetic Medicine, Department of Pediatrics, University of Washington, Seattle, Washington, 98195, USA
2. Epilepsy Research Centre, Department of Medicine, University of Melbourne, Austin Health, Melbourne, Victoria, Australia
3. Department of Genome Sciences, University of Washington, Seattle, Washington, 98195, USA
4. Department of Psychiatry & Behavioral Sciences, University of Washington, Seattle, Washington, 98195, USA
5. Veteran Affairs Puget Sound Health Care System, Seattle, WA 98108, USA
6. Neurosciences Children’s Health Queensland, Royal and Mater Children’s Hospitals, Brisbane, Queensland, Australia
7. Department of Paediatrics, School of Medicine and Health Sciences, University of Otago, Wellington, New Zealand
8. Department of Paediatric Neurology, University of New South Wales, Sydney Children’s Hospital, Sydney, New South Wales, Australia
9. Westmead Hospital, University of Sydney, Sydney, New South Wales, Australia
10. Department of Neurology, The Royal Children’s Hospital, Parkville, Melbourne, Victoria, Australia
11. Epilepsy Unit, Schneider Children’s Medical Center of Israel, Petach Tikvah, Israel
12. Critical Care & Neurosciences Theme, Murdoch Childrens Research Institute, Melbourne, Victoria, Australia
13. Department of Paediatrics, The University of Melbourne, The Royal Children’s Hospital, Melbourne, Victoria, Australia
14. Paediatric Neurology, Monash Medical Centre, Melbourne, Victoria, Australia
15. TY Nelson Department of Neurology, The Children’s Hospital at Westmead, Sydney, New South Wales, Australia
16. Department of Neurology, Tel-Aviv University, Tel-Aviv, Israel
17. Tel-Aviv University Medical School, Tel-Aviv, Israel
18. Department of Pediatrics, Carmel Medical Center, Technion Faculty of Medicine, Haifa, Israel

19. Metabolic-Neurogenetic Service, Wolfson Medical Center, Holon, and Sackler School of Medicine, Tel-Aviv University, Tel-Aviv, Israel
20. Danish Epilepsy Centre, Dianalund, Denmark
21. Division of Neurology, Department of Medicine, University of Toronto, Toronto Western Hospital, Krembil Neurosciences Program. Toronto, Canada
22. Florey Institute, Melbourne, Victoria, Australia

\* To whom correspondence should be addressed:

Heather C. Mefford, [hmefford@uw.edu](mailto:hmefford@uw.edu);

Ingrid E. Scheffer, [scheffer@unimelb.edu.au](mailto:scheffer@unimelb.edu.au)

## Table of contents

**Supplementary Figure 1** Targeted resequencing strategy carried out in 500 patients with epileptic encephalopathy.

**Supplementary Figure 2** Percentage of each target gene resequenced at >25X

**Supplementary Figure 3** Microdeletions of the 15q26.1 region encompassing *CHD2*

**Supplementary Figure 4** The p.Y805X *HNRNPU* variant in proband T162

**Supplementary Figure 5** Pedigrees of segregating variants in known epileptic encephalopathy genes

**Supplementary Table 1** Potentially disruptive variants in known epileptic encephalopathy genes

**Supplementary Note:** Candidate gene selection from epilepsy-associated CNVs

**Supplementary Table 2** Candidate gene selection details

**Supplementary Table 3** Details of molecular inversion probes used to capture 65 target genes

**Supplementary References**

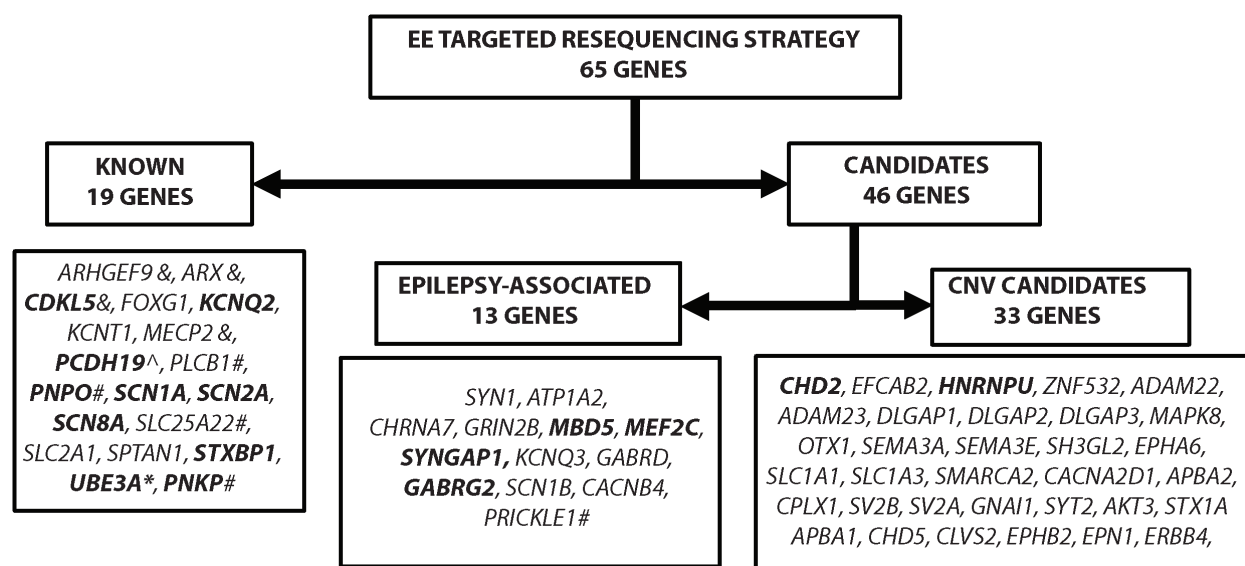

**Supplementary Figure 1 Targeted resequencing strategy carried out in 500 patients with epileptic encephalopathy.** Disease gene identification was conducted under a *de novo*/dominant inheritance model, except for #recessive, &X-linked recessive, ^X-linked but female restricted and \*disruption of maternally expressed (paternally imprinted) genes. Genes in which we identified pathogenic variants appear in bold.

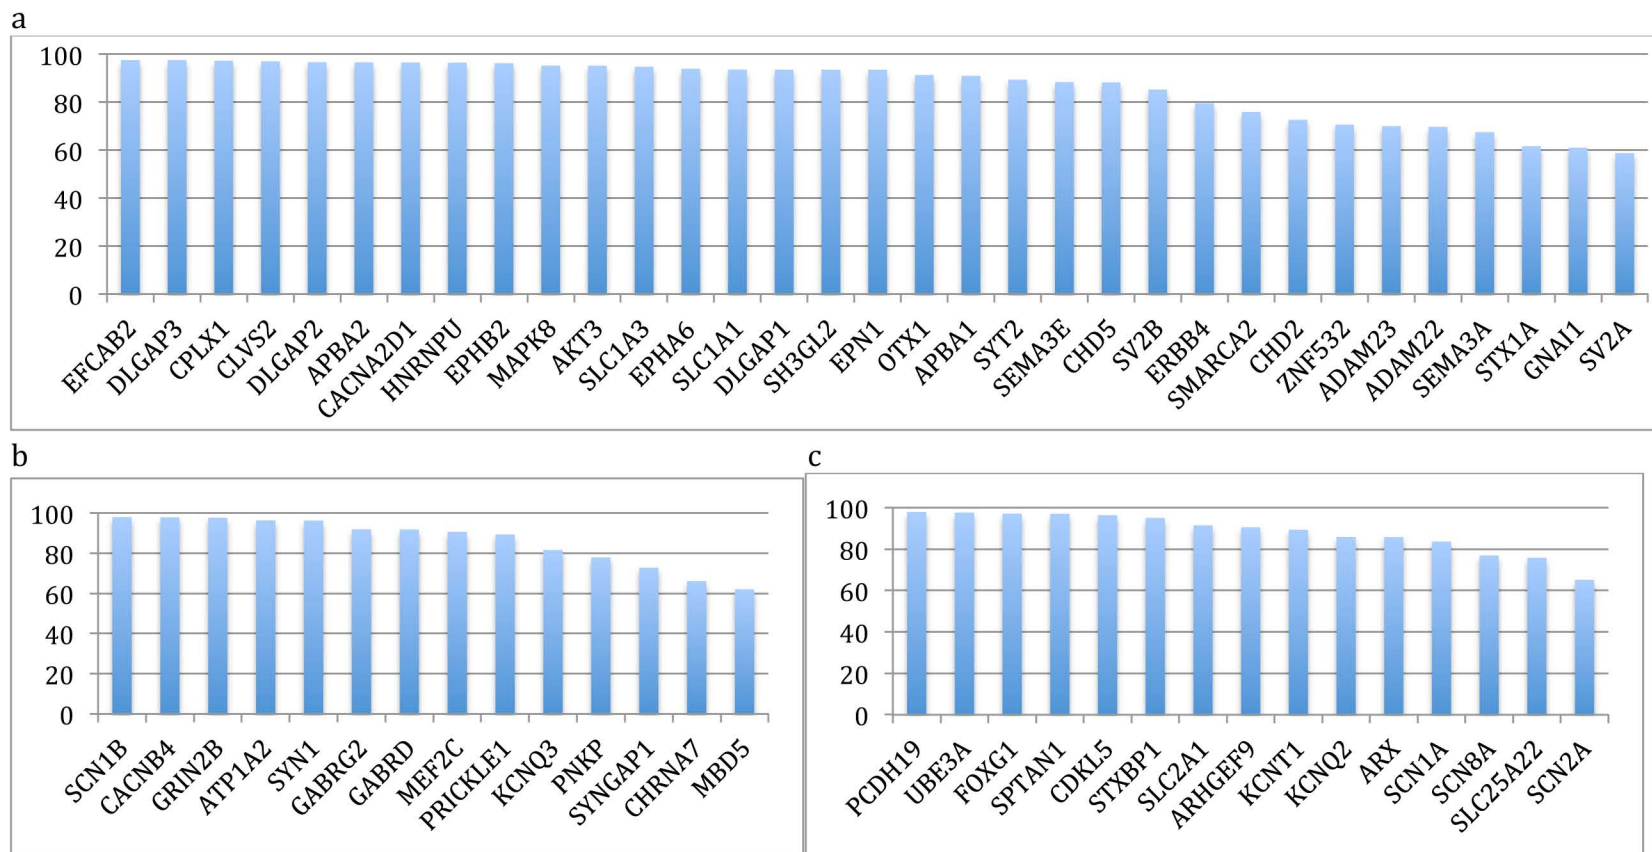

**Supplementary Figure 2** Percentage of target gene resequenced at >25X for a) CNV candidate genes b) epilepsy-associated genes and c) known epileptic encephalopathy genes. GATK Depth of Coverage tool was used to calculate the percentage of exonic bases (and 5bp flanking) covered at >25X in each sample for each gene. The average coverage across all samples is reported.

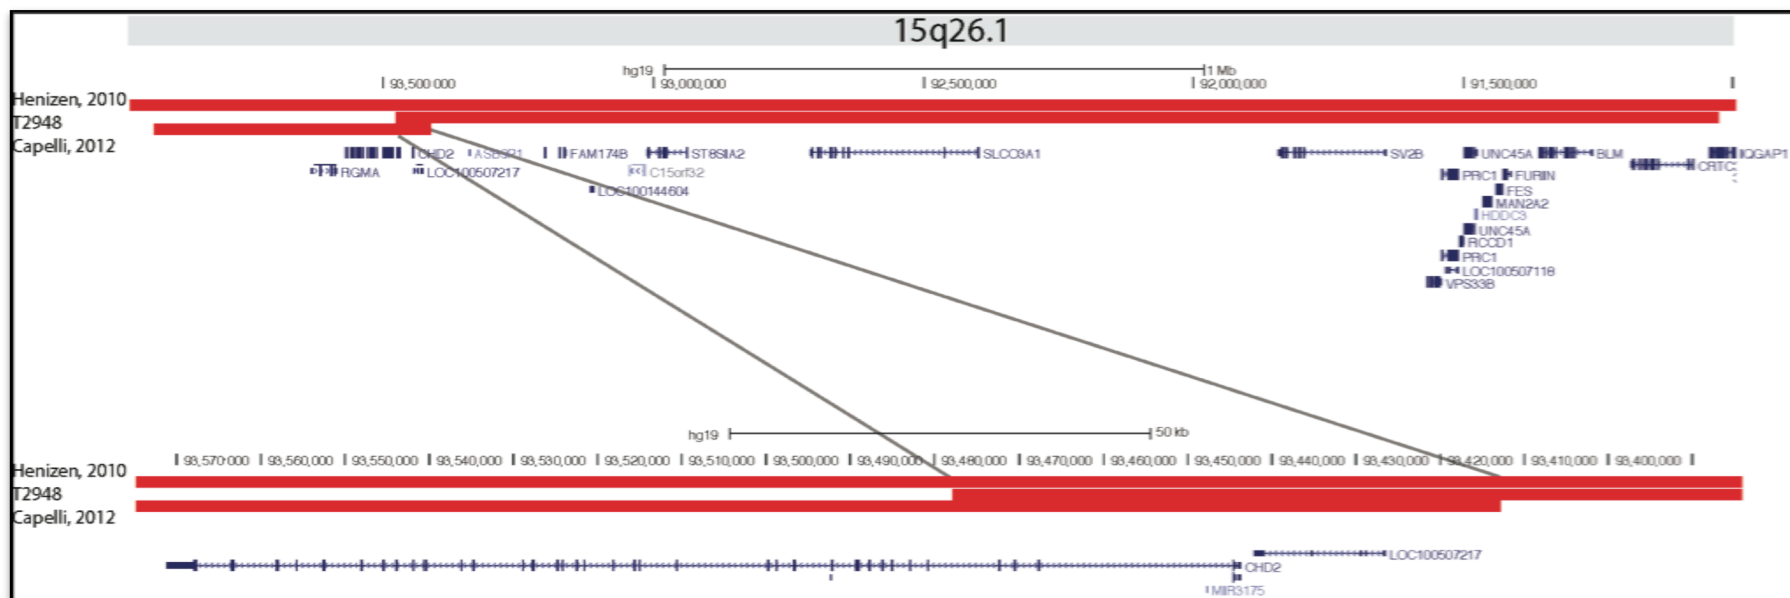

**Supplementary Figure 3** Microdeletions of the 15q26.1 region encompassing *CHD2*. The *CHD2* gene and a uncharacterized non-coding RNA (LOC100507217) were the only two genes common to the two previously reported 15q26del in probands with EE<sup>1,2</sup>, as well as the unpublished deletion we identified in a proband (T2948) with photosensitive generalized early-onset epilepsy and ID. *CHD2* was selected as a candidate gene for mutation screening in our cohort of 500 epileptic encephalopathy probands.

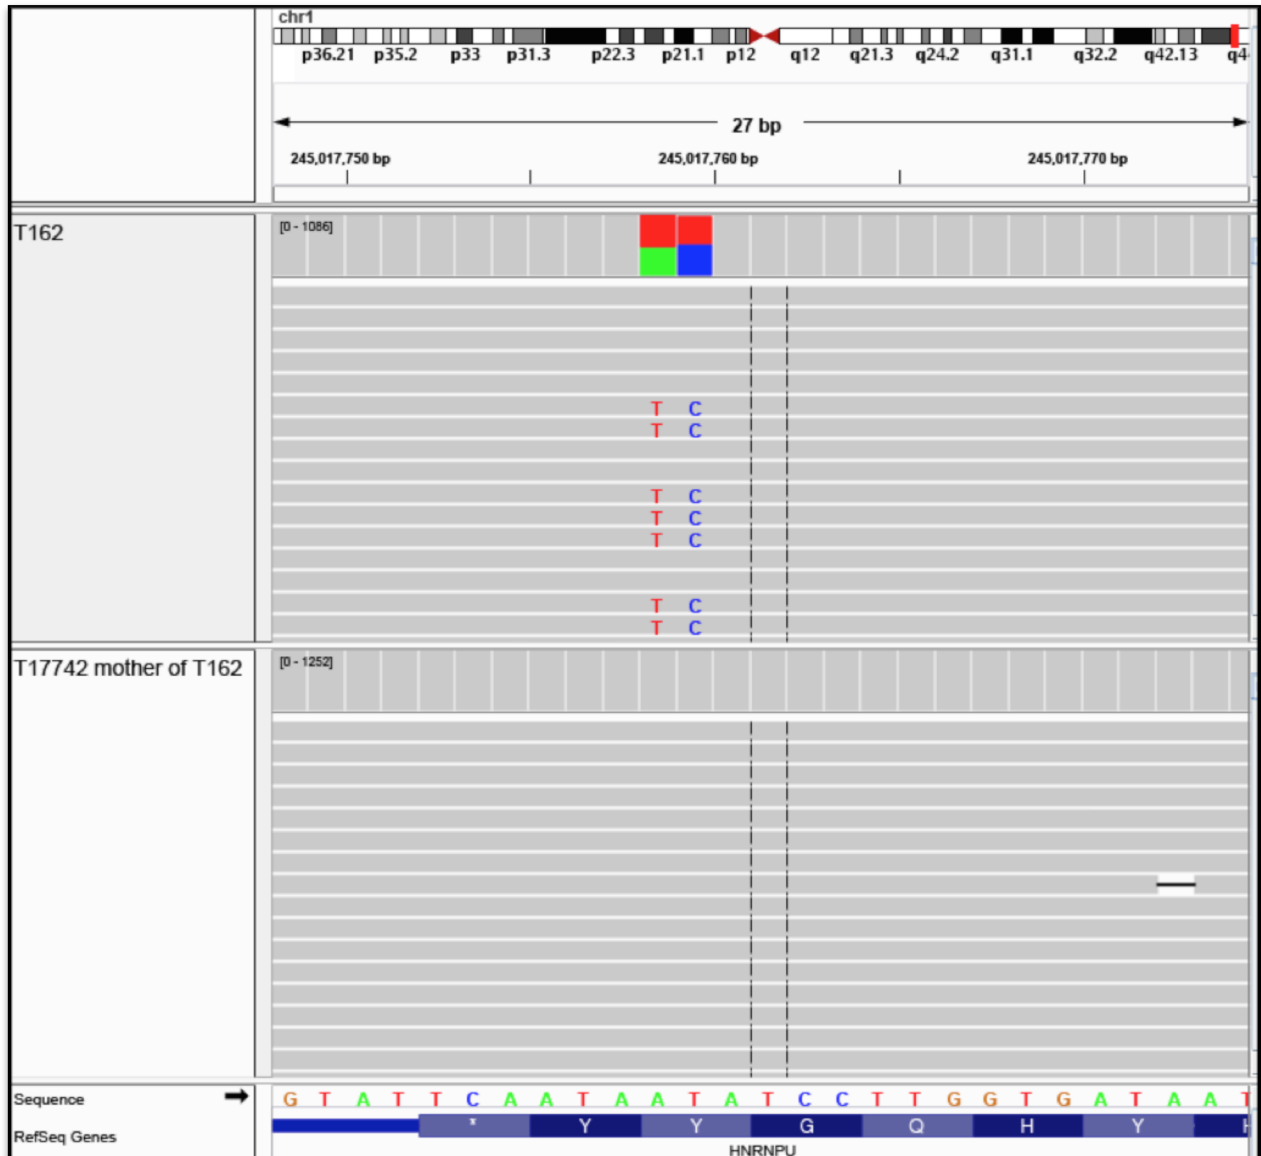

**Supplementary Figure 4** The p.Y805X *HNRNPU* variant in proband T162. Output from the Integrated Genome Viewer (IGV) shows the c.471T>C and c.472A>T in the proband, T162 (top panel). Neither variant was present in the proband's mother T17742 (bottom panel).

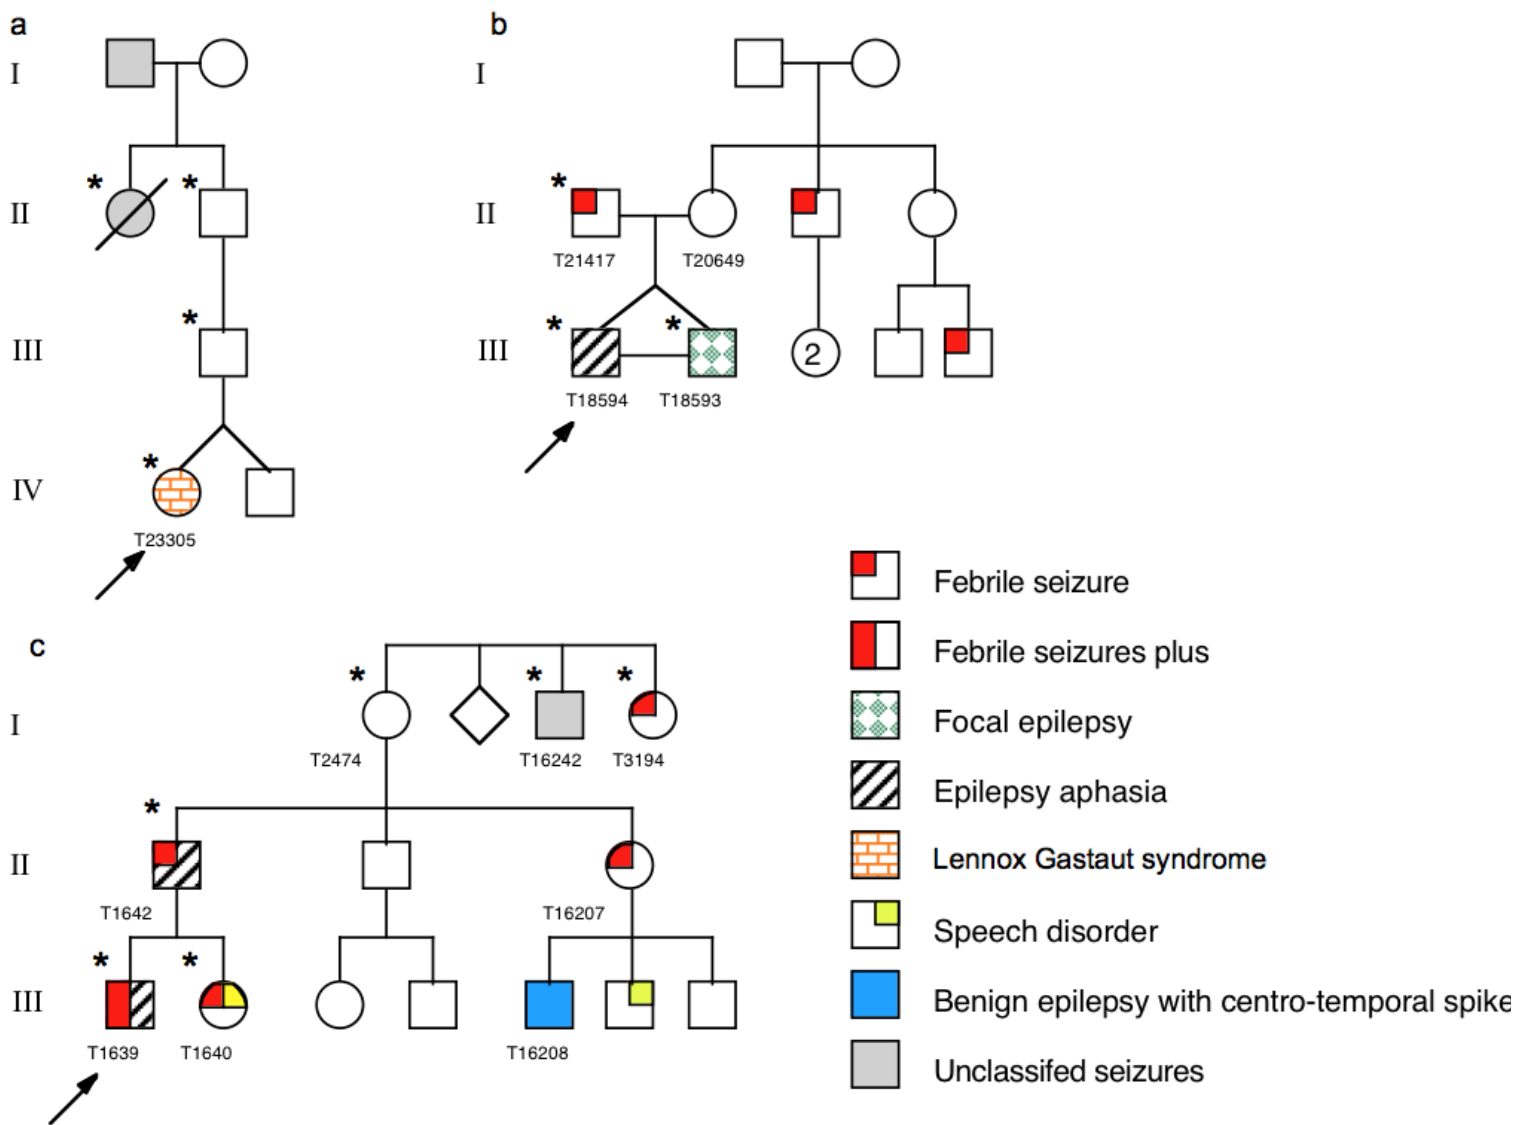

**Supplementary Figure 5** Pedigrees of segregating variants in known EE genes. a) The pedigree showing the *PCDH19* Arg911Gln mutation resulting in the LGS phenotype in the proband and developmental delay and seizures in her paternal great-aunt. Carrier males exhibit no phenotype, as expected for *PCDH19* mutations that cause epilepsy phenotypes in females only. b) The *SCN1A* Asp454Asn variant present in affected monozygotic twins as well as their father with febrile seizures. c) The Arg1988Trp *SCN1A* change in a proband with epilepsy aphasisia and febrile seizures plus; the variant segregates with various types of epilepsy with variable expressivity and incomplete penetrance.



**Supplementary Table 1** Potentially disruptive variants in known epileptic encephalopathy genes.

| Proband | Gene         | Position       | REF/ALT | c.DNA change | Amino acid change | Inheritance |
|---------|--------------|----------------|---------|--------------|-------------------|-------------|
| T22652  | <i>CDKL5</i> | chrX:18622785  | C/T     | c.1741C>T    | HIS581TYR         | Unk*        |
| T17329  | <i>CDKL5</i> | chrX:18646566  | C/T     | c.2572C>T    | ARG858CYS         | Unk*        |
| T24019  | <i>KCNQ2</i> | chr20:62070961 | G/A     | c.917G>A     | ALA306VAL         | Unk#        |
| T23039  | <i>KCNQ2</i> | chr20:62046399 | T/G     | c.1298T>G    | GLN461PRO         | Unk*        |
| T2542   | <i>KCNT1</i> | chr9:138678206 | G/A     | c.3341G>A    | ARG1114GLN        | Unk*        |
| T16275  | <i>KCNT1</i> | chr9:138677157 | C/A     | c.3158C>A    | PRO1053HIS        | Unk*        |
| T17135  | <i>KCNT1</i> | chr9:138662266 | C/T     | c.1742C>T    | THR581ILE         | Unk*        |
| T2509   | <i>SCN1A</i> | chr2:166929953 | T/C     | c.179T>C     | ASN60SER          | Unk*        |
| T21732  | <i>SCN1A</i> | chr2:166848590 | G/A     | c.519G>A     | PRO1732LEU        | Unk*        |
| T2529   | <i>SCN1A</i> | chr2:166894315 | T/C     | c.291T>C     | MET973VAL         | Unk*        |
| T22294  | <i>SCN1A</i> | chr2:166909406 | G/A     | c.650G>A     | THR217ILE         | Unk*        |
| T21746  | <i>SCN1A</i> | chr2:166848407 | G/A     | c.945G>A     | THR1793ILE        | Unk*        |
| T23947  | <i>SCN1A</i> | chr2:166900370 | G/A     | c.1852G>A    | ARG618CYS         | Unk*        |
| T2657   | <i>SCN8A</i> | chr12:52115678 | C/T     | c.1984C>T    | ARG662CYS         | Unk#        |
| T20187  | <i>SCN8A</i> | chr12:52200885 | G/A     | c.5492G>A    | ARG1831GLN        | Unk*        |
| T2596   | <i>UBE3A</i> | chr15:25601062 | G/C     | c.2110G>C    | PRO704ALA         | Unk*        |

# father or \* neither parent available for segregation analysis

**Supplementary Note:** Candidate gene selection from epilepsy-associated CNVs

We considered all genes encompassed by 138 unique epilepsy-associated CNVs either from published cohorts, case reports or unpublished data<sup>2-4</sup>. These CNVs encompassed 1309 genes, we selected only those that were expressed in the brain (n=705). These 705 'candidate genes' were prioritized based on a number of criteria. Firstly, we compared overlapping CNVs, and defined a critical interval. For a small number of genomic regions, only one or two genes were encompassed by the overlapping intervals, and these were prioritized (n=4) (Sup Table 2) . Over larger genomic intervals that were not amenable to mapping, we performed a thorough literature search of genes in the region and applied bioinformatics tools for candidate gene prioritization, using the bioinformatics tools, ToppGene Suite<sup>5</sup>, Endeavour<sup>6</sup>, String<sup>7</sup> and the Ingenuity Pathway Analysis software (IPA) (see URLs). The ToppGene and Endeavour tools were used to rank candidate genes based on similarity to a training set of known epilepsy genes (n=115, see list below) using default settings. The ToppNet tool, was used to rank candidate genes based on relationships to a protein-protein interaction networks, also generated from the training set of genes. String was used to generate protein-protein interaction networks between the candidate and training set genes, using a high confidence threshold (0.700). Similarly, pathway analysis was conducted using IPA, with both sets of genes. Candidate genes that were consistently ranked as 'high priority' by ranking tools and/or those that were enriched within protein-protein interaction networks and canonical pathways were prioritized. Furthermore, we performed an intersection between candidate genes and those within the Mouse Genome Informatics (MGI) database that were known to generate phenotypes affecting the 'nervous system'. Finally, genes with a high burden of truncating variants in the ESP6500 (see URLs) control dataset were not selected. Using this tiered prioritization strategy, a total of 18 genes were selected for targeted resequencing. We also selected five genes that were members of the same gene family as a CNV candidate gene (homology to CNV candidate). Finally, literature searches resulted in the inclusion of six additional genes that were hypothesized as candidate genes based on function and/or animal models (literature candidate).

ToppGene Suite :<http://toppgene.cchmc.org/>

Endeavour: <http://homes.esat.kuleuven.be/~bioiuser/endeavour/index.php>

String: <http://string-db.org/>

MGI: [http://www.informatics.jax.org/searches/allele\\_form.shtml](http://www.informatics.jax.org/searches/allele_form.shtml)

**List of training set genes:** *ABAT, ABCC8, ABCD1, ACOX1, ADSL, AGTR2, ALDH3A2, ALDH4A1, ALDH5A1, ALDH7A1, ALG12, ALG2, ALG6, AMT, ARG1, ARHGEF9, ARX, ATN1, ATP1A2, ATP6, ATP6AP2, ATP7A, ATRX, BRD2, C3, CACNA1A, CACNA1H, CACNB4, CASR, CDKL5, CHRNA2, CHRNA4, CHRN2, CLCN2, CLN3, CLN8, CRH, CSTB, D2HGDH, DCX, EFHC1, ELP4, EPM2A, FLNA, FMR1, GABRA1, GABRD, GABRG2, GDI1, GFAP, GK, GPR98, GRIA3, GRIN2A, GRIN2B, HCN1, HCN2, IDS, IMPA2, KCNA1, KCNJ11, KCNMA1, KCNQ2, KCNQ3, KCTD7, KDM5C, LGI1, LGI2, MAGI2, ME2, MECP2, MED12, MEF2C, NHLRC1, OPHN1, OTC, PCDH19, PDHA1, PGK1, PHF6, PLCB1, POLG, PRICKLE1, RELN, SCARB2, SCN1A, SCN1B, SCN2A, SCN9A, SERPINI1, SEZ6, SHROOM4, SLC25A22, SLC2A1, SLC6A8, SLC9A9, SMC1A, SMS, SPTAN1, SRPX2, ST3GAL5, STRADA, STXBP1, SYN1, SYP, TBC1D24, TCF4, TRNK, TRNS1, TSC1, TSC2, TUBA1A, UBE3A, YWHAE, ZEB2*

**Supplementary Table 2** Candidate gene selection details

|     | <b>Gene</b>     | <b>Genomic Location</b> | <b>CNV Type</b> | <b>Rationale</b>                      | <b>References</b> |
|-----|-----------------|-------------------------|-----------------|---------------------------------------|-------------------|
| 1.  | <i>CHD2</i>     | 15q26.1                 | Del             | Critical interval                     | 1-3               |
| 2.  | <i>EFCAB2</i>   | 1q44                    | Del             | Critical interval                     | 3                 |
| 3.  | <i>HNRNPU</i>   | 1q44                    | Del             | Critical interval                     | 3, 8              |
| 4.  | <i>ZNF532</i>   | 18q21.32                | Del             | Only gene in interval                 | Unpublished       |
| 5.  | <i>ADAM22</i>   | 7q21.12                 | Del             | ToppNett, IPA, MGI                    | 2                 |
| 6.  | <i>ADAM23</i>   | 2q33.3                  | Del             | Endeavour, IPA, MGI                   | 3                 |
| 7.  | <i>DLGAP1</i>   | 18p11.31                | Del             | ToppNett, String                      | 2                 |
| 8.  | <i>DLGAP2</i>   | 8p23.3                  | none            | Homology to CNV candidates            |                   |
| 9.  | <i>DLGAP3</i>   | 1p34.3                  | Dup             | ToppNett, String                      | Unpublished       |
| 10. | <i>MAPK8</i>    | 10q11.22                | Del             | ToppNett, String, MGI                 | 2                 |
| 11. | <i>OTX1</i>     | 2p15                    | Del             | Literature candidate                  | 3                 |
| 12. | <i>SEMA3A</i>   | 7q21.11                 | Del             | IPA, MGI                              | 2                 |
| 13. | <i>SEMA3E</i>   | 7q21.11                 | Del             | IPA, MGI                              | 2, 3              |
| 14. | <i>SH3GL2</i>   | 9p22.2                  | Del/Dup         | Endeavour, ToppNett, String           | Unpublished       |
| 15. | <i>EPHA6</i>    | 1q44                    | Del/Dup         | String, IPA                           | 2, 3              |
| 16. | <i>SLC1A1</i>   | 9q24.2                  | Del             | ToppGene, Endeavour                   | 2, 3              |
| 17. | <i>SLC1A3</i>   | 5p13.2                  | Del             | ToppGene, Endeavour                   | 3                 |
| 18. | <i>SMARCA2*</i> | 9q24.3                  | Del/Dup         | Endeavour, ToppNett, String           | 2, 3              |
| 19. | <i>CACNA2D1</i> | 7q21.1                  | Del             | ToppGene, Endeavour, String           | 2, 3              |
| 20. | <i>APBA2</i>    | 15q13.1                 | Del             | String, TopNett, MGI, Endeavour       | 3                 |
| 21. | <i>CPLX1</i>    | 4p16.3                  | Del             | ToppGene                              | 3                 |
| 22. | <i>SV2B</i>     | 15q26.1                 | Del             | ToppGene, Endeavour                   | 2, 3              |
| 23. | <i>SV2A</i>     | 1q21.2                  | none            | Homology to CNV candidates            |                   |
| 24. | <i>GNAI1</i>    | 7q21.11                 | Del             | ToppNett, String, MGI, IPA, Endeavour | 2, 3              |
| 25. | <i>SYT2</i>     | 1q32.1                  | Dup             | MGI                                   | 3                 |
| 26. | <i>AKT3</i>     | 1q44                    | Del             | Candidate from literature             | 9                 |
| 27. | <i>APBA1</i>    | 9q21.11                 |                 | Homology to CNV candidates            |                   |
| 28. | <i>CHD5</i>     | 1p36.31                 | Del             | Homology to CNV candidates            |                   |
| 29. | <i>CLVS2</i>    | 6p22.31                 |                 | Literature candidate                  | 10                |
| 30. | <i>EPHB2</i>    | 1p36.12                 |                 | Homology to CNV candidates            | 11                |
| 31. | <i>EPN1</i>     | 9q13.42                 |                 | Literature candidate                  | 12                |
| 32. | <i>ERBB4</i>    | 2q34                    |                 | Literature candidate                  | 13                |
| 33. | <i>STX1A</i>    | 7q11.23                 |                 | Literature candidate                  | 14                |

IPA, Ingenuity Pathway Analysis software; MGI, Mouse Genome Informatics

\*SMARCA2 mutations have since been shown to cause Nicolaides Baraitser syndrome<sup>15</sup>, SMARCA2 was selected as a CNV candidate gene prior to this publication. Similarly mutations in AKT3 have been shown to cause hemimegalencephaly<sup>16</sup>.

## Supplementary Table 3 Details of molecular inversion probes used to capture 65 target genes

| MIP_name | 70 mer sequence                                                        |
|----------|------------------------------------------------------------------------|
| GABRD_2  | cggggctccgcgcaaaacttggctcCTTCAGCTTCCCGATATCCGACGGTAGTGTcaccgccccgacccc |
| GABRD_1  | cgcggggtcggggcggtggCTTCAGCTTCCCGATATCCGACGGTAGTGTtagccaagtgtgcccggacc  |
| GABRD_3  | gctacgcccgaacttccggCTTCAGCTTCCCGATATCCGACGGTAGTGTtggaaataaataagtct     |
| GABRD_4  | gctatcagccgtccaggttggCTTCAGCTTCCCGATATCCGACGGTAGTGTgcttagagccagcctac   |
| GABRD_5  | catggtaggtgccaccagcctctCTTCAGCTTCCCGATATCCGACGGTAGTGTggtccatctgtggctcc |
| GABRD_6  | gcctctgagatgtggtcgatCTTCAGCTTCCCGATATCCGACGGTAGTGTgtgtactcctgtggaggtg  |
| GABRD_7  | gtggctgcccgaacactctcCTTCAGCTTCCCGATATCCGACGGTAGTGTcggcccctgtccacctc    |
| GABRD_8  | ccagggtctcgttgggtggttCTTCAGCTTCCCGATATCCGACGGTAGTGTgatcacgctgtcgggc    |
| GABRD_9  | gaaaagctcgagcggctctgcCTTCAGCTTCCCGATATCCGACGGTAGTGTagaacaagctaccggc    |
| GABRD_11 | gaggccagcctcccgaagcCTTCAGCTTCCCGATATCCGACGGTAGTGTacaccactcacagctctc    |
| GABRD_10 | ggggcttccagcagtgatgCTTCAGCTTCCCGATATCCGACGGTAGTGTcactgcatctgtctct      |
| GABRD_13 | gctctccgaccagtagtagcCTTCAGCTTCCCGATATCCGACGGTAGTGTggcacatgcccgaagg     |
| GABRD_12 | gttcaccatcaccagctaccCTTCAGCTTCCCGATATCCGACGGTAGTGTcggggcaggccggctctg   |
| GABRD_14 | caatctacatgccctcctcCTTCAGCTTCCCGATATCCGACGGTAGTGTcctgagtcctatggttg     |
| GABRD_15 | cagggtgaagtgcaggctgagcCTTCAGCTTCCCGATATCCGACGGTAGTGTgaggccccctacagag   |
| GABRD_16 | ggggctcagcactggcctctgCTTCAGCTTCCCGATATCCGACGGTAGTGTgtcctggctctctctg    |
| GABRD_18 | atcgtcagaccgtggtgatgCTTCAGCTTCCCGATATCCGACGGTAGTGTgaaatgagcaaggcgt     |
| GABRD_17 | aaggcactggaactctctctgCTTCAGCTTCCCGATATCCGACGGTAGTGTgagggggcggctgag     |
| GABRD_19 | gccagggacagcactctgaCTTCAGCTTCCCGATATCCGACGGTAGTGTatctgtatgtctctgtt     |
| GABRD_20 | gccagggacagcactctgCTTCAGCTTCCCGATATCCGACGGTAGTGTatctgtatgtctctgtt      |
| GABRD_22 | cagcagagagggagaagggacaaCTTCAGCTTCCCGATATCCGACGGTAGTGTtctgagcggctgcc    |
| GABRD_21 | acctgatgggctcctacaggtcCTTCAGCTTCCCGATATCCGACGGTAGTGTcagccctgtctccc     |
| GABRD_23 | gttgcggcgtcaatgtcctcCTTCAGCTTCCCGATATCCGACGGTAGTGTgggtggagacagggaga    |
| GABRD_24 | agcgcggcgtaaatgtcaCTTCAGCTTCCCGATATCCGACGGTAGTGTcttctccaggaattct       |
| CHD5_499 | cgagactcctctgttgcaCTTCAGCTTCCCGATATCCGACGGTAGTGTatgtgaccgtagtgccc      |
| CHD5_500 | gtacatctgggaggagcgaagcCTTCAGCTTCCCGATATCCGACGGTAGTGTcaccctgtgatgc      |
| CHD5_501 | gcaacaacttgggccaactctcCTTCAGCTTCCCGATATCCGACGGTAGTGTctcggctgtgtgcc     |
| CHD5_503 | ggctcagatgtcggagcgcCTTCAGCTTCCCGATATCCGACGGTAGTGTcatcctgtcctaccatc     |
| CHD5_502 | gcagccgggtcacgtggcctcCTTCAGCTTCCCGATATCCGACGGTAGTGTggggcacacagccgagc   |
| CHD5_504 | cagggtgtggtgctctcggcCTTCAGCTTCCCGATATCCGACGGTAGTGTccctatctacagcaaga    |
| CHD5_505 | ccaaggagtccctgtctgggaCTTCAGCTTCCCGATATCCGACGGTAGTGTgttgctattgaggagcag  |
| CHD5_506 | caccagcagccaagctcccCTTCAGCTTCCCGATATCCGACGGTAGTGTgtcatgtcaggtagcggc    |
| CHD5_507 | gatcatgtaccgtggctcattctCTTCAGCTTCCCGATATCCGACGGTAGTGTaccgtccctcctg     |
| CHD5_508 | ccctcaagtctgaggtccacaaCTTCAGCTTCCCGATATCCGACGGTAGTGTgagctcctcccctac    |
| CHD5_510 | gtgactatccttggcaggccCTTCAGCTTCCCGATATCCGACGGTAGTGTcctgtcaccttggctg     |
| CHD5_509 | atthccagaggatacagcagcCTTCAGCTTCCCGATATCCGACGGTAGTGTctctcagaggctctc     |
| CHD5_511 | gtttcaatgggctcctctcctcCTTCAGCTTCCCGATATCCGACGGTAGTGTctctgcccacccc      |
| CHD5_512 | agcaaaatggtgacaaaggaagCTTCAGCTTCCCGATATCCGACGGTAGTGTctcctgggtccccgt    |
| CHD5_513 | cctctgcaaaaaagaggttctCTTCAGCTTCCCGATATCCGACGGTAGTGTggaccatggggcacagg   |
| CHD5_514 | ggtgtcctctgagaaggagaCTTCAGCTTCCCGATATCCGACGGTAGTGTggcacctgtgactct      |
| CHD5_515 | gctgtcctcactctcactctaCTTCAGCTTCCCGATATCCGACGGTAGTGTacatggcactggggtg    |
| CHD5_516 | gagaggagcggcagaggagcCTTCAGCTTCCCGATATCCGACGGTAGTGTccctcctctctgtag      |
| CHD5_518 | gcctgtggtgtgtggggtCTTCAGCTTCCCGATATCCGACGGTAGTGTgtctcagctcttccctg      |
| CHD5_517 | atcaaggaaaagagctgagacaCTTCAGCTTCCCGATATCCGACGGTAGTGTaccacacacaccacag   |
| CHD5_519 | ggggtccaggagatcactcCTTCAGCTTCCCGATATCCGACGGTAGTGTgactagggtttctgga      |
| CHD5_520 | acctctgcccagcccgtCTTCAGCTTCCCGATATCCGACGGTAGTGTgagttcaggagttgagcat     |
| CHD5_521 | aagtgtcacaggcttgggtagCTTCAGCTTCCCGATATCCGACGGTAGTGTggtctgtacttccgtt    |
| CHD5_522 | gctcacagaggtgccgatgaCTTCAGCTTCCCGATATCCGACGGTAGTGTccctacagagagttactca  |
| CHD5_523 | ggcggtatggtgcagagcctcCTTCAGCTTCCCGATATCCGACGGTAGTGTgaggttccccggggtc    |
| CHD5_524 | gttcagaaaggcctccgctgCTTCAGCTTCCCGATATCCGACGGTAGTGTgaggtgtcacacctggg    |
| CHD5_525 | ccccgcagagcctcaactCTTCAGCTTCCCGATATCCGACGGTAGTGTcatcccgaatccctcacc     |
| CHD5_527 | cctgtcttcccgatctctcCTTCAGCTTCCCGATATCCGACGGTAGTGTcccactgaggaactgt      |
| CHD5_526 | cagttcctcaggtgggagcccagCTTCAGCTTCCCGATATCCGACGGTAGTGTgcggaacagacaggc   |
| CHD5_529 | cagtttagtggctgggctactCTTCAGCTTCCCGATATCCGACGGTAGTGTcgtgccctctgtctg     |
| CHD5_528 | acagaggggacggagtgagctCTTCAGCTTCCCGATATCCGACGGTAGTGTgacctaacactgaga     |
| CHD5_530 | gttcgggacaggtcctcctgCTTCAGCTTCCCGATATCCGACGGTAGTGTgacagaatcctccccac    |
| CHD5_531 | gcaagcaggtcaactacaacgatCTTCAGCTTCCCGATATCCGACGGTAGTGTgaggtggagcggaaatc |
| CHD5_532 | acctgacctgcccccttctcCTTCAGCTTCCCGATATCCGACGGTAGTGTcccagtagtggggtcc     |
| CHD5_533 | gtgtcatctgtagcctcgttctCTTCAGCTTCCCGATATCCGACGGTAGTGTgctgcggatggagg     |
| CHD5_534 | cagaacatgaacgagtagctgagCTTCAGCTTCCCGATATCCGACGGTAGTGTcacactgatttgcctg  |
| CHD5_535 | cctgagacatgctcgtgagCTTCAGCTTCCCGATATCCGACGGTAGTGTgagaggagctgaggtcgg    |

|           |                                                                        |
|-----------|------------------------------------------------------------------------|
| CHD5_536  | cggtcacacccatccctgatgCTTCAGCTTCCCGATATCCGACGGTAGTGTctgtatctctgcttagga  |
| CHD5_537  | caggtgggtgagcatcatcttgcCTTCAGCTTCCCGATATCCGACGGTAGTGTgctccctcggaacagag |
| CHD5_538  | gggtccatgaccaagcaggagCTTCAGCTTCCCGATATCCGACGGTAGTGTgccagaacaagaagtgat  |
| CHD5_539  | catgagctcaagagcatggaatCTTCAGCTTCCCGATATCCGACGGTAGTGTagtccagaaagcgtagat |
| CHD5_540  | gtggccaggttgatgccagaCTTCAGCTTCCCGATATCCGACGGTAGTGTgcatgaaggagacaactg   |
| CHD5_541  | ggactggaacccgcacaatgacCTTCAGCTTCCCGATATCCGACGGTAGTGTaaacactccatctgctg  |
| CHD5_542  | gtccagcatcttggtcatctgcCTTCAGCTTCCCGATATCCGACGGTAGTGTaatcagaaccttgggca  |
| CHD5_543  | gactctctggagtacgaaggctaCTTCAGCTTCCCGATATCCGACGGTAGTGTgaggcagctctctct   |
| CHD5_544  | agacttgaccaggagcttccaCTTCAGCTTCCCGATATCCGACGGTAGTGTatctctctgtgggtgt    |
| CHD5_545  | gaagctcatgctgtacagaagaCTTCAGCTTCCCGATATCCGACGGTAGTGTggcccttggtagcaga   |
| CHD5_546  | cagtgctcaaaagtctctgtgCTTCAGCTTCCCGATATCCGACGGTAGTGTagaagctgcatatgagc   |
| CHD5_547  | caagggggggggaaccaagatCTTCAGCTTCCCGATATCCGACGGTAGTGTtccagcccactcgag     |
| CHD5_549  | ggagctgagccagatgcagaaCTTCAGCTTCCCGATATCCGACGGTAGTGTgagttgtgacatctcca   |
| CHD5_548  | gttcttgaacacgtcagccttgaCTTCAGCTTCCCGATATCCGACGGTAGTGTcctggaaatcgaccag  |
| CHD5_550  | gagcgcttagccatgtaggCTTCAGCTTCCCGATATCCGACGGTAGTGTcatgagcttctgtatctg    |
| CHD5_551  | gtagctgttaagaccctaaaaCTTCAGCTTCCCGATATCCGACGGTAGTGTccactccctagccaga    |
| CHD5_552  | agattgattacaagctgctgctCTTCAGCTTCCCGATATCCGACGGTAGTGTgaaacaccagccaaggt  |
| CHD5_553  | ggtgagcagcacgtggaattgatCTTCAGCTTCCCGATATCCGACGGTAGTGTggggctggcgccag    |
| CHD5_554  | ccatcctgggctccatcgagtCTTCAGCTTCCCGATATCCGACGGTAGTGTgtctctggactgtgat    |
| CHD5_556  | gagtttctcttgaggacaacgcCTTCAGCTTCCCGATATCCGACGGTAGTGTccctactggtagcgc    |
| CHD5_555  | cacgtagaagtcggggcccaCTTCAGCTTCCCGATATCCGACGGTAGTGTtcttccaagatagcgag    |
| CHD5_560  | gcctttgcacatgcaattcttctCTTCAGCTTCCCGATATCCGACGGTAGTGTgtacgggtcagtgctc  |
| CHD5_561  | cccagcatcagctccctgggaaaCTTCAGCTTCCCGATATCCGACGGTAGTGTaccaccactgctgctc  |
| CHD5_562  | aagacaccaggctgccaaagaggCTTCAGCTTCCCGATATCCGACGGTAGTGTcaggcctactggggcca |
| CHD5_563  | cacttgatcaggtagtgcaatccCTTCAGCTTCCCGATATCCGACGGTAGTGTgctctgtgcttagcag  |
| CHD5_564  | gtgcactgggagatcgatgacCTTCAGCTTCCCGATATCCGACGGTAGTGTaggctccctatcaaac    |
| CHD5_565  | catcttggcatagagggtctctCTTCAGCTTCCCGATATCCGACGGTAGTGTcaaaagactgacgtgg   |
| CHD5_566  | cgcttctaccgctatggcatCTTCAGCTTCCCGATATCCGACGGTAGTGTgtgatgtatgcacactacca |
| CHD5_567  | agaaggagatggggcatggtcCTTCAGCTTCCCGATATCCGACGGTAGTGTctcttggccttctctacc  |
| CHD5_568  | ccctcaggggcttaggtggagCTTCAGCTTCCCGATATCCGACGGTAGTGTtccagggctaccaggtc   |
| CHD5_569  | ccctgagagagagtcttgtcaCTTCAGCTTCCCGATATCCGACGGTAGTGTcccactgaaggcaaaag   |
| CHD5_570  | cctccatcagtgccactgccCTTCAGCTTCCCGATATCCGACGGTAGTGTtccagtgtaaatcgctg    |
| CHD5_571  | ccccgtcttgacacgcggcaCTTCAGCTTCCCGATATCCGACGGTAGTGTcggggcgggcggaaca     |
| CHD5_572  | cgagctgctctgctgcagcCTTCAGCTTCCCGATATCCGACGGTAGTGTggcctctccccaggaga     |
| CHD5_573  | ccccaaatgaggcacagggtCTTCAGCTTCCCGATATCCGACGGTAGTGTcgtctctcgctccac      |
| CHD5_574  | cctgctggcacactcacagtaatCTTCAGCTTCCCGATATCCGACGGTAGTGTcgggctctgccaagg   |
| CHD5_575  | gggagatcatcctgtgacacCTTCAGCTTCCCGATATCCGACGGTAGTGTcagtgagttgggtgtgt    |
| CHD5_577  | gaatgctctgcagccctgggcaaCTTCAGCTTCCCGATATCCGACGGTAGTGTgggccaagcaagccttc |
| CHD5_577  | gaatgctctgcagccctgggcaaCTTCAGCTTCCCGATATCCGACGGTAGTGTgggccaagcaagccttc |
| CHD5_576  | ccttctatcttctcactctgcCTTCAGCTTCCCGATATCCGACGGTAGTGTaactctctggaaggag    |
| CHD5_578  | catctttggagcctttagcttCTTCAGCTTCCCGATATCCGACGGTAGTGTatgcatgcaaatgcacac  |
| CHD5_578  | catctttggagcctttagcttCTTCAGCTTCCCGATATCCGACGGTAGTGTatgcatgcaaatgcacac  |
| CHD5_579  | gaagaaaaaggcaaaaggaaaaCTTCAGCTTCCCGATATCCGACGGTAGTGTattgggtaaccgagagc  |
| CHD5_579  | gaagaaaaaggcaaaaggaaaaCTTCAGCTTCCCGATATCCGACGGTAGTGTattgggtaaccgagagc  |
| CHD5_580  | gatggtgaccgtctctacagccCTTCAGCTTCCCGATATCCGACGGTAGTGTaaaggacactctccag   |
| CHD5_581  | cccctccgtagccgtcagcCTTCAGCTTCCCGATATCCGACGGTAGTGTtcccatgtccaaaatgatg   |
| CHD5_582  | gagatgagagccaccgaccCTTCAGCTTCCCGATATCCGACGGTAGTGTtggctgctgaactcc       |
| CHD5_584  | acgactggactactgttctctCTTCAGCTTCCCGATATCCGACGGTAGTGTcaaagcctctagcgaga   |
| CHD5_583  | ggacttgggctctacagagaccCTTCAGCTTCCCGATATCCGACGGTAGTGTcagccttagtccccg    |
| CHD5_585  | ggctttttctcttctgctCTTCAGCTTCCCGATATCCGACGGTAGTGTagaacatacaggcaagagg    |
| CHD5_586  | gaaggatgaggatgaggatgaCTTCAGCTTCCCGATATCCGACGGTAGTGTaatgatgagctatcagaga |
| CHD5_587  | cagagtctgggtggcaggaCTTCAGCTTCCCGATATCCGACGGTAGTGTttttatcggggagtgtcac   |
| CHD5_588  | acagggaaaaagtcatgaaggctCTTCAGCTTCCCGATATCCGACGGTAGTGTcaaccaccgcccc     |
| CHD5_589  | cgtgagccttctaagaagaagaCTTCAGCTTCCCGATATCCGACGGTAGTGTcagggtgctctgtgt    |
| CHD5_591  | cggggcgcggtgctcctggggcCTTCAGCTTCCCGATATCCGACGGTAGTGTcggcgaggggggcg     |
| CHD5_590  | cgccccctcccggggcgcCTTCAGCTTCCCGATATCCGACGGTAGTGTaggcgaccgccccg         |
| EPHB2_638 | cgctccccgggctctggggcgcCTTCAGCTTCCCGATATCCGACGGTAGTGTcggcgccccgtgcc     |
| EPHB2_637 | gggcacggggcgcgcgctcCTTCAGCTTCCCGATATCCGACGGTAGTGTcgaagggccccgggaagcg   |
| EPHB2_640 | cacctaccaggcctgtcaatCTTCAGCTTCCCGATATCCGACGGTAGTGTgaccaatgcaaggttggg   |
| EPHB2_639 | ggtcccaaacctgcatgtgctCTTCAGCTTCCCGATATCCGACGGTAGTGTgattgacagcctggtga   |
| EPHB2_641 | actggctacggaccaagtttatcCTTCAGCTTCCCGATATCCGACGGTAGTGTgctgagccttacctc   |
| EPHB2_642 | gttctgcttactcaaacacgCTTCAGCTTCCCGATATCCGACGGTAGTGTtagaggtgaaagttctct   |
| EPHB2_644 | gagtcaagtgcagcctcatagtaaCTTCAGCTTCCCGATATCCGACGGTAGTGTccgcacctcggtgtt  |
| EPHB2_643 | catgggtgaaggtggataccatCTTCAGCTTCCCGATATCCGACGGTAGTGTaagtttctggtgctgac  |
| EPHB2_645 | gtgccccgcatcatcagaatgCTTCAGCTTCCCGATATCCGACGGTAGTGTggccgctgatgaaa      |

|            |                                                                          |
|------------|--------------------------------------------------------------------------|
| EPHB2_646  | gcggtagaagacacgcacggcCTTCAGCTTCCCGATATCCGACGGTAGTGTgcttgatgggtacatcca    |
| EPHB2_647  | gaggtaaagggccaggggtggggcCTTCAGCTTCCCGATATCCGACGGTAGTGTatcccaatcggaagag   |
| EPHB2_648  | gcagacggtgccattctcaacgCTTCAGCTTCCCGATATCCGACGGTAGTGTctggccctagatgctctc   |
| EPHB2_649  | caatggctactacagagcagCTTCAGCTTCCCGATATCCGACGGTAGTGTgtgactctctctgtctctc    |
| EPHB2_650  | cagacacagttggtggccctCTTCAGCTTCCCGATATCCGACGGTAGTGTcaatctcactctgagctt     |
| EPHB2_652  | catgaggaggctcattgacacCTTCAGCTTCCCGATATCCGACGGTAGTGTgctgtggtcgtactgta     |
| EPHB2_651  | gtctacaacatcatctgcaagagCTTCAGCTTCCCGATATCCGACGGTAGTGTactgaccaacacctctc   |
| EPHB2_653  | accagagcccctctcgcctcCTTCAGCTTCCCGATATCCGACGGTAGTGTcaccgctcgggggacaat     |
| EPHB2_654  | agtaacgcccgttcacagcctggCTTCAGCTTCCCGATATCCGACGGTAGTGTgtgaggactcgaggacc   |
| EPHB2_656  | ggctgggaccacgacagggtaatCTTCAGCTTCCCGATATCCGACGGTAGTGTagaactcccaggccta    |
| EPHB2_655  | gctgcagtactatgagaaggtacCTTCAGCTTCCCGATATCCGACGGTAGTGTctgacctctggcctctc   |
| EPHB2_657  | catctatgtctccaggtcggCTTCAGCTTCCCGATATCCGACGGTAGTGTggaccactatgagcca       |
| EPHB2_658  | accgtgttggtgggctttttatCTTCAGCTTCCCGATATCCGACGGTAGTGTgctggactctgtcacc     |
| EPHB2_659  | ccttctagatgtcagccctcccCTTCAGCTTCCCGATATCCGACGGTAGTGTtactccagaccatgaca    |
| EPHB2_660  | acaggtgggtggggtctccagCTTCAGCTTCCCGATATCCGACGGTAGTGTaatgcctaccatgcttctc   |
| EPHB2_661  | atggcgtgacaaccacagcaCTTCAGCTTCCCGATATCCGACGGTAGTGTtccctgcgaattgtgagaa    |
| EPHB2_662  | acagatgtacacaccaagcgCTTCAGCTTCCCGATATCCGACGGTAGTGTacactgtggtctccag       |
| EPHB2_663  | ccactggtgtagtgttcagctCTTCAGCTTCCCGATATCCGACGGTAGTGTcaggaaccacttgatc      |
| EPHB2_664  | attgagcaggtgtagcagcaCTTCAGCTTCCCGATATCCGACGGTAGTGTcatatgacagaccctggtc    |
| EPHB2_665  | gacacaggagatgtaattctctCTTCAGCTTCCCGATATCCGACGGTAGTGTgctcctgcccacatc      |
| EPHB2_666  | gacttctgagcgaagcctcCTTCAGCTTCCCGATATCCGACGGTAGTGTgctctcttgggtttctct      |
| EPHB2_667  | gtagcccactgagctctCTTCAGCTTCCCGATATCCGACGGTAGTGTtccatgaactcggatgaga       |
| EPHB2_668  | cttcatactgtagcctgaaCTTCAGCTTCCCGATATCCGACGGTAGTGTcaagagcacacctgtgat      |
| EPHB2_669  | gttcacctgactggctgcCTTCAGCTTCCCGATATCCGACGGTAGTGTgctctctgtttactctgt       |
| EPHB2_670  | gttcatgtctccaggtactctatCTTCAGCTTCCCGATATCCGACGGTAGTGTaggcactggtgtagg     |
| EPHB2_671  | caattgggccaagcactgtccCTTCAGCTTCCCGATATCCGACGGTAGTGTtagaggcagataccagac    |
| EPHB2_672  | gtgatgtcctatggggagcggCTTCAGCTTCCCGATATCCGACGGTAGTGTccacaaccctctcttctc    |
| EPHB2_673  | ccacacatcactggcaggtCTTCAGCTTCCCGATATCCGACGGTAGTGTatcttccctctccatctg      |
| EPHB2_674  | gcccgaattcggcacaattgctCTTCAGCTTCCCGATATCCGACGGTAGTGTactgcaactgctgattgt   |
| EPHB2_675  | acagccagcatgagttggtcagCTTCAGCTTCCCGATATCCGACGGTAGTGTgccagggtggggcctt     |
| EPHB2_676  | aaggacaggactagtgtttatggCTTCAGCTTCCCGATATCCGACGGTAGTGTgcccctctctctggg     |
| EPHB2_677  | gtacaaggagagcttcgcaatCTTCAGCTTCCCGATATCCGACGGTAGTGTagtgcctgaccatctc      |
| EPHB2_678  | ccactctccaccgtgtaagCTTCAGCTTCCCGATATCCGACGGTAGTGTgggggtgtaaggtagaca      |
| EPHB2_680  | gcatcactggatactgttcaggCTTCAGCTTCCCGATATCCGACGGTAGTGTggccctgagtgatag      |
| EPHB2_679  | gtttgacattcacctgcctcggCTTCAGCTTCCCGATATCCGACGGTAGTGTcctaacacacgtcttct    |
| ATP1A2_697 | ggcagagtggtgagggaccttCTTCAGCTTCCCGATATCCGACGGTAGTGTatcccactcagctctct     |
| ATP1A2_696 | gagaggagctgagggatacttCTTCAGCTTCCCGATATCCGACGGTAGTGTtccctcagccactctgc     |
| ATP1A2_698 | ggagaaggaaactggatgagctgaCTTCAGCTTCCCGATATCCGACGGTAGTGTggtgggaatggaggcc   |
| ATP1A2_699 | cattctctgctggtggcggcagCTTCAGCTTCCCGATATCCGACGGTAGTGTcaatgggctgcaggga     |
| ATP1A2_701 | gaaggagggtgagttacttggCTTCAGCTTCCCGATATCCGACGGTAGTGTccacctgtagtgcgat      |
| ATP1A2_700 | catgcagcatcaaggtggcagCTTCAGCTTCCCGATATCCGACGGTAGTGTaagtaactcacctcctt     |
| ATP1A2_702 | caaccctgagtggtcaagttCTTCAGCTTCCCGATATCCGACGGTAGTGTatggtgactgctgggtt      |
| ATP1A2_703 | ggtggtgtagggcgttgggCTTCAGCTTCCCGATATCCGACGGTAGTGTtggatggtcatcctccat      |
| ATP1A2_704 | accctgaaccccaacacagtgCTTCAGCTTCCCGATATCCGACGGTAGTGTatcctgctggtggtggg     |
| ATP1A2_705 | acctcaggaagatggcaggCTTCAGCTTCCCGATATCCGACGGTAGTGTccttgaactcttctctct      |
| ATP1A2_706 | aatcatgatcttggagctctCTTCAGCTTCCCGATATCCGACGGTAGTGTgatctttctgttcatctc     |
| ATP1A2_707 | aatcatgatcttggagctctCTTCAGCTTCCCGATATCCGACGGTAGTGTgatctttctgtcctatctc    |
| ATP1A2_708 | ggtggaggtgaaagggtggaagacCTTCAGCTTCCCGATATCCGACGGTAGTGTgacaggagaagaaggcag |
| ATP1A2_709 | ccaccactctctgctgttatCTTCAGCTTCCCGATATCCGACGGTAGTGTgacacagccttctctt       |
| ATP1A2_710 | actgttgaagggtgagaagcCTTCAGCTTCCCGATATCCGACGGTAGTGTgactatgactccttct       |
| ATP1A2_711 | gaaacagatattggggtctccaCTTCAGCTTCCCGATATCCGACGGTAGTGTccaccaatggcagagct    |
| ATP1A2_712 | attgaacacttcatcagctgatCTTCAGCTTCCCGATATCCGACGGTAGTGTctgatccccaccatgt     |
| ATP1A2_713 | ccgccaacccctcaggcctgaCTTCAGCTTCCCGATATCCGACGGTAGTGTatgaggaagatgactcct    |
| ATP1A2_714 | gggtctcactactcttctcaCTTCAGCTTCCCGATATCCGACGGTAGTGTcctctcatctgggcta       |
| ATP1A2_716 | gtcaggcacacctgtagagaaaCTTCAGCTTCCCGATATCCGACGGTAGTGTacggtcatcggttctg     |
| ATP1A2_715 | gaacctggaggcgtggagacCTTCAGCTTCCCGATATCCGACGGTAGTGTgaccacggtctagggtaa     |
| ATP1A2_717 | cagaggggtggataggattagaCTTCAGCTTCCCGATATCCGACGGTAGTGTactccaccatctgctc     |
| ATP1A2_719 | cggttgacagaccagcaattCTTCAGCTTCCCGATATCCGACGGTAGTGTccacatcatgtgagaagga    |
| ATP1A2_718 | gtctaagtaggggtcaggacCTTCAGCTTCCCGATATCCGACGGTAGTGTtctggtccccctcatt       |
| ATP1A2_720 | gcagagattccttcaactctaCTTCAGCTTCCCGATATCCGACGGTAGTGTgctgacactgaattctg     |
| ATP1A2_721 | ggggttctgtctctcttttCTTCAGCTTCCCGATATCCGACGGTAGTGTcctctgtagtgatgattc      |
| ATP1A2_722 | cctggtgcaggcgaaggagaCTTCAGCTTCCCGATATCCGACGGTAGTGTcaagatggccctctctgta    |
| ATP1A2_723 | cggtcagaaatgcctctggcCTTCAGCTTCCCGATATCCGACGGTAGTGTcctctgtttctggcctctc    |
| ATP1A2_725 | atgagctgaactttccacggagCTTCAGCTTCCCGATATCCGACGGTAGTGTgtggggactgtggggg     |
| ATP1A2_726 | aatttgaagccccaggaaactCTTCAGCTTCCCGATATCCGACGGTAGTGTcagtaactttagtgcctgc   |

|            |                                                                         |
|------------|-------------------------------------------------------------------------|
| ATP1A2_727 | gttcaaggagctgcagtggtcttCAGCTTCCCGATATCCGACGGTAGTGTtggggctcatgtctat      |
| ATP1A2_728 | caacattccccatgagtcagtCCTCAGCTTCCCGATATCCGACGGTAGTGTgtgtctctctctctccc    |
| ATP1A2_729 | ccacagtctcttaccctctgatCCTCAGCTTCCCGATATCCGACGGTAGTGTactctccaggggacac    |
| ATP1A2_730 | aaccacacagagatgctcttgcCCTCAGCTTCCCGATATCCGACGGTAGTGTgggtctgtacaggtgcc   |
| ATP1A2_731 | gatctcatcgagctgctccgatCCTCAGCTTCCCGATATCCGACGGTAGTGTctgcctccccgctccctg  |
| ATP1A2_732 | gtcttaagcaggcagcagacatCCTCAGCTTCCCGATATCCGACGGTAGTGTttctgtctcaagtgtg    |
| ATP1A2_733 | caatgccaatgtcagctctcttCCTCAGCTTCCCGATATCCGACGGTAGTGTctcaaacatcccaacc    |
| ATP1A2_735 | gtgtaggcagtggtattcttcaagCCTCAGCTTCCCGATATCCGACGGTAGTGTcactctctgcctcac   |
| ATP1A2_734 | ccaacatccccctacctctgggCCTCAGCTTCCCGATATCCGACGGTAGTGTctctgacctccctgatgc  |
| ATP1A2_736 | ggcacagcctggaagacaatCCTCAGCTTCCCGATATCCGACGGTAGTGTttagcctgggcacagatat   |
| ATP1A2_737 | aatgagaggctcatcagcatggCCTCAGCTTCCCGATATCCGACGGTAGTGTtcccttcaaatgccctcc  |
| ATP1A2_738 | ccagcttgctctctgggagCCTCAGCTTCCCGATATCCGACGGTAGTGTtctgtctggaatttggctt    |
| ATP1A2_739 | accatgaatgatctggaggacagCCTCAGCTTCCCGATATCCGACGGTAGTGTgctttggccctctacc   |
| ATP1A2_740 | ccagtagcctgatggcaggaaaCCTCAGCTTCCCGATATCCGACGGTAGTGTctgcaggcattcagct    |
| ATP1A2_741 | accgccgcaactcagctcttCCTCAGCTTCCCGATATCCGACGGTAGTGTgacactctcatctgtctctg  |
| ATP1A2_742 | gatgatgagctcagcccactgcCCTCAGCTTCCCGATATCCGACGGTAGTGTccagggctgagttgaa    |
| ATP1A2_743 | accgcctcaagtgagtgctcttCCTCAGCTTCCCGATATCCGACGGTAGTGTccccctcactgccac     |
| ATP1A2_744 | cccatgcctggcagtaagagCCTCAGCTTCCCGATATCCGACGGTAGTGTggctgtcacataaaggag    |
| ATP1A2_745 | gtccgaaagctacctctgcCCTCAGCTTCCCGATATCCGACGGTAGTGTtttgaatgctctttagtg     |
| ATP1A2_746 | catcatagatgaagatgaggaggCCTCAGCTTCCCGATATCCGACGGTAGTGTccagtagtgggagtg    |
| ATP1A2_748 | gagagattgggagtgagattgCCTCAGCTTCCCGATATCCGACGGTAGTGTaatgcccccgtatttc     |
| ATP1A2_747 | aaataacgggtggcattgggtCCTCAGCTTCCCGATATCCGACGGTAGTGTctcactccaatctctct    |
| AKT3_750   | gtaagttcaatgctcatgCCTCAGCTTCCCGATATCCGACGGTAGTGTgtgctgtggcatattaag      |
| AKT3_749   | gacttaatatgccacaagcaCCTCAGCTTCCCGATATCCGACGGTAGTGTacatgagctattgaaactt   |
| AKT3_751   | cagtcataccatcctcatcaCCTCAGCTTCCCGATATCCGACGGTAGTGTgtgatgtccaggaatcatt   |
| AKT3_752   | ggacaatgagaggcgccgcCCTCAGCTTCCCGATATCCGACGGTAGTGTtgcctctgtcatctttcc     |
| AKT3_753   | gtaaaaagaaagaaaagatttCCTCAGCTTCCCGATATCCGACGGTAGTGTcaattgcttctaatt      |
| AKT3_754   | gctgtacctcttttaacctcCCTCAGCTTCCCGATATCCGACGGTAGTGTcttaccagcgactcag      |
| AKT3_756   | ggcatagtggtatataatttggCCTCAGCTTCCCGATATCCGACGGTAGTGTacttaatttattctg     |
| AKT3_755   | attaagtaagtataaaacatttacCCTCAGCTTCCCGATATCCGACGGTAGTGTtatgccataaagaat   |
| AKT3_758   | atttctcgaacactctctcagaCCTCAGCTTCCCGATATCCGACGGTAGTGTgactatggccgagcag    |
| AKT3_757   | gtttctcatgctctggttcttCCTCAGCTTCCCGATATCCGACGGTAGTGTaattcactaagcgttattt  |
| AKT3_759   | atttttacataaaatgaatcttCCTCAGCTTCCCGATATCCGACGGTAGTGTtgacaaccttaggcc     |
| AKT3_760   | ccctcttggcaaaagccaaCCTCAGCTTCCCGATATCCGACGGTAGTGTaatgcttaaatggtttact    |
| AKT3_761   | cacagatgcagccacatgaaCCTCAGCTTCCCGATATCCGACGGTAGTGTtggattttcatgttgg      |
| AKT3_762   | caccgctctctcgacaaatCCTCAGCTTCCCGATATCCGACGGTAGTGTgcaaaaaaaatttggatt     |
| AKT3_763   | gaggaccgcacagtttctatCCTCAGCTTCCCGATATCCGACGGTAGTGTcacaatattgtagagag     |
| AKT3_765   | atccagatattgcatgtagtaCCTCAGCTTCCCGATATCCGACGGTAGTGTaatacaggattataatgt   |
| AKT3_764   | cattataatcctgtattcttataCCTCAGCTTCCCGATATCCGACGGTAGTGTcatgcaaatatctggatt |
| AKT3_767   | gactagaggacagatgtataatCCTCAGCTTCCCGATATCCGACGGTAGTGTtattattatcagtc      |
| AKT3_766   | cactgataataataattcactatCCTCAGCTTCCCGATATCCGACGGTAGTGTatctgtcctctagtca   |
| AKT3_768   | ccaaaagtgcctttacctagtaCCTCAGCTTCCCGATATCCGACGGTAGTGTgcacactgcaaaaaaa    |
| AKT3_769   | aaagtatttggctcgagagCCTCAGCTTCCCGATATCCGACGGTAGTGTattgcaaacatataat       |
| AKT3_770   | gtctgtctctacagcctggCCTCAGCTTCCCGATATCCGACGGTAGTGTgtgctgggaataagtatta    |
| AKT3_771   | gcagaggcaagaagaggagaCCTCAGCTTCCCGATATCCGACGGTAGTGTtattttgtattgattcata   |
| AKT3_772   | gctttggtcgttctgtttcaCCTCAGCTTCCCGATATCCGACGGTAGTGTctttagattgagttgct     |
| AKT3_773   | gatgtctccagtggaactactCCTCAGCTTCCCGATATCCGACGGTAGTGTagaactctgagtctca     |
| AKT3_775   | gtggattaccttaccctcCCTCAGCTTCCCGATATCCGACGGTAGTGTctgttcattttttcagca      |
| AKT3_774   | gaagatcttggcctcagatCCTCAGCTTCCCGATATCCGACGGTAGTGTaaataaaatacaagatgaat   |
| AKT3_777   | gctccgaaacaaaaataataCCTCAGCTTCCCGATATCCGACGGTAGTGTgcagcagagaatccaaac    |
| AKT3_776   | gttggattctctgctgctcCCTCAGCTTCCCGATATCCGACGGTAGTGTtattttggttggcggagc     |
| HNRNPU_779 | gatacatatttctcaaaaccttCCTCAGCTTCCCGATATCCGACGGTAGTGTcagtttgagtgcttat    |
| HNRNPU_778 | caataagccactcaactgttCCTCAGCTTCCCGATATCCGACGGTAGTGTggttttgagaaatagta     |
| HNRNPU_781 | gtctttatgtacattaattgtaCCTCAGCTTCCCGATATCCGACGGTAGTGTaatgggctcagagctc    |
| HNRNPU_780 | agccaattgctttaggtCCTCAGCTTCCCGATATCCGACGGTAGTGTacataaagacataagaaa       |
| HNRNPU_782 | gatagccgattccaccactcCCTCAGCTTCCCGATATCCGACGGTAGTGTcaatcatgctccagggga    |
| HNRNPU_783 | cccctgttttctggcctgCCTCAGCTTCCCGATATCCGACGGTAGTGTacaatgaaactaaaacagc     |
| HNRNPU_784 | gcttttcttgagccagtgCCTCAGCTTCCCGATATCCGACGGTAGTGTctgaactaaatagacaacac    |
| HNRNPU_785 | ggcaagaaccagtttaacagaCCTCAGCTTCCCGATATCCGACGGTAGTGTaacctatgttgaactca    |
| HNRNPU_786 | cacaatcctaaagctgacaattCCTCAGCTTCCCGATATCCGACGGTAGTGTttttggctctctcctt    |
| HNRNPU_787 | gcttttctggaagcctgcCCTCAGCTTCCCGATATCCGACGGTAGTGTacacagtaacagaatataaa    |
| HNRNPU_788 | gtttgccccaaagatgagaCCTCAGCTTCCCGATATCCGACGGTAGTGTtagatagattggttagaat    |
| HNRNPU_789 | ggctctctgcaacagtgCCTCAGCTTCCCGATATCCGACGGTAGTGTcattaattctacacaaact      |
| HNRNPU_790 | gagattgctgcccgaagaaCCTCAGCTTCCCGATATCCGACGGTAGTGTtaaataatcaacagttcaag   |
| HNRNPU_791 | caatcatcatcacaactagtgCCTCAGCTTCCCGATATCCGACGGTAGTGTgatcagggcctaaacatt   |



|            |                                                                        |
|------------|------------------------------------------------------------------------|
| HNRNPU_792 | ccaggagctggaaaaactaccCTTCAGCTTCCCGATATCCGACGGTAGTGTagtgaaggctatgaaaa   |
| HNRNPU_793 | gtatactctcaggtattgaaaaCTTCAGCTTCCCGATATCCGACGGTAGTGTtgtccaggcaagcaa    |
| HNRNPU_794 | catccagaactcccccttagCTTCAGCTTCCCGATATCCGACGGTAGTGTcttcaaaatcagtaaggag  |
| HNRNPU_795 | gttaaaatctgtctctaaactCTTCAGCTTCCCGATATCCGACGGTAGTGTacagtggccgtccagc    |
| HNRNPU_796 | gtctcacagttgatgttttCTTCAGCTTCCCGATATCCGACGGTAGTGTtccagtaagctctttaa     |
| HNRNPU_797 | gaagattatggagaaaagtCTTCAGCTTCCCGATATCCGACGGTAGTGTaagttagtaaaatagatgagt |
| HNRNPU_798 | atcttctgttaacctgaaagtCTTCAGCTTCCCGATATCCGACGGTAGTGTtctgaacattcatgagc   |
| HNRNPU_799 | gatattgacatacatgaagttcgtCTTCAGCTTCCCGATATCCGACGGTAGTGTgattagccgtggcgc  |
| HNRNPU_800 | gaagaagcactgagacgatctCTTCAGCTTCCCGATATCCGACGGTAGTGTtgtctccacaacaaca    |
| HNRNPU_801 | agagtttgccttcttgggCTTCAGCTTCCCGATATCCGACGGTAGTGTtttgcctacatagcagat     |
| HNRNPU_803 | gaagctgtttcccattatgaCTTCAGCTTCCCGATATCCGACGGTAGTGTtctgtctgtatcgga      |
| HNRNPU_805 | acattgaagagacaagtagctCTTCAGCTTCCCGATATCCGACGGTAGTGTttagaggctggcc       |
| HNRNPU_804 | gtctttaaaccctcttcttCTTCAGCTTCCCGATATCCGACGGTAGTGTattgtctctgatacagc     |
| HNRNPU_807 | gggaggtagaagaaggcggaggCTTCAGCTTCCCGATATCCGACGGTAGTGTacgcagcagcaacagc   |
| HNRNPU_806 | gcgaacagcaggtggggcggctCTTCAGCTTCCCGATATCCGACGGTAGTGTaagcaaacgcagca     |
| HNRNPU_808 | gatcgtcgcgttctgtctcctCTTCAGCTTCCCGATATCCGACGGTAGTGTcccgcgtctgttgg      |
| HNRNPU_809 | gggttccaggaaagggaagatCTTCAGCTTCCCGATATCCGACGGTAGTGTggaaggaatctcgctc    |
| HNRNPU_810 | cccaggtctaggctgccttctCTTCAGCTTCCCGATATCCGACGGTAGTGTtagctccatctgttgc    |
| HNRNPU_811 | gctcgggagcaggctcagCTTCAGCTTCCCGATATCCGACGGTAGTGTtctgacaaggctccaag      |
| HNRNPU_813 | ggagctgaaagaggagctcaagaaCTTCAGCTTCCCGATATCCGACGGTAGTGTtaggagcagccagca  |
| HNRNPU_812 | gaggaactcatggtgagggccccCTTCAGCTTCCCGATATCCGACGGTAGTGTgctctctgtctccag   |
| MBD5_885   | gctttatgtcaggttaagtcttaCTTCAGCTTCCCGATATCCGACGGTAGTGTttggagagctcctagc  |
| MBD5_886   | atccacacagcctccaacCTTCAGCTTCCCGATATCCGACGGTAGTGTggtcacttttccatttat     |
| MBD5_888   | acaaagaccactgggactgCTTCAGCTTCCCGATATCCGACGGTAGTGTacctaaaaataaacactg    |
| MBD5_887   | gaacatgcaagtgtggcttCTTCAGCTTCCCGATATCCGACGGTAGTGTaaattatgctttttcata    |
| MBD5_889   | aattattgcagtgccacacCTTCAGCTTCCCGATATCCGACGGTAGTGTgacatattcaaaaaggc     |
| MBD5_890   | gctttgtgacatcttctctcCTTCAGCTTCCCGATATCCGACGGTAGTGTtctgaaccttccaca      |
| MBD5_892   | gagttgctgcccagaaggtaCTTCAGCTTCCCGATATCCGACGGTAGTGTtccaggcagttctgtaca   |
| MBD5_891   | caaattctgtaatgctcaagtgCTTCAGCTTCCCGATATCCGACGGTAGTGTcccacaacaagagtt    |
| MBD5_893   | aatctccattcctgtgctcCTTCAGCTTCCCGATATCCGACGGTAGTGTtctcaagtaattatgga     |
| MBD5_894   | gtccatgttactgctgcccCTTCAGCTTCCCGATATCCGACGGTAGTGTtacttctgtgaaacatca    |
| MBD5_895   | cctgtacagtcactgtgcaaCTTCAGCTTCCCGATATCCGACGGTAGTGTgactgaccacttggag     |
| MBD5_896   | gaacatgtagcattactgaagCTTCAGCTTCCCGATATCCGACGGTAGTGTtctctgtgatttccat    |
| MBD5_897   | cagaaaaagccattaacatctgCTTCAGCTTCCCGATATCCGACGGTAGTGTgactcaaaaggtccagt  |
| MBD5_898   | agaaggtggaggaggaggagCTTCAGCTTCCCGATATCCGACGGTAGTGTgagtggaacttgaatgga   |
| MBD5_899   | cctggtcacatgaatcatgggCTTCAGCTTCCCGATATCCGACGGTAGTGTatcagaacctgttatcat  |
| MBD5_900   | caatgggagattacttggcaaCTTCAGCTTCCCGATATCCGACGGTAGTGTatccttcaattccagctc  |
| MBD5_901   | gtggtattaaggttccaccaggCTTCAGCTTCCCGATATCCGACGGTAGTGTccccgtgcacatgatg   |
| MBD5_902   | agggtgcatgaaatttctCTTCAGCTTCCCGATATCCGACGGTAGTGTtcttctgactgagttatc     |
| MBD5_903   | gtaagagtcagcctgttctCTTCAGCTTCCCGATATCCGACGGTAGTGTccttctcaagctccga      |
| MBD5_904   | gatgcagtaggaaaagctgactCTTCAGCTTCCCGATATCCGACGGTAGTGTtagctgtcttggctgc   |
| MBD5_905   | gcactttaaaccatgttcccCTTCAGCTTCCCGATATCCGACGGTAGTGTccagcaagtagttactc    |
| MBD5_906   | ccggcaacagctcagaattgCTTCAGCTTCCCGATATCCGACGGTAGTGTcttttctgagacatcag    |
| MBD5_907   | cctgactgctaaggagcagCTTCAGCTTCCCGATATCCGACGGTAGTGTgagcagcactaagagataa   |
| MBD5_908   | ccatttgactgtctgagcCTTCAGCTTCCCGATATCCGACGGTAGTGTtactattgtactcaagtga    |
| MBD5_909   | gaacatacctttaaaggggaaCTTCAGCTTCCCGATATCCGACGGTAGTGTtctatgagttgcaagct   |
| MBD5_910   | gaagaactagagttcatactCTTCAGCTTCCCGATATCCGACGGTAGTGTagtccccctagcctga     |
| MBD5_912   | ggaatttcaaaagccatctcCTTCAGCTTCCCGATATCCGACGGTAGTGTtcttgggtactttttcta   |
| MBD5_911   | ccagtgataccaaacagcattCTTCAGCTTCCCGATATCCGACGGTAGTGTaccatctgcaggttaat   |
| MBD5_913   | atagtcaccactgagctgCTTCAGCTTCCCGATATCCGACGGTAGTGTgattaataactgggtttg     |
| MBD5_914   | gccatcttgaagaacagatgCTTCAGCTTCCCGATATCCGACGGTAGTGTtgggaagatgggtttg     |
| MBD5_915   | atatctccagccttccagcCTTCAGCTTCCCGATATCCGACGGTAGTGTcgcacttattttccatcc    |
| MBD5_916   | gattctggttaggagatgctgCTTCAGCTTCCCGATATCCGACGGTAGTGTaataacctgcccctcatg  |
| MBD5_917   | caaatcagcaacagcagcaaCTTCAGCTTCCCGATATCCGACGGTAGTGTcgaagaatcacattatt    |
| MBD5_918   | attgttgttaaacgcagctCTTCAGCTTCCCGATATCCGACGGTAGTGTagtctgaaacagacaag     |
| MBD5_919   | gttactgccccttccactCTTCAGCTTCCCGATATCCGACGGTAGTGTcagtaacaataaacctatg    |
| MBD5_920   | ataccttgtgagttgcaacCTTCAGCTTCCCGATATCCGACGGTAGTGTactgcttctgtctatttc    |
| MBD5_921   | aagtgtagtgttggattccaCTTCAGCTTCCCGATATCCGACGGTAGTGTcaactgttgaatagg      |
| MBD5_922   | actcagatcagccccattcagCTTCAGCTTCCCGATATCCGACGGTAGTGTcaacaggtgaaggatgg   |
| MBD5_923   | gtactgttactgagctggtgaCTTCAGCTTCCCGATATCCGACGGTAGTGTatgatcaaacctccat    |
| MBD5_924   | atattcaagtcaagttgctCTTCAGCTTCCCGATATCCGACGGTAGTGTtactgctgcttcatg       |
| MBD5_925   | caaacctctctctgtcaCTTCAGCTTCCCGATATCCGACGGTAGTGTtaggactactgtgatatgg     |
| MBD5_926   | actgtccagggataaaattctCTTCAGCTTCCCGATATCCGACGGTAGTGTggaagtacaggaattt    |
| MBD5_927   | gggtgctgttcccaggcagCTTCAGCTTCCCGATATCCGACGGTAGTGTatgtgtgacatcttccac    |
| MBD5_928   | cagttccaagtctcaaatCTTCAGCTTCCCGATATCCGACGGTAGTGTgatgagtttaaggagag      |

|            |                                                                         |
|------------|-------------------------------------------------------------------------|
| MBD5_929   | cagtgccttagcagctctccaaaCTTCAGCTTCCCGATATCCGACGGTAGTGTctaggcacacaccatta  |
| MBD5_930   | gttcaattgtggcacttggtCTTCAGCTTCCCGATATCCGACGGTAGTGTgactttaatgccccaaagcg  |
| MBD5_931   | gtatcaattcatttgaagagggggCTTCAGCTTCCCGATATCCGACGGTAGTGTtctctggggctttgt   |
| MBD5_932   | gctttttgtatcatcactttggCTTCAGCTTCCCGATATCCGACGGTAGTGTtctctggcctggaaaaat  |
| MBD5_933   | gtccggaaaaggaaacagaaagCTTCAGCTTCCCGATATCCGACGGTAGTGTaccgagcagaaagtaaaaa |
| MBD5_934   | gtaggcttccaaacctctgttagCTTCAGCTTCCCGATATCCGACGGTAGTGTccacagcgtggacaga   |
| MBD5_935   | actggacaaaatgtctgggaCTTCAGCTTCCCGATATCCGACGGTAGTGTgttttctgattaggaat     |
| MBD5_936   | cactcatggcctcatgaatagCTTCAGCTTCCCGATATCCGACGGTAGTGTtagtattgctatgtgagttg |
| MBD5_938   | aaaaaacacaacaacagaggaCTTCAGCTTCCCGATATCCGACGGTAGTGTccttataaacactgcg     |
| MBD5_937   | gcgcagtgtttataaaggaaCTTCAGCTTCCCGATATCCGACGGTAGTGTctctgtgtgtgttttt      |
| CACNB4_939 | gtcagggtaatcttctccacaCTTCAGCTTCCCGATATCCGACGGTAGTGTactgctatggcaattgt    |
| CACNB4_940 | cataccaggacacttacaaccCTTCAGCTTCCCGATATCCGACGGTAGTGTtagacgaagtctaagacc   |
| CACNB4_941 | ataatgtcagcttcattcatctaCTTCAGCTTCCCGATATCCGACGGTAGTGTgagcctttcattgtga   |
| CACNB4_942 | gtgtgggtggcacgccagtaCTTCAGCTTCCCGATATCCGACGGTAGTGTatgtaaggtgtaaaaagca   |
| CACNB4_943 | accagtagcacacctgaccCTTCAGCTTCCCGATATCCGACGGTAGTGTaatggaagttaaaggatt     |
| CACNB4_944 | aaccgtgtaaaaacctgatagCTTCAGCTTCCCGATATCCGACGGTAGTGTctcttctaactagtaaga   |
| CACNB4_945 | gtcacaagtaaacacttgaatCTTCAGCTTCCCGATATCCGACGGTAGTGTatactcaggccaagca     |
| CACNB4_946 | atcttgccaactcaagattcttCTTCAGCTTCCCGATATCCGACGGTAGTGTaaggcagaaggagcta    |
| CACNB4_947 | gcagacaccatcaatcaccctCTTCAGCTTCCCGATATCCGACGGTAGTGTcttcttaagttaagaacta  |
| CACNB4_948 | agagaaatgtcagctgtcactctCTTCAGCTTCCCGATATCCGACGGTAGTGTgtcagccggctgta     |
| CACNB4_949 | ataatccagcaagagagcaCTTCAGCTTCCCGATATCCGACGGTAGTGTactgtggttataactact     |
| CACNB4_951 | cctttaaaccaaactgtgtgatCTTCAGCTTCCCGATATCCGACGGTAGTGTgttttgcctcattcttt   |
| CACNB4_950 | gaggcaaacacatgcagagaCTTCAGCTTCCCGATATCCGACGGTAGTGTtttggtaaaaggaataa     |
| CACNB4_953 | catctgttactctcagttctgaCTTCAGCTTCCCGATATCCGACGGTAGTGTcctcacttctcagc      |
| CACNB4_952 | gacaaggtagggtgagcatCTTCAGCTTCCCGATATCCGACGGTAGTGTgaagagtaacagatgat      |
| CACNB4_955 | caatgctccattcagtgaccCTTCAGCTTCCCGATATCCGACGGTAGTGTctgctattgcagagttt     |
| CACNB4_954 | gatggaagaatgtaccattgCTTCAGCTTCCCGATATCCGACGGTAGTGTtagaaccttaacagtaga    |
| CACNB4_957 | cacacatgcaagtagtttgcCTTCAGCTTCCCGATATCCGACGGTAGTGTcaagtggaaattctcttc    |
| CACNB4_956 | actaaagactcactcccccaCTTCAGCTTCCCGATATCCGACGGTAGTGTacagtgatgaaaagagt     |
| CACNB4_958 | gcctctctatcaccaatcaCTTCAGCTTCCCGATATCCGACGGTAGTGTaaaaaaagtgcatagaaaag   |
| CACNB4_959 | gggctgtgaaattggcttcaCTTCAGCTTCCCGATATCCGACGGTAGTGTtagcattttattcttctgt   |
| CACNB4_960 | atgctacagtttggactaggCTTCAGCTTCCCGATATCCGACGGTAGTGTggatgcagtagttctaca    |
| CACNB4_961 | ccgtgaaacaaatgtgagctaCTTCAGCTTCCCGATATCCGACGGTAGTGTatcctcttggaaagt      |
| CACNB4_962 | aatccgctgaaacctggcaaaCTTCAGCTTCCCGATATCCGACGGTAGTGTccaagagaaggaaagaga   |
| CACNB4_963 | cacaagcaggcgtctgaactCTTCAGCTTCCCGATATCCGACGGTAGTGTtagtgtgcatcaaattta    |
| CACNB4_965 | gatagctaattccctctcccctCTTCAGCTTCCCGATATCCGACGGTAGTGTctgtagctgtggttct    |
| CACNB4_964 | gaaaccacagctacagcttaaCTTCAGCTTCCCGATATCCGACGGTAGTGTgagagcaaatgcatatct   |
| CACNB4_967 | agaaggaggcgggagaccaggaCTTCAGCTTCCCGATATCCGACGGTAGTGTtctcaccctctctctc    |
| CACNB4_966 | acacagggggccagagagaagCTTCAGCTTCCCGATATCCGACGGTAGTGTctctccccatctggctc    |
| CACNB4_969 | gctcttctcagcatctttcaCTTCAGCTTCCCGATATCCGACGGTAGTGTtctcctcacctctctc      |
| CACNB4_968 | cagagaccgaaaggagggtgaCTTCAGCTTCCCGATATCCGACGGTAGTGTgactgctgaaaagatgctc  |
| CACNB4_971 | ccttctctctcacactctctCTTCAGCTTCCCGATATCCGACGGTAGTGTcacacggctggccat       |
| CACNB4_970 | catggccagcccgtgctggCTTCAGCTTCCCGATATCCGACGGTAGTGTgaggtgtgaggaaggaagag   |
| ERBB4_1052 | atccgccattctgttataaaaCTTCAGCTTCCCGATATCCGACGGTAGTGTccacctaataaacccaaa   |
| ERBB4_1053 | cggcctattgtggcagagaatcCTTCAGCTTCCCGATATCCGACGGTAGTGTgaaggccaagaaagcgtt  |
| ERBB4_1054 | catactcatctcggccttggCTTCAGCTTCCCGATATCCGACGGTAGTGTgctgtggttccagtagtca   |
| ERBB4_1055 | gaatgagcactgtacctcaaCTTCAGCTTCCCGATATCCGACGGTAGTGTttagaatactgaaatccag   |
| ERBB4_1056 | aaaaaacccacagattgtttcCTTCAGCTTCCCGATATCCGACGGTAGTGTcaaaagggttctctccc    |
| ERBB4_1058 | aggagagctggatgaggaaggCTTCAGCTTCCCGATATCCGACGGTAGTGTgctgagatttttagtact   |
| ERBB4_1057 | gtaccttgggtgctactgtccCTTCAGCTTCCCGATATCCGACGGTAGTGTaatggcagctgttctga    |
| ERBB4_1059 | actccttgtcagcagcaaaaccCTTCAGCTTCCCGATATCCGACGGTAGTGTggacatgggtgccac     |
| ERBB4_1060 | gtgccctacagagcccaactCTTCAGCTTCCCGATATCCGACGGTAGTGTatccttgtgctattaac     |
| ERBB4_1062 | cggcttcttaccatgttCTTCAGCTTCCCGATATCCGACGGTAGTGTattgcctctattatattcca     |
| ERBB4_1061 | ggaagaaaaatggaatgatggaCTTCAGCTTCCCGATATCCGACGGTAGTGTcagagacagagaggaa    |
| ERBB4_1063 | cctcagcatccatcatcttCTTCAGCTTCCCGATATCCGACGGTAGTGTattacatgatttatatct     |
| ERBB4_1064 | gtacttggctcctcaggcttCTTCAGCTTCCCGATATCCGACGGTAGTGTcatattgtgtctgatgggc   |
| ERBB4_1065 | caacctggaaatttacacagtgCTTCAGCTTCCCGATATCCGACGGTAGTGTggcctagtctaaaggca   |
| ERBB4_1066 | atthaaggaaactggctgctgCTTCAGCTTCCCGATATCCGACGGTAGTGTaacacacattttcaaacctt |
| ERBB4_1067 | ggatttctcgcgttggaatCTTCAGCTTCCCGATATCCGACGGTAGTGTctgctattactttactaaga   |
| ERBB4_1068 | aacgtttgcctcagctcccCTTCAGCTTCCCGATATCCGACGGTAGTGTgtttgtaaatgcttaagt     |
| ERBB4_1070 | gcttgaagcaaaaatacatCTTCAGCTTCCCGATATCCGACGGTAGTGTaaaactttactcttact      |
| ERBB4_1069 | agtaagaagtaaaagttaCTTCAGCTTCCCGATATCCGACGGTAGTGTgtatttttcttacaagc       |
| ERBB4_1071 | gctgcaaatccgatgaacCTTCAGCTTCCCGATATCCGACGGTAGTGTaagattgctctcaaaaagat    |
| ERBB4_1072 | gtgaaaatcacagatttgggcCTTCAGCTTCCCGATATCCGACGGTAGTGTaaaacctgggcattaact   |
| ERBB4_1073 | gctggatggtgggctcagacCTTCAGCTTCCCGATATCCGACGGTAGTGTcataagaattgacaggca    |

|            |                                                                        |
|------------|------------------------------------------------------------------------|
| ERBB4_1074 | gcctgttgagatgtccacCTTCAGCTCCCGATATCCGACGGTAGTGTcatggtattgcatTTTTTC     |
| ERBB4_1076 | acagacaccaggcaatcacCTTCAGCTCCCGATATCCGACGGTAGTGTatataatgtaattTTTTTC    |
| ERBB4_1075 | aaaaaatttacataaatgaCTTCAGCTCCCGATATCCGACGGTAGTGTttcctgggtgtctgta       |
| ERBB4_1078 | gagctgaagagggtaaaagtcCTTCAGCTCCCGATATCCGACGGTAGTGTgacagagagagaggactg   |
| ERBB4_1077 | ccactgggagttaatggttccaCTTCAGCTCCCGATATCCGACGGTAGTGTttaaactaacgatatgcg  |
| ERBB4_1079 | attactccagctgcaatcaggCTTCAGCTCCCGATATCCGACGGTAGTGTgaagaggagaagaata     |
| ERBB4_1080 | ggtaggctcttcttctggtCTTCAGCTCCCGATATCCGACGGTAGTGTatttggaaatggtgataat    |
| ERBB4_1082 | ctttcctagtatcatgaacaaCTTCAGCTCCCGATATCCGACGGTAGTGTtctgtaattgctgca      |
| ERBB4_1081 | attctccatccacagtacatCTTCAGCTCCCGATATCCGACGGTAGTGTacaaaatggaacatgta     |
| ERBB4_1083 | gttgggcatctttaaataCTTCAGCTCCCGATATCCGACGGTAGTGTccttggccagcaagaatg      |
| ERBB4_1084 | aatgtccagatggcttacaggCTTCAGCTCCCGATATCCGACGGTAGTGTaacacatgaatactcc     |
| ERBB4_1086 | cctgaagacatctgtgtgtCTTCAGCTCCCGATATCCGACGGTAGTGTacacctctcatgtggct      |
| ERBB4_1085 | agccatgaggagggtgaagcCTTCAGCTCCCGATATCCGACGGTAGTGTaccacagatgcttcagg     |
| ERBB4_1087 | cagatggtgacacacattcctCTTCAGCTCCCGATATCCGACGGTAGTGTgaaggcaacctagaaga    |
| ERBB4_1088 | ggggacctggccagaccaaCTTCAGCTCCCGATATCCGACGGTAGTGTctttagaatagcattacct    |
| ERBB4_1089 | gtgtgtccagttaatggtatCTTCAGCTCCCGATATCCGACGGTAGTGTgtttggtccaaagaaga     |
| ERBB4_1090 | cagcacaatcaaccagagaatCTTCAGCTCCCGATATCCGACGGTAGTGTcttatctcaagcaacagg   |
| ERBB4_1091 | ataaggctgtcacattttatCTTCAGCTCCCGATATCCGACGGTAGTGTgctgctgattctcttc      |
| ERBB4_1092 | cctacaagtgaagagtgaaaaaCTTCAGCTCCCGATATCCGACGGTAGTGTaatctgtgagccctgc    |
| ERBB4_1093 | cctgaacatacagctatggccaCTTCAGCTCCCGATATCCGACGGTAGTGTagaanaattctactacccc |
| ERBB4_1095 | caactgtgcctatgaacaCTTCAGCTCCCGATATCCGACGGTAGTGTgtaaaaaatataattggct     |
| ERBB4_1094 | gcaaaatataatttactaaaggCTTCAGCTCCCGATATCCGACGGTAGTGTatagcgcaacagttgc    |
| ERBB4_1096 | cctgtccaatgcatcacaCTTCAGCTCCCGATATCCGACGGTAGTGTtaactgacaaaaatata       |
| ERBB4_1097 | cagctcagactgtggattccCTTCAGCTCCCGATATCCGACGGTAGTGTacaataaaaaatactctgct  |
| ERBB4_1098 | aactggaatctaccacaagttaCTTCAGCTCCCGATATCCGACGGTAGTGTaggccagttctaacta    |
| ERBB4_1099 | gtgtgctgctgctccatgctCTTCAGCTCCCGATATCCGACGGTAGTGTatcaatgatgtaactatt    |
| ERBB4_1100 | acacatgctcactgtcattCTTCAGCTCCCGATATCCGACGGTAGTGTggttattcttattctgtta    |
| ERBB4_1101 | agtgccccaaacctttgtcCTTCAGCTCCCGATATCCGACGGTAGTGTatagaaaaaacctctctc     |
| ERBB4_1102 | gttctgcacacacagctctgCTTCAGCTCCCGATATCCGACGGTAGTGTgagcagataataaagag     |
| ERBB4_1103 | atgtgacggcagatgctacggCTTCAGCTCCCGATATCCGACGGTAGTGTctgaattgagcaagaca    |
| ERBB4_1105 | acacaggttgatgtggtcaagCTTCAGCTCCCGATATCCGACGGTAGTGTattataactgcatgtcc    |
| ERBB4_1104 | ggacatgcacgttataatcttCTTCAGCTCCCGATATCCGACGGTAGTGTaccacatcaacctgtgt    |
| ERBB4_1106 | gtctgcataacaaaggaattgCTTCAGCTCCCGATATCCGACGGTAGTGTgccacatagggtagaaca   |
| ERBB4_1107 | atattgttggaaacctggcCTTCAGCTCCCGATATCCGACGGTAGTGTtaccttttcatcaacaag     |
| ERBB4_1108 | cccacgaataatgctaaattCTTCAGCTCCCGATATCCGACGGTAGTGTgcatattgccattttgga    |
| ERBB4_1109 | gatcgatatgcttggcaataCTTCAGCTCCCGATATCCGACGGTAGTGTaacacaggcaactgtttgt   |
| ERBB4_1110 | ccaggtcagagagagagctcaCTTCAGCTCCCGATATCCGACGGTAGTGTgagaaaaagaagccacagc  |
| ERBB4_1111 | acagcagtagcagccttgcCTTCAGCTCCCGATATCCGACGGTAGTGTgaaatagagattttgagaaa   |
| ERBB4_1113 | ccttctggcaactcggctgcCTTCAGCTCCCGATATCCGACGGTAGTGTtggacatgaattgtcagc    |
| ERBB4_1112 | gtgacaattacatgtccaaatggCTTCAGCTCCCGATATCCGACGGTAGTGTccggagtgccagaagg   |
| MEF2C_1154 | gtggaattcgttccggtgatCTTCAGCTCCCGATATCCGACGGTAGTGTactctgcaagaaaaaa      |
| MEF2C_1155 | cattggactcaccagacctcCTTCAGCTCCCGATATCCGACGGTAGTGTccacccttcgagatacc     |
| MEF2C_1156 | actctgagataaatgagtctagtCTTCAGCTCCCGATATCCGACGGTAGTGTggagatctccccgct    |
| MEF2C_1157 | caaatctctcctgcttctacCTTCAGCTCCCGATATCCGACGGTAGTGTgtctatgagcttttaa      |
| MEF2C_1159 | gccctcagtcagttgggtaCTTCAGCTCCCGATATCCGACGGTAGTGTtcttaactagagactc       |
| MEF2C_1158 | gaagagcctggtggttgaCTTCAGCTCCCGATATCCGACGGTAGTGTgtcattgttttcaaaat       |
| MEF2C_1160 | attatcgttattatagatattttCTTCAGCTCCCGATATCCGACGGTAGTGTgacaggtctgcactac   |
| MEF2C_1161 | gttgctacggaaccatggCTTCAGCTCCCGATATCCGACGGTAGTGTacttttctatctgtatttc     |
| MEF2C_1162 | cctactttaccaggacaaggaaCTTCAGCTCCCGATATCCGACGGTAGTGTgaaatctaatttttaa    |
| MEF2C_1164 | ggtagagcgtctccctcaaaCTTCAGCTCCCGATATCCGACGGTAGTGTgtgtctatcggaagatgc    |
| MEF2C_1163 | catcttccgatagacacaacagttCTTCAGCTCCCGATATCCGACGGTAGTGTggaagcgtctcacca   |
| MEF2C_1165 | atttgctgcatattctgttCTTCAGCTCCCGATATCCGACGGTAGTGTcattatcaatatttatt      |
| MEF2C_1166 | cgtaaaccagatctccagctCTTCAGCTCCCGATATCCGACGGTAGTGTattgtttttgtaacagg     |
| MEF2C_1167 | aagcttaatggtaagacgtacattCTTCAGCTCCCGATATCCGACGGTAGTGTccagcagacctggta   |
| MEF2C_1169 | cccagactccatactgcatatCTTCAGCTCCCGATATCCGACGGTAGTGTgaggtgtggaagtaaa     |
| MEF2C_1168 | actttacctcagcaacctcagctCTTCAGCTCCCGATATCCGACGGTAGTGTctgcagatggagctg    |
| MEF2C_1170 | acaggttgctgtacaccaaCTTCAGCTCCCGATATCCGACGGTAGTGTgattacatccttaggaga     |
| MEF2C_1171 | gaaacccaacctattccaCTTCAGCTCCCGATATCCGACGGTAGTGTattctttctttacctttg      |
| MEF2C_1172 | cacagcctttgttttcttcttCTTCAGCTCCCGATATCCGACGGTAGTGTgacctactaccttggtta   |
| MEF2C_1173 | atcccgactccttattgcaCTTCAGCTCCCGATATCCGACGGTAGTGTattgatcaatgatcagcag    |
| MEF2C_1174 | ggctgtcacagcattaaggCTTCAGCTCCCGATATCCGACGGTAGTGTaatgaaggtgttctgagta    |
| MEF2C_1175 | gacccgatcggacgattcCTTCAGCTCCCGATATCCGACGGTAGTGTctgaaatactggacagcttg    |
| MEF2C_1176 | gttggtgctgtggaagatgatcagCTTCAGCTCCCGATATCCGACGGTAGTGTggggctcaccagcat   |
| MEF2C_1177 | agctgttccagatgcccagcaCTTCAGCTCCCGATATCCGACGGTAGTGTaaaacttggctgcttct    |
| MEF2C_1179 | ccacatattgtaagggtacagaCTTCAGCTCCCGATATCCGACGGTAGTGTcgagagagagaagaaaa   |

|              |                                                                         |
|--------------|-------------------------------------------------------------------------|
| MEF2C_1178   | gtttttcttctctctctcgtcCTTCAGCTTCCCGATATCCGACGGTAGTGTgtacccttaacatatgtg   |
| SYNGAP1_1219 | gggggagaagaagagagaagagCTTCAGCTTCCCGATATCCGACGGTAGTGTccatgatggccctcccc   |
| SYNGAP1_1218 | gggggaggccatattgggggCTTCAGCTTCCCGATATCCGACGGTAGTGTtttctctcttcttctcccc   |
| SYNGAP1_1220 | gctggatgaggatgagtggaCTTCAGCTTCCCGATATCCGACGGTAGTGTtttctgtgtgtctctgtc    |
| SYNGAP1_1221 | gagcagctggtccccgagaCTTCAGCTTCCCGATATCCGACGGTAGTGTccatttgcaaatgtttcttc   |
| SYNGAP1_1222 | gtacggcggccgagcaggtcCTTCAGCTTCCCGATATCCGACGGTAGTGTtctgacacacccccacctc   |
| SYNGAP1_1223 | gctccctggggggcccccCTTCAGCTTCCCGATATCCGACGGTAGTGTgtctccgcttctccccgcc     |
| SYNGAP1_1225 | ggaggaaatggcagaagggaaCTTCAGCTTCCCGATATCCGACGGTAGTGTaactgagccacatctggt   |
| SYNGAP1_1224 | gcctaccagatgtggctcagtCTTCAGCTTCCCGATATCCGACGGTAGTGTcttccctctggccatttc   |
| SYNGAP1_1226 | gtgctgacctgaccggtacagCTTCAGCTTCCCGATATCCGACGGTAGTGTaccctatccccatttccc   |
| SYNGAP1_1227 | cgaagctgctggctcggctCTTCAGCTTCCCGATATCCGACGGTAGTGTaacctttgacacagataac    |
| SYNGAP1_1228 | cattatcaagccagtgacagcCTTCAGCTTCCCGATATCCGACGGTAGTGTtctctctctgacctcc     |
| SYNGAP1_1229 | aatcttcatcaagttagctcCTTCAGCTTCCCGATATCCGACGGTAGTGTcttctctagacctctct     |
| SYNGAP1_1231 | aaggagtgtggagttgaggCTTCAGCTTCCCGATATCCGACGGTAGTGTagggtgtgtcccccttattc   |
| SYNGAP1_1230 | gaataaaggggacacaacctgtCTTCAGCTTCCCGATATCCGACGGTAGTGTtcaactccacactcctt   |
| SYNGAP1_1232 | catgctgtatgacgaccacCTTCAGCTTCCCGATATCCGACGGTAGTGTttaaactcatgccccccc     |
| SYNGAP1_1233 | catccaggcagagctcacagtaCTTCAGCTTCCCGATATCCGACGGTAGTGTgagtcacggtcacagatgc |
| SYNGAP1_1234 | acttcacagagcagtggtaccCTTCAGCTTCCCGATATCCGACGGTAGTGTttaaacaactgcccggct   |
| SYNGAP1_1235 | ccagggtggccactggcacagtCTTCAGCTTCCCGATATCCGACGGTAGTGTcaactcctttgcccttg   |
| SYNGAP1_1236 | cagagtatgtaccaacattatcCTTCAGCTTCCCGATATCCGACGGTAGTGTtccggagggggaggg     |
| SYNGAP1_1237 | aactcttatatagctccatgggCTTCAGCTTCCCGATATCCGACGGTAGTGTacctggccttgctgt     |
| SYNGAP1_1238 | aggctgacctggatttctcCTTCAGCTTCCCGATATCCGACGGTAGTGTagtccacatctgcagag      |
| SYNGAP1_1239 | ctgcacaaccaatctcCTTCAGCTTCCCGATATCCGACGGTAGTGTactcttctatgctttagtggtc    |
| SYNGAP1_1240 | acctccagatgtccaccCTTCAGCTTCCCGATATCCGACGGTAGTGTggaacgggagcacctcatattc   |
| SYNGAP1_1241 | gaatgtgctgtgagttggccctCTTCAGCTTCCCGATATCCGACGGTAGTGTgaccacacctcttgtgc   |
| SYNGAP1_1242 | caggttggctggctctgCTTCAGCTTCCCGATATCCGACGGTAGTGTctctttgaggatggacagat     |
| SYNGAP1_1244 | gaagcaaacacctctcagctCTTCAGCTTCCCGATATCCGACGGTAGTGTtactctgcataagccc      |
| SYNGAP1_1243 | cagacaggttatcagcctcCTTCAGCTTCCCGATATCCGACGGTAGTGTcggtctctcttctctct      |
| SYNGAP1_1245 | actttccaagtggaggagctcCTTCAGCTTCCCGATATCCGACGGTAGTGTactctcttaagctccttc   |
| SYNGAP1_1246 | ggccaggttctggatgacctgCTTCAGCTTCCCGATATCCGACGGTAGTGTcatagcctccccatctc    |
| SYNGAP1_1247 | ccaacagcagtagcttggaggCTTCAGCTTCCCGATATCCGACGGTAGTGTtttatcttctgacttctg   |
| SYNGAP1_1248 | gtgtccagattggagatctcataCTTCAGCTTCCCGATATCCGACGGTAGTGTgggatagggcaagagg   |
| SYNGAP1_1249 | catccaaaggcagccaagccCTTCAGCTTCCCGATATCCGACGGTAGTGTcctcagaggccctctaga    |
| SYNGAP1_1250 | agagctgtgctgatgtcgtgaCTTCAGCTTCCCGATATCCGACGGTAGTGTgggtgctcactctgtgag   |
| SYNGAP1_1251 | ggaggaaaagcaccagttctcCTTCAGCTTCCCGATATCCGACGGTAGTGTgctacatgatgcccga     |
| SYNGAP1_1253 | agcacagacagagaaggagagaCTTCAGCTTCCCGATATCCGACGGTAGTGTggtgagtgaggagggaa   |
| SYNGAP1_1252 | gtctgttccctcccactcCTTCAGCTTCCCGATATCCGACGGTAGTGTatctctctctctctgtct      |
| SYNGAP1_1254 | gttctatgtaagcgtccaccCTTCAGCTTCCCGATATCCGACGGTAGTGTcaggagccctgacctta     |
| SYNGAP1_1255 | ggtctttaccaccaggcctCTTCAGCTTCCCGATATCCGACGGTAGTGTaccctgtaagtccagcatg    |
| SYNGAP1_1256 | cagccttggggctacggcctgCTTCAGCTTCCCGATATCCGACGGTAGTGTgagtgtcaacaagagtgtg  |
| SYNGAP1_1257 | ggcttgagtgcagcaggtccccCTTCAGCTTCCCGATATCCGACGGTAGTGTgggacaccgtctgtggtg  |
| SYNGAP1_1258 | cggtggccatggcccactctcCTTCAGCTTCCCGATATCCGACGGTAGTGTctcagccagatgggtg     |
| SYNGAP1_1259 | gacctggccatcagcagccCTTCAGCTTCCCGATATCCGACGGTAGTGTtcttgctatagccatggaat   |
| SYNGAP1_1260 | cagtgatgagttggaccctctgCTTCAGCTTCCCGATATCCGACGGTAGTGTaccaccaccgaggtg     |
| SYNGAP1_1261 | gtggctatgaaggatggaggcagcCTTCAGCTTCCCGATATCCGACGGTAGTGTgaggggctggcctct   |
| SYNGAP1_1263 | ccccaccgtcccactccagCTTCAGCTTCCCGATATCCGACGGTAGTGTataacttggctctggggac    |
| SYNGAP1_1262 | caagtctcagcagtgacagtaCTTCAGCTTCCCGATATCCGACGGTAGTGTgagcagcatgctgtccc    |
| SYNGAP1_1264 | aagcctcctaccacgaagcagCTTCAGCTTCCCGATATCCGACGGTAGTGTcatccagcgggaatctatt  |
| SYNGAP1_1265 | ccccccaccctccgccaCTTCAGCTTCCCGATATCCGACGGTAGTGTgcaagaagattgtaacttca     |
| SYNGAP1_1266 | acatgctcactgtcggctCTTCAGCTTCCCGATATCCGACGGTAGTGTaatgtacctgctttttccc     |
| SYNGAP1_1267 | ggcattgtggggttaagtggcCTTCAGCTTCCCGATATCCGACGGTAGTGTgagcggctctcatccat    |
| SYNGAP1_1268 | cttccagggtcagttatgtggCTTCAGCTTCCCGATATCCGACGGTAGTGTacaagctcaaggagtact   |
| SYNGAP1_1269 | aacaaaccagcaaatcctgatcCTTCAGCTTCCCGATATCCGACGGTAGTGTagtgcgggctgctgtg    |
| SYNGAP1_1270 | ccgctcactcttccagctCTTCAGCTTCCCGATATCCGACGGTAGTGTctgccaatgatgctcttga     |
| SYNGAP1_1271 | actcaggagcccaccaggagagCTTCAGCTTCCCGATATCCGACGGTAGTGTggcagagaaggattccca  |
| SYNGAP1_1273 | gggacgggctcagtggggtCTTCAGCTTCCCGATATCCGACGGTAGTGTggacacggagaagataaatg   |
| SYNGAP1_1272 | catttatcttccgtgtccaccCTTCAGCTTCCCGATATCCGACGGTAGTGTcaactgaaacccgtccc    |
| SYNGAP1_1274 | attacggagaacggcaggttccCTTCAGCTTCCCGATATCCGACGGTAGTGTcgtcctcttttgggtg    |
| SYNGAP1_1275 | cgggtgggggtggtggggcCTTCAGCTTCCCGATATCCGACGGTAGTGTggtgatgctcaatcctggtg   |
| CLVS2_1276   | atatggtcatcaccaggccggCTTCAGCTTCCCGATATCCGACGGTAGTGTggaagctcagagataggc   |
| CLVS2_1277   | cagcgtgtctgggtttcattgaCTTCAGCTTCCCGATATCCGACGGTAGTGTgcggaaggcctcaagat   |
| CLVS2_1278   | caagcagcactgaaggatggCTTCAGCTTCCCGATATCCGACGGTAGTGTtcatcttacccttctg      |
| CLVS2_1279   | gccagggtcggctgcttaaCTTCAGCTTCCCGATATCCGACGGTAGTGTagaatacaagttggattta    |
| CLVS2_1280   | acttcacttcaagcaagccCTTCAGCTTCCCGATATCCGACGGTAGTGTtttagtactttctgtcgc     |
| CLVS2_1281   | gatcaaaacaacccattcactCTTCAGCTTCCCGATATCCGACGGTAGTGTagaagtcaaacacaagag   |

|             |                                                                        |
|-------------|------------------------------------------------------------------------|
| CLVS2_1282  | cggaaaagggtattctttctCCTCAGCTTCCCGATATCCGACGGTAGTGTgattgtttttctccat     |
| CLVS2_1283  | atcacggtgtacagggcatgCCTCAGCTTCCCGATATCCGACGGTAGTGTgaagtacattttactatagc |
| CLVS2_1284  | ggcaagaacactgctagaccatCCTCAGCTTCCCGATATCCGACGGTAGTGTtccccctctctgcat    |
| CLVS2_1285  | gtccccatgtcataaggaggcCCTCAGCTTCCCGATATCCGACGGTAGTGTtacctccagcatacctctt |
| CLVS2_1286  | gttttctgtatacattttctggCCTCAGCTTCCCGATATCCGACGGTAGTGTgcatgcctggaagga    |
| CLVS2_1288  | aaggataaagccaacgtcagCCTCAGCTTCCCGATATCCGACGGTAGTGTttccatttctaatacctga  |
| CLVS2_1287  | cccttcattggattagaatggaCCTCAGCTTCCCGATATCCGACGGTAGTGTcactgacgttggcttat  |
| STX1A_1304  | cagatgatgatcatgattttctcCCTCAGCTTCCCGATATCCGACGGTAGTGTcccagccaggtggcag  |
| STX1A_1305  | gtcatcgctccactgttggggcCCTCAGCTTCCCGATATCCGACGGTAGTGTgactgtccagctccag   |
| STX1A_1306  | cgtgttccacattgtactcgaCCTCAGCTTCCCGATATCCGACGGTAGTGTatggttgggggtcctaata |
| STX1A_1307  | ggtagactatgtggagaggccCCTCAGCTTCCCGATATCCGACGGTAGTGTcaggggtcttctctgaa   |
| STX1A_1308  | gcttgatgatctcactgtccgCCTCAGCTTCCCGATATCCGACGGTAGTGTgaggttagtgcagccctg  |
| STX1A_1309  | cgtgagctacacgacatgttcatCCTCAGCTTCCCGATATCCGACGGTAGTGTcagcaagcctctgggt  |
| STX1A_1311  | gacccctagtgtgggtctggacCCTCAGCTTCCCGATATCCGACGGTAGTGTgagggaccagaccagt   |
| STX1A_1310  | gtcacactgagcccagccctctCCTCAGCTTCCCGATATCCGACGGTAGTGTggtgagggggtcatggca |
| STX1A_1312  | ccacaaacttctggacagctggCCTCAGCTTCCCGATATCCGACGGTAGTGTgccctccaggtctcca   |
| STX1A_1313  | ggtcatgtcggagtacaaccaCCTCAGCTTCCCGATATCCGACGGTAGTGTgacacaggtgcggccac   |
| STX1A_1314  | gtggctgctaagtataaccaggCCTCAGCTTCCCGATATCCGACGGTAGTGTcagagaccaggtgcc    |
| STX1A_1317  | ggggcattctagccctgtctcCCTCAGCTTCCCGATATCCGACGGTAGTGTtaccaccctttctac     |
| STX1A_1316  | aggtagaagggtggggtaggCCTCAGCTTCCCGATATCCGACGGTAGTGTaagcaggctagaatgcc    |
| STX1A_1318  | atctctccactcgggaccaaCCTCAGCTTCCCGATATCCGACGGTAGTGTcttggggcctgaaacc     |
| STX1A_1319  | cgaggcttcattgacaagatcgcaCCTCAGCTTCCCGATATCCGACGGTAGTGTgctggccctctc     |
| STX1A_1321  | gcctctgagccaggttcagtCCTCAGCTTCCCGATATCCGACGGTAGTGTgacagcagatgatgatg    |
| STX1A_1320  | gtggacgtatgtacaggaccacCCTCAGCTTCCCGATATCCGACGGTAGTGTgaaaggggtgggtgtgc  |
| STX1A_1323  | ccggcccagcgcggccgccCCTCAGCTTCCCGATATCCGACGGTAGTGTgcccggccggctggcgc     |
| STX1A_1322  | cgccagcccggcccggcccCCTCAGCTTCCCGATATCCGACGGTAGTGTggccgcgctggggccgga    |
| SEMA3E_1385 | cattttaagcttttctctCCTCAGCTTCCCGATATCCGACGGTAGTGTaaattcttaaaagacagt     |
| SEMA3E_1386 | caccctcaagtggaaagtatgcCCTCAGCTTCCCGATATCCGACGGTAGTGTatctcgcaggagcaaaa  |
| SEMA3E_1387 | caaggtgattttacggacctCCTCAGCTTCCCGATATCCGACGGTAGTGTaagaattcctgtaccatg   |
| SEMA3E_1388 | aggtagtggaaaggagaaagtCCTCAGCTTCCCGATATCCGACGGTAGTGTacagatgacagatggtt   |
| SEMA3E_1389 | cccttccactacatctctgCCTCAGCTTCCCGATATCCGACGGTAGTGTcatctgatttgttaacct    |
| SEMA3E_1390 | gccagatgttctcagtcttaCCTCAGCTTCCCGATATCCGACGGTAGTGTtttgaatagcagctatg    |
| SEMA3E_1391 | acagtactttgtggaatgtaccCCTCAGCTTCCCGATATCCGACGGTAGTGTgacttaataatgttt    |
| SEMA3E_1392 | gtctccgaaacgcctgaaaCCTCAGCTTCCCGATATCCGACGGTAGTGTactcttttaagaagtgtg    |
| SEMA3E_1393 | gttcgacatggaatgcagcCCTCAGCTTCCCGATATCCGACGGTAGTGTgatcatttttctagtagc    |
| SEMA3E_1394 | cagtcagcacaagcacttccCCTCAGCTTCCCGATATCCGACGGTAGTGTattagggtttccaaagcaa  |
| SEMA3E_1395 | gcctggctcgagacccttaccCCTCAGCTTCCCGATATCCGACGGTAGTGTgattttgtccattctgcta |
| SEMA3E_1397 | ggtgtgtgtgtctatatgtgagCCTCAGCTTCCCGATATCCGACGGTAGTGTatattaaggttaagtgt  |
| SEMA3E_1396 | acatttaccataatgtgtaCCTCAGCTTCCCGATATCCGACGGTAGTGTatagaacacacacct       |
| SEMA3E_1399 | actacaagtgagatgtaaataggCCTCAGCTTCCCGATATCCGACGGTAGTGTggaattgtctgaaag   |
| SEMA3E_1398 | acaagaataaactagaatctaCCTCAGCTTCCCGATATCCGACGGTAGTGTtctgtatttttgcctta   |
| SEMA3E_1400 | gtttttatgggcaggttttaCCTCAGCTTCCCGATATCCGACGGTAGTGTatctctgagctatttctc   |
| SEMA3E_1401 | acctgaaacaaatagcagtagaCCTCAGCTTCCCGATATCCGACGGTAGTGTgggagatcggaaacc    |
| SEMA3E_1402 | gctttacaccaaagagaaaatCCTCAGCTTCCCGATATCCGACGGTAGTGTgctgtacattagtgga    |
| SEMA3E_1404 | ccaagcctggttctgtaagtCCTCAGCTTCCCGATATCCGACGGTAGTGTaatattttctagggca     |
| SEMA3E_1403 | aggtccttctatgtcataCCTCAGCTTCCCGATATCCGACGGTAGTGTtctatgaaacagtgaaaca    |
| SEMA3E_1405 | cctacaaagataagagtcaagtCCTCAGCTTCCCGATATCCGACGGTAGTGTaaggtgcccaatgc     |
| SEMA3E_1407 | caatatagaacaagatgctcCCTCAGCTTCCCGATATCCGACGGTAGTGTactaagcagtggaatgg    |
| SEMA3E_1406 | ggccattccatcgcttagtatCCTCAGCTTCCCGATATCCGACGGTAGTGTggcattctgtctatata   |
| SEMA3E_1408 | ccctctacatcattctgtaCCTCAGCTTCCCGATATCCGACGGTAGTGTgagcaaatataacct       |
| SEMA3E_1409 | ataagtgaggcactttcctaaaCCTCAGCTTCCCGATATCCGACGGTAGTGTaaagtcataactctggc  |
| SEMA3E_1411 | atgctcagcaattacaccCCTCAGCTTCCCGATATCCGACGGTAGTGTcatttttctctattttt      |
| SEMA3E_1410 | catctctgtcttattgtcaggCCTCAGCTTCCCGATATCCGACGGTAGTGTgtgagataagcaagcat   |
| SEMA3E_1412 | aacaattcactactacacggCCTCAGCTTCCCGATATCCGACGGTAGTGTacatactctttctctatc   |
| SEMA3E_1413 | gctggactctacagtactctCCTCAGCTTCCCGATATCCGACGGTAGTGTatagatataatgtcata    |
| SEMA3E_1414 | cctctctcagatctgggtgaCCTCAGCTTCCCGATATCCGACGGTAGTGTaaagaatgtaactgaattg  |
| SEMA3E_1415 | gatgtccttttgacccagcCCTCAGCTTCCCGATATCCGACGGTAGTGTgaagtttcatatgtttacc   |
| SEMA3E_1416 | cccgaacataattgacattCCTCAGCTTCCCGATATCCGACGGTAGTGTtgtttttattgacagcaa    |
| SEMA3E_1417 | cactataacaggacacaccttCCTCAGCTTCCCGATATCCGACGGTAGTGTaaacatgacttctagg    |
| SEMA3E_1419 | gattcattgtaaataaacaaatCCTCAGCTTCCCGATATCCGACGGTAGTGTtttcagtgtggtttat   |
| SEMA3E_1418 | ataaacacactgaaaccatttCCTCAGCTTCCCGATATCCGACGGTAGTGTtaattacaatgaatc     |
| SEMA3E_1420 | gcagcattgtatggagatcaaCCTCAGCTTCCCGATATCCGACGGTAGTGTccttttctactctactga  |
| SEMA3E_1421 | caagagaggctcttctgggaCCTCAGCTTCCCGATATCCGACGGTAGTGTattacattttctctgttg   |
| SEMA3E_1422 | gtccagtaagtaacccacCCTCAGCTTCCCGATATCCGACGGTAGTGTacgacttttttcttttt      |
| SEMA3E_1423 | ggacaggaggtcatacagctCCTCAGCTTCCCGATATCCGACGGTAGTGTgaggggaagtctaagtaaa  |

|            |                                                                         |
|------------|-------------------------------------------------------------------------|
| KCNQ3_1534 | gtcgtccacaggggatgggattCTTCAGCTTCCCGATATCCGACGGTAGTGTcccagagacagatgatt   |
| KCNQ3_1533 | gtctgtgtcgtctcacctcCTTCAGCTTCCCGATATCCGACGGTAGTGTctacattacaaggggggt     |
| KCNQ3_1535 | gtctcgtgatgctactctctCTTCAGCTTCCCGATATCCGACGGTAGTGTctcatccagctcgacc      |
| KCNQ3_1536 | gtccctgatgtcgtcaaccaCTTCAGCTTCCCGATATCCGACGGTAGTGTgctctgctacttgactc     |
| KCNQ3_1538 | cagcaacaacgatgtgagagCTTCAGCTTCCCGATATCCGACGGTAGTGTgaaccacctacagcttc     |
| KCNQ3_1537 | ggggcaggttcacaggggtcaCTTCAGCTTCCCGATATCCGACGGTAGTGTggtcagcctgggagtgccag |
| KCNQ3_1539 | gcccttggttgggtaatactcCTTCAGCTTCCCGATATCCGACGGTAGTGTgtcaatggctcacctggt   |
| KCNQ3_1540 | cgccagctgaagcagagaagCTTCAGCTTCCCGATATCCGACGGTAGTGTtcacagctctttgatttc    |
| KCNQ3_1541 | gtctcagtctgtcaccaggcCTTCAGCTTCCCGATATCCGACGGTAGTGTtctcccatgtcctgaac     |
| KCNQ3_1543 | gatctgtacatttatttcaCTTCAGCTTCCCGATATCCGACGGTAGTGTtctgctctcttaggaat      |
| KCNQ3_1542 | cgaacacttctataagatcattaCTTCAGCTTCCCGATATCCGACGGTAGTGTccagtttttggtgaga   |
| KCNQ3_1544 | catatctattctgaaagaacaaaCTTCAGCTTCCCGATATCCGACGGTAGTGTgcaccctggcccat     |
| KCNQ3_1545 | ggacctccctcacgcaaaaCTTCAGCTTCCCGATATCCGACGGTAGTGTtctatattccaacct        |
| KCNQ3_1546 | cctcaaagtctcttgaattttCTTCAGCTTCCCGATATCCGACGGTAGTGTtagggctttaggggag     |
| KCNQ3_1547 | gatgtgattgagcagatctctCTTCAGCTTCCCGATATCCGACGGTAGTGTgctctctgttatagctcc   |
| KCNQ3_1548 | catctgggagggagacacatatCTTCAGCTTCCCGATATCCGACGGTAGTGTggcacaggtgggaccg    |
| KCNQ3_1549 | cggaagacaggggctatgggaCTTCAGCTTCCCGATATCCGACGGTAGTGTggggattgacacatccag   |
| KCNQ3_1550 | gactttctctatggcatctacaCTTCAGCTTCCCGATATCCGACGGTAGTGTgaagagacaggggga     |
| KCNQ3_1551 | gaaccaaagcctgttggcttaCTTCAGCTTCCCGATATCCGACGGTAGTGTtttgcctattttgtagcca  |
| KCNQ3_1552 | cggtcatttcacagtgctgaatCTTCAGCTTCCCGATATCCGACGGTAGTGTtccaagagaccagctt    |
| KCNQ3_1554 | gaattcccttctcacatctctCTTCAGCTTCCCGATATCCGACGGTAGTGTgagaagcttgcagcaa     |
| KCNQ3_1553 | gcttctctgaagatgatggCTTCAGCTTCCCGATATCCGACGGTAGTGTtaggaaatcataacagaa     |
| KCNQ3_1556 | ggggactcacctgaatgctcagCTTCAGCTTCCCGATATCCGACGGTAGTGTcattgttgcctctttt    |
| KCNQ3_1555 | aaagaggggcaacaatgagtgCTTCAGCTTCCCGATATCCGACGGTAGTGTcattcagtgagtcccca    |
| KCNQ3_1558 | atgaaactggaatgggattaagatCTTCAGCTTCCCGATATCCGACGGTAGTGTcctgctctccctccag  |
| KCNQ3_1557 | gaggcaggcaggcagtcaccCTTCAGCTTCCCGATATCCGACGGTAGTGTtccagttcatccaggca     |
| KCNQ3_1559 | cagtgtgatctgaagagagaaCTTCAGCTTCCCGATATCCGACGGTAGTGTggggatgcatatatcaa    |
| KCNQ3_1560 | acaagacacccaaaactgtggaaCTTCAGCTTCCCGATATCCGACGGTAGTGTtggccaagctgatgga   |
| KCNQ3_1561 | aaccaggtagacaagaatgaaCTTCAGCTTCCCGATATCCGACGGTAGTGTgacagctcaatctcacaga  |
| KCNQ3_1562 | aggtaggtgcacaagagagaaCTTCAGCTTCCCGATATCCGACGGTAGTGTgactccccagtgaccact   |
| KCNQ3_1563 | atctgcaggaagcgaggcttcCTTCAGCTTCCCGATATCCGACGGTAGTGTggcataggtgggtggaa    |
| KCNQ3_1564 | gcacctggaagcttctgggcCTTCAGCTTCCCGATATCCGACGGTAGTGTcagacatctttgtgctgatt  |
| KCNQ3_1565 | agcatgtccaagcagtgaggacaCTTCAGCTTCCCGATATCCGACGGTAGTGTaaccactggcacagagg  |
| KCNQ3_1566 | atgaaaatagcaaatgtctcctCTTCAGCTTCCCGATATCCGACGGTAGTGTgaggctcagggtcagga   |
| KCNQ3_1567 | ggagccgagtttctttaggCTTCAGCTTCCCGATATCCGACGGTAGTGTgacaacagcacaatgga      |
| KCNQ3_1569 | attgattctgggtaaatgctCTTCAGCTTCCCGATATCCGACGGTAGTGTtaggttctttagtccattt   |
| KCNQ3_1568 | aaatggactaaggaacttgaCTTCAGCTTCCCGATATCCGACGGTAGTGTttaccagaatgcaat       |
| KCNQ3_1571 | ggattctcatttggggatgataCTTCAGCTTCCCGATATCCGACGGTAGTGTgaccttgtctgccat     |
| KCNQ3_1570 | gcagacaaggtcaagataaaaCTTCAGCTTCCCGATATCCGACGGTAGTGTtcaaaatgagaatccaaag  |
| KCNQ3_1572 | gtacttggcgttcttctgacCTTCAGCTTCCCGATATCCGACGGTAGTGTccaagtccccagcgc       |
| KCNQ3_1573 | ggcgcatacaactttgatctaCTTCAGCTTCCCGATATCCGACGGTAGTGTgacaaagcgggacctg     |
| KCNQ3_1574 | ccctcggctgggttagccgCTTCAGCTTCCCGATATCCGACGGTAGTGTtcggcgcgcccctcca       |
| KCNQ3_1575 | acgcggcggcggcggcagcCTTCAGCTTCCCGATATCCGACGGTAGTGTgagcggagaaggcgaagcgg   |
| APBA1_1577 | aggactctcctctggttCTTCAGCTTCCCGATATCCGACGGTAGTGTccccactaaagtgtgtt        |
| APBA1_1576 | gtaaaagaacaccttagtggCTTCAGCTTCCCGATATCCGACGGTAGTGTcacaaccaggaaggag      |
| APBA1_1579 | cacgagaagatgtccacattCTTCAGCTTCCCGATATCCGACGGTAGTGTaatgagggtaactgtcct    |
| APBA1_1578 | acgctcctctcagctattcCTTCAGCTTCCCGATATCCGACGGTAGTGTcagcaccacctcagcc       |
| APBA1_1580 | actcgggactgattcttaagCTTCAGCTTCCCGATATCCGACGGTAGTGTtgtggaaaaggggtgga     |
| APBA1_1581 | aagctgaatatcgtgagatgctCTTCAGCTTCCCGATATCCGACGGTAGTGTtccggaagcagtgca     |
| APBA1_1582 | caccatgcatcatgttggcaCTTCAGCTTCCCGATATCCGACGGTAGTGTactgattttcccatattca   |
| APBA1_1583 | gagaaatctgggaagctgaataCTTCAGCTTCCCGATATCCGACGGTAGTGTtttttctctccaggt     |
| APBA1_1584 | gggacaccaaccagatgagCTTCAGCTTCCCGATATCCGACGGTAGTGTcctttctgctctctatgaa    |
| APBA1_1585 | gttaatccattggccctgaggCTTCAGCTTCCCGATATCCGACGGTAGTGTggagaacagctccaggt    |
| APBA1_1586 | gatctcagcagaaggatagatCTTCAGCTTCCCGATATCCGACGGTAGTGTgactgcctctgctgac     |
| APBA1_1587 | gagttggagcaggcatccgCTTCAGCTTCCCGATATCCGACGGTAGTGTgcaagagaaactaaccaa     |
| APBA1_1588 | ccacctatccaggatgggaaaCTTCAGCTTCCCGATATCCGACGGTAGTGTgctccaggagacaatga    |
| APBA1_1589 | catgcagggtgggctccaggCTTCAGCTTCCCGATATCCGACGGTAGTGTtaggaaatggctccagag    |
| APBA1_1591 | agctggctccaccttccaCTTCAGCTTCCCGATATCCGACGGTAGTGTtgtgtcaaaccttctctt      |
| APBA1_1590 | caagagaaaattgaccacactaCTTCAGCTTCCCGATATCCGACGGTAGTGTgaaaggtggaagccagc   |
| APBA1_1593 | gcctgttctttcattcgttCTTCAGCTTCCCGATATCCGACGGTAGTGTtctttagtctctacacatt    |
| APBA1_1592 | agactcaaagtcaaaaagggaaCTTCAGCTTCCCGATATCCGACGGTAGTGTagaacaggcatacacca   |
| APBA1_1594 | attccatgatcaagtctcggCTTCAGCTTCCCGATATCCGACGGTAGTGTtggagcaccagatgt       |
| APBA1_1595 | gccaattacctggctcactcCTTCAGCTTCCCGATATCCGACGGTAGTGTgagagggagatgtgcca     |
| APBA1_1597 | aaagaaaatactgagcactgagCTTCAGCTTCCCGATATCCGACGGTAGTGTtcatgttcatggatgat   |
| APBA1_1596 | cacaatcatcatgcaacatgCTTCAGCTTCCCGATATCCGACGGTAGTGTactcagtgctcagatattt   |

|            |                                                                        |
|------------|------------------------------------------------------------------------|
| APBA1_1599 | gtgctgtttttgttaccaaagccCTTCAGCTTCCCGATATCCGACGGTAGTGTtactgtgtttctcttg  |
| APBA1_1598 | caagaggaaacacagtgagaacCTTCAGCTTCCCGATATCCGACGGTAGTGTtggtaacaaacagcac   |
| APBA1_1601 | gggtcatgcccaggacattagCTTCAGCTTCCCGATATCCGACGGTAGTGTcagggtacagcaaggag   |
| APBA1_1600 | ggatggctctgttttccctccCTTCAGCTTCCCGATATCCGACGGTAGTGTgaagccaaacccgcac    |
| APBA1_1602 | gtaggggagcgtccaggctctCTTCAGCTTCCCGATATCCGACGGTAGTGTtagcagatggcatcgcg   |
| APBA1_1603 | cggccgggggtcggccgacCTTCAGCTTCCCGATATCCGACGGTAGTGTacagctacagcaggaggag   |
| APBA1_1604 | cagggcctcctggcggtagCTTCAGCTTCCCGATATCCGACGGTAGTGTggcactatctgtgctgct    |
| APBA1_1605 | gcgcgcgctgcaccattacCTTCAGCTTCCCGATATCCGACGGTAGTGTccgactacggcggcctccag  |
| APBA1_1606 | gtgtccagcagtggaagtgCTTCAGCTTCCCGATATCCGACGGTAGTGTtctctctgtacagctgct    |
| APBA1_1607 | aggaagcatgaatgctgctctCTTCAGCTTCCCGATATCCGACGGTAGTGTtagagcgcctatgctgtg  |
| APBA1_1608 | gtgtggttgggaagcgcctctCTTCAGCTTCCCGATATCCGACGGTAGTGTctgctcgtgtactctc    |
| APBA1_1609 | gacaccgaggggcagctgCTTCAGCTTCCCGATATCCGACGGTAGTGTactatgtggccgcccacca    |
| APBA1_1610 | caccgactgttccctccacCTTCAGCTTCCCGATATCCGACGGTAGTGTtctctctgcccagct       |
| APBA1_1611 | acccgaggtggaagaggaacCTTCAGCTTCCCGATATCCGACGGTAGTGTcggccagcttctctc      |
| KCNT1_862  | accggacttctgagtttgacacCTTCAGCTTCCCGATATCCGACGGTAGTGTaagaaggtggcgctcc   |
| KCNT1_863  | ggtgtagccccgcccgcCTTCAGCTTCCCGATATCCGACGGTAGTGTtctcggagggtgcccggagc    |
| KCNT1_864  | cctgctgctggcggaccctctCTTCAGCTTCCCGATATCCGACGGTAGTGTggggcgtggcgtgtg     |
| KCNT1_865  | cccgaagcggtagcggcCTTCAGCTTCCCGATATCCGACGGTAGTGTcggcggaccggcctcagca     |
| KCNT1_867  | gaagcagagggggcatggaggCTTCAGCTTCCCGATATCCGACGGTAGTGTcaacacctcctgctgg    |
| KCNT1_866  | ccaggcagggaggttggaggCTTCAGCTTCCCGATATCCGACGGTAGTGTcatgcccctctgctctc    |
| KCNT1_869  | gcacaatgtagagcaggcagtgCTTCAGCTTCCCGATATCCGACGGTAGTGTcccaggagcctatca    |
| KCNT1_868  | gccacgtgcccggcggcCTTCAGCTTCCCGATATCCGACGGTAGTGTtagcctgaggccgctgcct     |
| KCNT1_871  | ccccttagcaccactgcaaggaCTTCAGCTTCCCGATATCCGACGGTAGTGTctgagcctgctgctatt  |
| KCNT1_870  | caggggtgggtgggatgctctCTTCAGCTTCCCGATATCCGACGGTAGTGTccagcgtgtgtctctc    |
| KCNT1_873  | actagtgtccccagccaccctggCTTCAGCTTCCCGATATCCGACGGTAGTGTcactcagctgggag    |
| KCNT1_872  | ccccctcccagctcagtgCTTCAGCTTCCCGATATCCGACGGTAGTGTccaggggtggggggacac     |
| KCNT1_875  | ggagctctgagcaggcccggcctCTTCAGCTTCCCGATATCCGACGGTAGTGTgggagggggggacc    |
| KCNT1_874  | gggggtccccaccctcccaCTTCAGCTTCCCGATATCCGACGGTAGTGTccccggctgctcagagct    |
| KCNT1_877  | actctgccctcatcatcaCTTCAGCTTCCCGATATCCGACGGTAGTGTtccccaccctcccctccc     |
| KCNT1_876  | gcaaacggggggtatCTTCAGCTTCCCGATATCCGACGGTAGTGTacaggtcaggcctggggctccagg  |
| KCNT1_879  | gggatgaacaggttccgagcCTTCAGCTTCCCGATATCCGACGGTAGTGTactgcacagtgctctc     |
| KCNT1_878  | cgctggaaaacatgattgaagcCTTCAGCTTCCCGATATCCGACGGTAGTGTgagccccagctccag    |
| KCNT1_880  | ccttctgacacctgctgtCTTCAGCTTCCCGATATCCGACGGTAGTGTtctagtctctattattggc    |
| KCNT1_881  | gaggacctggtgaacatggcCTTCAGCTTCCCGATATCCGACGGTAGTGTgagacataggcatctgtatc |
| KCNT1_882  | gtcacgccaagatctggcCTTCAGCTTCCCGATATCCGACGGTAGTGTaggcccccctcactgccag    |
| KCNT1_883  | atgcagaagtagaaggagctcCTTCAGCTTCCCGATATCCGACGGTAGTGTctggtcccagaggacc    |
| KCNT1_884  | gcacagtggggggcactcCTTCAGCTTCCCGATATCCGACGGTAGTGTtgggtcatcatgatctgc     |
| KCNT1_886  | caggtggcggctgtagttgccccCTTCAGCTTCCCGATATCCGACGGTAGTGTcgtctgctggccacg   |
| KCNT1_885  | gtcagctccctcaagctcagctCTTCAGCTTCCCGATATCCGACGGTAGTGTgctcgtgtgctcacc    |
| KCNT1_887  | actcaagaccaggacctcatcgCTTCAGCTTCCCGATATCCGACGGTAGTGTgacctccgctggcc     |
| KCNT1_888  | cagagccctggagtagatgacctCTTCAGCTTCCCGATATCCGACGGTAGTGTtggccaggagagcga   |
| KCNT1_890  | gcaccagggcctgagcgtggcCTTCAGCTTCCCGATATCCGACGGTAGTGTccccgctccccgcccc    |
| KCNT1_889  | gggcccgggagcggggctcctCTTCAGCTTCCCGATATCCGACGGTAGTGTctcaggccctggtgat    |
| KCNT1_892  | ggcagttggggcgaagtctctCTTCAGCTTCCCGATATCCGACGGTAGTGTcagatgacacatccca    |
| KCNT1_891  | acaagttcacgtcaagtttctCTTCAGCTTCCCGATATCCGACGGTAGTGTtagagccagccgctct    |
| KCNT1_893  | gacctccacctcatccctCTTCAGCTTCCCGATATCCGACGGTAGTGTtagtactgtggggaggga     |
| KCNT1_894  | ggcagatgagttcagcggcCTTCAGCTTCCCGATATCCGACGGTAGTGTcccggcagcaggcc        |
| KCNT1_895  | gcatgggtgacagcaagttctcCTTCAGCTTCCCGATATCCGACGGTAGTGTgaaggggagcagctggc  |
| KCNT1_896  | gatgtgtacacctggttggcCTTCAGCTTCCCGATATCCGACGGTAGTGTcagagcagagcagcct     |
| KCNT1_897  | aacatcaccaaggaggagaactCTTCAGCTTCCCGATATCCGACGGTAGTGTaagttgcccgtcctct   |
| KCNT1_898  | atgtagaagcaggtgtcagaggCTTCAGCTTCCCGATATCCGACGGTAGTGTggaggcagatgctgtg   |
| KCNT1_899  | gtgaccaggtgggatgggagaccaCTTCAGCTTCCCGATATCCGACGGTAGTGTggggctgcagcagggt |
| KCNT1_900  | cggcggcccagcatcgcccCTTCAGCTTCCCGATATCCGACGGTAGTGTcaaagcagaggctctct     |
| KCNT1_901  | gcccagccgttctcgtggcaCTTCAGCTTCCCGATATCCGACGGTAGTGTtaccagggagaccct      |
| KCNT1_902  | ccttgggtgtccccatgctctCTTCAGCTTCCCGATATCCGACGGTAGTGTccagtcggaggatgaggt  |
| KCNT1_903  | acaaggttaaggctggcgtctCTTCAGCTTCCCGATATCCGACGGTAGTGTgtgctgagggtcctgtc   |
| KCNT1_904  | ggccttccacaggcaggagctCTTCAGCTTCCCGATATCCGACGGTAGTGTcaatggtatgaaatgtaa  |
| KCNT1_905  | atgggtgtacaactctctgCTTCAGCTTCCCGATATCCGACGGTAGTGTaccagaccctgactcc      |
| KCNT1_906  | gcttgttctgaaccctaggcCTTCAGCTTCCCGATATCCGACGGTAGTGTcaggagcctcacttgtg    |
| KCNT1_907  | gcaggggaaatggggcctctCTTCAGCTTCCCGATATCCGACGGTAGTGTctaaccctcgtgctg      |
| KCNT1_909  | cagggcagtgggccctaccCTTCAGCTTCCCGATATCCGACGGTAGTGTcttactgtccacagagcc    |
| KCNT1_908  | acaccaccctcccctctctCTTCAGCTTCCCGATATCCGACGGTAGTGTtccaggaccctgtccc      |
| KCNT1_911  | gcaggctgtccagcgtggtggcCTTCAGCTTCCCGATATCCGACGGTAGTGTggagcaccggaaatg    |
| KCNT1_910  | gtggacaaggagagcaccatgaCTTCAGCTTCCCGATATCCGACGGTAGTGTctctgacaaatcccgg   |
| KCNT1_912  | agacccccacagccagaccacCTTCAGCTTCCCGATATCCGACGGTAGTGTccatctgaacgtcaga    |

|               |                                                                         |
|---------------|-------------------------------------------------------------------------|
| KCNT1_914     | gtgggtgagctccgtggtgatCTTCAGCTTCCCGATATCCGACGGTAGTGTttctccactctttctgg    |
| KCNT1_913     | ctactctctggctcttccaacCTTCAGCTTCCCGATATCCGACGGTAGTGTtctcaacaaccatg       |
| KCNT1_915     | gcatgttgacacactgctctacCTTCAGCTTCCCGATATCCGACGGTAGTGTgccactggaggacctc    |
| KCNT1_916     | gatgctgaagacgcccggCTTCAGCTTCCCGATATCCGACGGTAGTGTtcagaggagctctatcatt     |
| KCNT1_918     | ccgggtgatggtgatcatgtagtCTTCAGCTTCCCGATATCCGACGGTAGTGTcctggaatcaggggcag  |
| KCNT1_917     | gtacctctgtgccgtaagtccCTTCAGCTTCCCGATATCCGACGGTAGTGTactgtggctccctccctc   |
| KCNT1_920     | ggaggagcagagcttctggaagCTTCAGCTTCCCGATATCCGACGGTAGTGTaaggtggggatgctgtgg  |
| KCNT1_919     | ccagctcttccacctcggagCTTCAGCTTCCCGATATCCGACGGTAGTGTaactcagggttcccacc     |
| KCNT1_922     | aaggaaacagcgagctcgggaCTTCAGCTTCCCGATATCCGACGGTAGTGTcctgtgggtgggtgggt    |
| KCNT1_921     | ggagcaccagaacatcgagcttCTTCAGCTTCCCGATATCCGACGGTAGTGTtagaccaggctgaggc    |
| KCNT1_924     | cccttcacttcccgtgtctcaCTTCAGCTTCCCGATATCCGACGGTAGTGTccttgcggctcagctt     |
| KCNT1_923     | gccccacacggggcgggtCTTCAGCTTCCCGATATCCGACGGTAGTGTcaccctcccgcctcc         |
| KCNT1_925     | gagctggtgaagaaccgatgaaCTTCAGCTTCCCGATATCCGACGGTAGTGTaagagcctgcagtgggc   |
| KCNT1_926     | gagagctctggcgtcagagCTTCAGCTTCCCGATATCCGACGGTAGTGTggccgactgtcttggct      |
| KCNT1_928     | cagcctgccctccagctCTTCAGCTTCCCGATATCCGACGGTAGTGTggtgactcacacaatgct       |
| KCNT1_927     | gcacctgtgggctgtgtggagacCTTCAGCTTCCCGATATCCGACGGTAGTGTgggggggtgactctg    |
| KCNT1_929     | gagacacagctctgagccaccCTTCAGCTTCCCGATATCCGACGGTAGTGTaggctctctgtccctc     |
| KCNT1_930     | gggttgacagacagcctgtgCTTCAGCTTCCCGATATCCGACGGTAGTGTcatccccagggtcacgc     |
| SLC25A2_1706  | aagtagaccactgtgctgctgCTTCAGCTTCCCGATATCCGACGGTAGTGTtcccaggctgagct       |
| SLC25A2_1707  | gggatcgcggagctccctgctgggCTTCAGCTTCCCGATATCCGACGGTAGTGTacccttctgctctcc   |
| SLC25A2_1708  | gtcttcaccactgcaagggcgCTTCAGCTTCCCGATATCCGACGGTAGTGTaaggacgaagggctcagc   |
| SLC25A2_1709  | cgtcaacgaggacacctactctCTTCAGCTTCCCGATATCCGACGGTAGTGTcctgtgatgctcagctc   |
| SLC25A2_1710  | gtagaaggcactctctcctggaCTTCAGCTTCCCGATATCCGACGGTAGTGTgtgagcctggccaag     |
| SLC25A2_1711  | gtccttctggcggcgtgtgCTTCAGCTTCCCGATATCCGACGGTAGTGTccacctctgtcccacg       |
| SLC25A2_1712  | cactgaggcctgggacacccccCTTCAGCTTCCCGATATCCGACGGTAGTGTcccactgctctgctt     |
| SLC25A2_1713  | cggccacggccaccagctgaCTTCAGCTTCCCGATATCCGACGGTAGTGTcccagttccacagaaga     |
| SLC25A2_1715  | cacgcccagagatgctgaagaCTTCAGCTTCCCGATATCCGACGGTAGTGTcccagggtggcaggta     |
| SLC25A2_1714  | cagcccgcagcatctcttaagCTTCAGCTTCCCGATATCCGACGGTAGTGTaccctcttcccaccta     |
| SLC25A2_1716  | gttcacagcagctctgtgggCTTCAGCTTCCCGATATCCGACGGTAGTGTatcctttatctgaagccaa   |
| SLC25A2_1717  | gagaaggccatcaagctggcagCTTCAGCTTCCCGATATCCGACGGTAGTGTgggacagggttttgcca   |
| SLC25A2_1719  | gtttggctcggtgggctcagCTTCAGCTTCCCGATATCCGACGGTAGTGTacagtcaggaccctgg      |
| SLC25A2_1718  | ccagggtccctgactgtctagCTTCAGCTTCCCGATATCCGACGGTAGTGTgcccagcggaccaaac     |
| SLC25A2_1721  | cgtgtacacgagcatgtgagtgCTTCAGCTTCCCGATATCCGACGGTAGTGTgacacccctgtccacaca  |
| SLC25A2_1720  | aacacgaggtgacaccgatcagCTTCAGCTTCCCGATATCCGACGGTAGTGTgacccccacctctctg    |
| SLC25A2_1724  | gtgcctcaccaccctgaccCTTCAGCTTCCCGATATCCGACGGTAGTGTtccctcaaggcctctc       |
| SLC25A2_1722  | actcattgaccaccagtaggaCTTCAGCTTCCCGATATCCGACGGTAGTGTattgatgagcttggctgg   |
| PRICKLE1_1778 | gtcatctgtatagtaggcaaatCTTCAGCTTCCCGATATCCGACGGTAGTGTcaatgctctgcatcac    |
| PRICKLE1_1779 | gtccacctctgacttccaCTTCAGCTTCCCGATATCCGACGGTAGTGTcaggatgatgattctctgg     |
| PRICKLE1_1780 | gtagagatcagcattctgtagtCTTCAGCTTCCCGATATCCGACGGTAGTGTtcttccgagtcggaag    |
| PRICKLE1_1781 | gacagtacgcccactcactCTTCAGCTTCCCGATATCCGACGGTAGTGTatcttgttcagaaagaaaa    |
| PRICKLE1_1782 | ccgagctcttactcatcggaCTTCAGCTTCCCGATATCCGACGGTAGTGTgtctgcttgggagagt      |
| PRICKLE1_1783 | gacgctctacaatttgaagagCTTCAGCTTCCCGATATCCGACGGTAGTGTatctcagctgctcaga     |
| PRICKLE1_1784 | caaagtcccattatgctcatctCTTCAGCTTCCCGATATCCGACGGTAGTGTgagattgagactggacc   |
| PRICKLE1_1785 | acttctcatgctgcacaggaCTTCAGCTTCCCGATATCCGACGGTAGTGTgtttggcctctcttcta     |
| PRICKLE1_1786 | atatttgattaaaaccataggaCTTCAGCTTCCCGATATCCGACGGTAGTGTtctccatccaccgaa     |
| PRICKLE1_1787 | atgattatacctgaagcccaCTTCAGCTTCCCGATATCCGACGGTAGTGTcccataatccctagatt     |
| PRICKLE1_1788 | atgaaacacagtgatgaagaCTTCAGCTTCCCGATATCCGACGGTAGTGTtctgatgatgactgggca    |
| PRICKLE1_1789 | aatatccatctcattggctgCTTCAGCTTCCCGATATCCGACGGTAGTGTcccagtcactctgtgact    |
| PRICKLE1_1790 | gagccagtgagcactggatcCTTCAGCTTCCCGATATCCGACGGTAGTGTggcagagtagagcaggaa    |
| PRICKLE1_1791 | gaggccaggaaactgtagttcCTTCAGCTTCCCGATATCCGACGGTAGTGTtctcagggtcttctggag   |
| PRICKLE1_1792 | caatgctgatgacaccttctcCTTCAGCTTCCCGATATCCGACGGTAGTGTtcagtcagctcagatcaa   |
| PRICKLE1_1793 | catccaacaagaggctttacaCTTCAGCTTCCCGATATCCGACGGTAGTGTacactcttccggagtc     |
| PRICKLE1_1794 | acagggtcagattactgctcCTTCAGCTTCCCGATATCCGACGGTAGTGTtctatcttccaacacag     |
| PRICKLE1_1795 | gggtgacacagatataattaatccCTTCAGCTTCCCGATATCCGACGGTAGTGTctgtgatggtccaca   |
| PRICKLE1_1797 | agtactgtgaaacctgtgggaaCTTCAGCTTCCCGATATCCGACGGTAGTGTctgagggtcgccattgg   |
| PRICKLE1_1796 | cttcatgatatacctctgtccCTTCAGCTTCCCGATATCCGACGGTAGTGTccaagacagactaatgg    |
| PRICKLE1_1798 | gccaagtaactgcatgtttctcCTTCAGCTTCCCGATATCCGACGGTAGTGTtcaaggcagcagaagtg   |
| PRICKLE1_1799 | acgtgaaacagacaaacaggCTTCAGCTTCCCGATATCCGACGGTAGTGTgtgaaggatgaaactttt    |
| PRICKLE1_1800 | gagctgctgtgcacctcctcCTTCAGCTTCCCGATATCCGACGGTAGTGTcttttcaatcaaacctat    |
| PRICKLE1_1801 | aacacctgcaactcttttctCTTCAGCTTCCCGATATCCGACGGTAGTGTccacatcactgccacaag    |
| PRICKLE1_1802 | gaagaaagaagcactgggaagCTTCAGCTTCCCGATATCCGACGGTAGTGTgaagtagagaactggtgag  |
| PRICKLE1_1803 | gcaagcaaatagagctggaCTTCAGCTTCCCGATATCCGACGGTAGTGTtcttcttttctaatagc      |
| PRICKLE1_1804 | cagaggaaaagttccttactgtaCTTCAGCTTCCCGATATCCGACGGTAGTGTtagaggcaaacctctg   |
| PRICKLE1_1805 | aaggccagtttctcatctCTTCAGCTTCCCGATATCCGACGGTAGTGTctgaaaaacaaagatgaaat    |
| PRICKLE1_1806 | ggctgtcagagaagttccacCTTCAGCTTCCCGATATCCGACGGTAGTGTtcagggttttagatgtctttg |



|            |                                                                         |
|------------|-------------------------------------------------------------------------|
| SCN8A_1807 | caagaaaccaccaaggccgatCTTCAGCTTCCCGATATCCGACGGTAGTGTaactaacgaagctgctgc   |
| SCN8A_1808 | gcgctctcaatgtttgccagCTTCAGCTTCCCGATATCCGACGGTAGTGTatgtccccgtagatgaaag   |
| SCN8A_1809 | atacctgtttcctaacaggcttCTTCAGCTTCCCGATATCCGACGGTAGTGTggaagcagggaaagatt   |
| SCN8A_1810 | acctgataaagaatagctattCTTCAGCTTCCCGATATCCGACGGTAGTGTgactcataccatgctc     |
| SCN8A_1811 | aatgtacaaggcaggcgtggcCTTCAGCTTCCCGATATCCGACGGTAGTGTccagttgtcaaatattgga  |
| SCN8A_1813 | gaagagtcaaggggcaatattCTTCAGCTTCCCGATATCCGACGGTAGTGTaaacaacaagcacacac    |
| SCN8A_1812 | gtgtgtctgtttgttttaaatCTTCAGCTTCCCGATATCCGACGGTAGTGTtggcccttgactcttc     |
| SCN8A_1814 | ggaactggttagattcagtgCTTCAGCTTCCCGATATCCGACGGTAGTGTcagaaattacctcaagct    |
| SCN8A_1815 | cccgtaaaaaggtaaagccatCTTCAGCTTCCCGATATCCGACGGTAGTGTccacaatgcacacctaca   |
| SCN8A_1817 | caaaccaagttaactgtaatggCTTCAGCTTCCCGATATCCGACGGTAGTGTcctaaccaaccctcg     |
| SCN8A_1816 | ggttgggttaggtgtgggCTTCAGCTTCCCGATATCCGACGGTAGTGTaagtaactttggttgatt      |
| SCN8A_1818 | gtgttttgccttgatcggactCTTCAGCTTCCCGATATCCGACGGTAGTGTggggagggttgaggt      |
| SCN8A_1819 | caggcagaactgtcaggaCTTCAGCTTCCCGATATCCGACGGTAGTGTgataactcttccaatcaa      |
| SCN8A_1820 | aaaagtagttggaggccgggcCTTCAGCTTCCCGATATCCGACGGTAGTGTtgaaaatggcaccaaagg   |
| SCN8A_1822 | aaagttgaagaggcaggaaaCTTCAGCTTCCCGATATCCGACGGTAGTGTaccctactaataacaggta   |
| SCN8A_1821 | gtacctgttattagtagggtcaaCTTCAGCTTCCCGATATCCGACGGTAGTGTcctgctcttcaaactt   |
| SCN8A_1823 | ccttatgaccaggactattCTTCAGCTTCCCGATATCCGACGGTAGTGTaagctgaactcccttt       |
| SCN8A_1824 | gaaataatgccaagaaggcccCTTCAGCTTCCCGATATCCGACGGTAGTGTtcttcaataatgtctctc   |
| SCN8A_1825 | gcttatgaagaacagaatcaggCTTCAGCTTCCCGATATCCGACGGTAGTGTactcagaatggccttt    |
| SCN8A_1826 | acagccaagatcaagttcaccCTTCAGCTTCCCGATATCCGACGGTAGTGTagaattcataccaactg    |
| SCN8A_1827 | gccattggctgatgaaaataaCTTCAGCTTCCCGATATCCGACGGTAGTGTgaagcaacaggaaagaggc  |
| SCN8A_1828 | cagctcaaagagtcaaaggaaaCTTCAGCTTCCCGATATCCGACGGTAGTGTcctgctgtggctcttt    |
| SCN8A_1829 | gttagagattcagaagagctCTTCAGCTTCCCGATATCCGACGGTAGTGTtcttcatgccatcttct     |
| SCN8A_1830 | ccatcatgaatcaggtaaacCTTCAGCTTCCCGATATCCGACGGTAGTGTtaggaagaaaaggaaactc   |
| SCN8A_1831 | aattcctccctattctgttCTTCAGCTTCCCGATATCCGACGGTAGTGTttaaactgaacgggtac      |
| SCN8A_1832 | agaatgagttcgggatgacgCTTCAGCTTCCCGATATCCGACGGTAGTGTctctcttccctgtctg      |
| SCN8A_1833 | ggaaccgcccaggtcccctgaaCTTCAGCTTCCCGATATCCGACGGTAGTGTctgtagccgtgtagctg   |
| SCN8A_1834 | ggactgcaacggcgtgtgtcCTTCAGCTTCCCGATATCCGACGGTAGTGTtccctcttaccctatcc     |
| SCN8A_1835 | ccgtgctgttgccctcagCTTCAGCTTCCCGATATCCGACGGTAGTGTgctccgatctattgtgttc     |
| SCN8A_1836 | cctacgggcggaaggacagaCTTCAGCTTCCCGATATCCGACGGTAGTGTgccagattacctttatag    |
| SCN8A_1837 | atcagggccttctcttaaCTTCAGCTTCCCGATATCCGACGGTAGTGTatatctcagcggttggact     |
| SCN8A_1838 | aagagatttgaactgatagtaCTTCAGCTTCCCGATATCCGACGGTAGTGTtagggggccatcttg      |
| SCN8A_1839 | ccagtagggtggcactcccCTTCAGCTTCCCGATATCCGACGGTAGTGTatgttcaaatgtgtgtca     |
| SCN8A_1840 | actgaaagctggagtttcttgaCTTCAGCTTCCCGATATCCGACGGTAGTGTcaatggagaccatcct    |
| SCN8A_1841 | gttggaaacttttgacgattCTTCAGCTTCCCGATATCCGACGGTAGTGTtagcattctcttctact     |
| SCN8A_1842 | atccatggctatgacttcaCTTCAGCTTCCCGATATCCGACGGTAGTGTaatatggaataccaatcggga  |
| SCN8A_1843 | gtattttactccaattccagttCTTCAGCTTCCCGATATCCGACGGTAGTGTgctttcagtgctcgat    |
| SCN8A_1844 | ccctgggcaactgacactCTTCAGCTTCCCGATATCCGACGGTAGTGTtagaaaaatgattgagat      |
| SCN8A_1845 | accactgaatttccaataatctCTTCAGCTTCCCGATATCCGACGGTAGTGTgaggaggattcacagt    |
| SCN8A_1846 | gactgcatggaagtggcaggCTTCAGCTTCCCGATATCCGACGGTAGTGTaaaagctacaagagtgtgt   |
| SCN8A_1847 | cacatggctcaatccactccCTTCAGCTTCCCGATATCCGACGGTAGTGTccagggttagaatattcag   |
| SCN8A_1848 | gtatcaagaagggtgtggcctCTTCAGCTTCCCGATATCCGACGGTAGTGTctttttccaatgctactg   |
| SCN8A_1849 | gatcactgagatctggagggtCTTCAGCTTCCCGATATCCGACGGTAGTGTcgatacagttggccttct   |
| SCN8A_1850 | acatcattgatgaggaccacaCTTCAGCTTCCCGATATCCGACGGTAGTGTtctggatgagttgatgaa   |
| SCN8A_1851 | ccaatgccgctggtgtgccCTTCAGCTTCCCGATATCCGACGGTAGTGTctgtaaacctcctgtgtt     |
| SCN8A_1852 | gtgtgagagcaaacagggtgctCTTCAGCTTCCCGATATCCGACGGTAGTGTgactgtacgggtaccat   |
| SCN8A_1853 | gcttcacagaaggtgaaagggCTTCAGCTTCCCGATATCCGACGGTAGTGTtctctcttctcttgcgt    |
| SCN8A_1854 | atccaagtattcctcaggctgtCTTCAGCTTCCCGATATCCGACGGTAGTGTcttgaagatagccactga  |
| SCN8A_1855 | caactggtttgagaccttcatctCTTCAGCTTCCCGATATCCGACGGTAGTGTtctgaccgcctcttc    |
| SCN8A_1856 | cacgatgaggaagcagggtttcCTTCAGCTTCCCGATATCCGACGGTAGTGTgcttttccaactggcct   |
| SCN8A_1857 | gttctcaagtggacagcctatgCTTCAGCTTCCCGATATCCGACGGTAGTGTgactgtcataggcagc    |
| SCN8A_1858 | ggtgaagactttgtcagcatatCTTCAGCTTCCCGATATCCGACGGTAGTGTtaggggtgggaaacagaaa |
| SCN8A_1859 | atttgaaggatgagggttaagataCTTCAGCTTCCCGATATCCGACGGTAGTGTtctctctgtttctg    |
| SCN8A_1860 | gggtctcaaagctttaggtCTTCAGCTTCCCGATATCCGACGGTAGTGTtctgtttgaatgatctt      |
| SCN8A_1861 | gggaaagtaccactactgctttaaCTTCAGCTTCCCGATATCCGACGGTAGTGTcaacctccccctcaa   |
| SCN8A_1862 | caacaagttaactccatgatgCTTCAGCTTCCCGATATCCGACGGTAGTGTcagttcttccatctg      |
| SCN8A_1863 | aggcagctagcacaataccaCTTCAGCTTCCCGATATCCGACGGTAGTGTgaggggaacaatacacagaga |
| SCN8A_1865 | gtgcctataaaggagtgaggCTTCAGCTTCCCGATATCCGACGGTAGTGTctttccagcatctgag      |
| SCN8A_1864 | cagcatggtataaccagcccaCTTCAGCTTCCCGATATCCGACGGTAGTGTtctaataactgactctgtt  |
| SCN8A_1866 | cctgttcattgggtcatcattCTTCAGCTTCCCGATATCCGACGGTAGTGTctaggagctgattctctt   |
| SCN8A_1867 | cagggtgaagaaggagccgaCTTCAGCTTCCCGATATCCGACGGTAGTGTtttcttctagataggg      |
| SCN8A_1869 | agcccagcttttcatgcaCTTCAGCTTCCCGATATCCGACGGTAGTGTgcaatcactaccttttct      |
| SCN8A_1868 | gtaagtgcattgtcaggctgaCTTCAGCTTCCCGATATCCGACGGTAGTGTtctgttttcttctcct     |
| SCN8A_1870 | acactcaaagcaagcagatgCTTCAGCTTCCCGATATCCGACGGTAGTGTtatcttctcctccctcct    |
| SCN8A_1871 | gtctccacatcattgtcacaCTTCAGCTTCCCGATATCCGACGGTAGTGTgtccagccaatggtgaa     |

|            |                                                                        |
|------------|------------------------------------------------------------------------|
| SCN8A_1872 | atgagattcccaggagaggaatCTTCAGCTTCCCGATATCCGACGGTAGTGTgctgtgaggcactact   |
| SCN8A_1873 | caaagggattcgtaccctgcCTTCAGCTTCCCGATATCCGACGGTAGGTataacttctctattctct    |
| SCN8A_1874 | cgctttgatcagacgcaagCTTCAGCTTCCCGATATCCGACGGTAGTGTgcttcacatagcaaaattg   |
| SCN8A_1875 | gttgggatggcctgctgctCTTCAGCTTCCCGATATCCGACGGTAGTGTgttcatctctccatttt     |
| SCN8A_1876 | gctgaggtgtgatttgaaacCTTCAGCTTCCCGATATCCGACGGTAGTGTtagcttcaaaagaagaagat |
| SCN8A_1877 | cctctgagtggaggatgacttgaCTTCAGCTTCCCGATATCCGACGGTAGTGTgttgggaaccctcagt  |
| SCN8A_1878 | cactttctctgtggctactactCTTCAGCTTCCCGATATCCGACGGTAGTGTggagaggatgctccaag  |
| SCN8A_1879 | ccttttgccttcaccaagcCTTCAGCTTCCCGATATCCGACGGTAGTGTgagactgttaagctggcag   |
| SCN8A_1880 | atccccctcaccattggcaCTTCAGCTTCCCGATATCCGACGGTAGTGTctcgtaaacactttggaaag  |
| SCN8A_1881 | gcttcatctgcaaaaagacaactCTTCAGCTTCCCGATATCCGACGGTAGTGTgctggtctgtgcatcc  |
| SCN8A_1882 | gccttgcaaatgtccccggCTTCAGCTTCCCGATATCCGACGGTAGTGTtctcctttcaggttagtt    |
| SCN8A_1883 | gaggagaacaaaaattcagtattaCTTCAGCTTCCCGATATCCGACGGTAGTGTtccatctacagctccc |
| SCN8A_1884 | acacttgattctctgacctCTTCAGCTTCCCGATATCCGACGGTAGTGTgacgtttggtatagatctt   |
| FOXG1_1885 | ccacggccaccacaacagcaCTTCAGCTTCCCGATATCCGACGGTAGTGTccgtttcccccgagcact   |
| FOXG1_1886 | gtcgttctggaccgctcggcCTTCAGCTTCCCGATATCCGACGGTAGTGTgctggtgctgctgctgcg   |
| FOXG1_1887 | cgccgccaccgccaccgcCTTCAGCTTCCCGATATCCGACGGTAGTGTccccgcaaccgcccggccg    |
| FOXG1_1888 | cgggagcagcagctgctggggcCTTCAGCTTCCCGATATCCGACGGTAGTGTgcttctctctctctg    |
| FOXG1_1889 | agaagccgctttagctacaacCTTCAGCTTCCCGATATCCGACGGTAGTGTggcccccctggggccg    |
| FOXG1_1890 | gtacttccgttcttctctcCTTCAGCTTCCCGATATCCGACGGTAGTGTtcttctcctcggtagt      |
| FOXG1_1892 | aagcacttcttgagggacagattCTTCAGCTTCCCGATATCCGACGGTAGTGTccccgaggtggtgga   |
| FOXG1_1891 | actactggatgctggaccctCTTCAGCTTCCCGATATCCGACGGTAGTGTtctcatgaaagaacttc    |
| FOXG1_1893 | gtccctctactggcccctctCTTCAGCTTCCCGATATCCGACGGTAGTGTgctgacgactgttctatc   |
| FOXG1_1894 | gctgctcctgcaaggtgagcCTTCAGCTTCCCGATATCCGACGGTAGTGTgagcaaacggagctgta    |
| FOXG1_1895 | cggctgtcaacggggagatCTTCAGCTTCCCGATATCCGACGGTAGTGTgacagcactttagttcaaa   |
| FOXG1_1896 | cgggtggagaaggagtggttCTTCAGCTTCCCGATATCCGACGGTAGTGTgaggagtaggtcccagag   |
| FOXG1_1898 | cagggcaccgacaggccgagggcCTTCAGCTTCCCGATATCCGACGGTAGTGTccccctgggctcat    |
| FOXG1_1897 | gttactttttccccacgtcccCTTCAGCTTCCCGATATCCGACGGTAGTGTcccctacgccacgcac    |
| FOXG1_1899 | gactgtctgattattcacacatCTTCAGCTTCCCGATATCCGACGGTAGTGTtctcagagcagcagc    |
| FOXG1_1900 | ccgtctgtaaaacttgcaaaCTTCAGCTTCCCGATATCCGACGGTAGTGTtatcatttcaaatg       |
| UBE3A_1917 | agagattgttgaagccatcaCTTCAGCTTCCCGATATCCGACGGTAGTGTtctaagtatttccatg     |
| UBE3A_1916 | cacattaaagcaagatgagaCTTCAGCTTCCCGATATCCGACGGTAGTGTtttctctctttttttg     |
| UBE3A_1918 | agagcttttctgttcatctgtCTTCAGCTTCCCGATATCCGACGGTAGTGTcggtaggtatacagtcac  |
| UBE3A_1919 | gcagtttacaacgggcacagCTTCAGCTTCCCGATATCCGACGGTAGTGTatgcaaatataagcttatg  |
| UBE3A_1920 | gcttggaaatctagattctgcaCTTCAGCTTCCCGATATCCGACGGTAGTGTgataaaggctgaaagcaa |
| UBE3A_1921 | gaagaaactcagaatagcaggtCTTCAGCTTCCCGATATCCGACGGTAGTGTgacccggtaagaagaagc |
| UBE3A_1922 | gccttgaactgttttctactCTTCAGCTTCCCGATATCCGACGGTAGTGTcagatagactttttgc     |
| UBE3A_1923 | gaggttttcatatggtagcaaaCTTCAGCTTCCCGATATCCGACGGTAGTGTactgtgtttgtttgca   |
| UBE3A_1924 | gatctgtctgatatctggaaCTTCAGCTTCCCGATATCCGACGGTAGTGTacatgcttggaaagtgtt   |
| UBE3A_1925 | ggtaaccaatgatgtatgactCTTCAGCTTCCCGATATCCGACGGTAGTGTtggtagctcaaatctac   |
| UBE3A_1926 | gaccagctactgccaatcaCTTCAGCTTCCCGATATCCGACGGTAGTGTtataaaaaatgacaaagaa   |
| UBE3A_1927 | gtacatttccatggtgtctCTTCAGCTTCCCGATATCCGACGGTAGTGTgagtagttcacatacga     |
| UBE3A_1928 | catataaaacatttaaaataCTTCAGCTTCCCGATATCCGACGGTAGTGTattaacaaaacaattttg   |
| UBE3A_1929 | ccttcaaattccacatacaactCTTCAGCTTCCCGATATCCGACGGTAGTGTctaactcaaaagatgata |
| UBE3A_1930 | aggagttgatgaggaggctCTTCAGCTTCCCGATATCCGACGGTAGTGTttgttttttctgatact     |
| UBE3A_1931 | cactgtacatgcaattctattCTTCAGCTTCCCGATATCCGACGGTAGTGTttaaactagcagcccaa   |
| UBE3A_1932 | acgaagaatcactgttctctacaCTTCAGCTTCCCGATATCCGACGGTAGTGTaaagattatactttt   |
| UBE3A_1933 | gtttccaggggtccactcgaCTTCAGCTTCCCGATATCCGACGGTAGTGTgttctctgtttctacttt   |
| UBE3A_1934 | gaacttggtgttaaaacctggCTTCAGCTTCCCGATATCCGACGGTAGTGTgtaggacacaaatcacia  |
| UBE3A_1935 | actagattcgactgttaattcaCTTCAGCTTCCCGATATCCGACGGTAGTGTtggactcaggagtggg   |
| UBE3A_1936 | aatgatgatgaccattgttgcCTTCAGCTTCCCGATATCCGACGGTAGTGTgccaaggaactgat      |
| UBE3A_1937 | gatattcaggactgtggagattCTTCAGCTTCCCGATATCCGACGGTAGTGTgctgaaatgtctccatc  |
| UBE3A_1938 | ggctttgccatttttgcacCTTCAGCTTCCCGATATCCGACGGTAGTGTgtatattgtcacctaacg    |
| UBE3A_1939 | cagggcctaattttgcaaatCTTCAGCTTCCCGATATCCGACGGTAGTGTtacgtcaagtacattcc    |
| UBE3A_1940 | gtgtctgtgattatgctcCTTCAGCTTCCCGATATCCGACGGTAGTGTaagatgaagatgaaaagga    |
| UBE3A_1941 | agcactagaaaaactcttccaCTTCAGCTTCCCGATATCCGACGGTAGTGTtccatagcagcagaac    |
| UBE3A_1942 | ggtacagagctccgaaagCTTCAGCTTCCCGATATCCGACGGTAGTGTctctgattttctagatgta    |
| UBE3A_1943 | cattctaggctcaatatcatthaCTTCAGCTTCCCGATATCCGACGGTAGTGTgaatttcatatacttc  |
| UBE3A_1944 | cctttctggaggatgaggCTTCAGCTTCCCGATATCCGACGGTAGTGTgcaacaattctcaattgaaa   |
| UBE3A_1945 | gcaagctcagcttactctgagCTTCAGCTTCCCGATATCCGACGGTAGTGTcctgacgaatgagtttg   |
| UBE3A_1946 | gcttctgtaccaaacatcaCTTCAGCTTCCCGATATCCGACGGTAGTGTgactgctgattattatcc    |
| UBE3A_1947 | agcagctgcaagcatctaaCTTCAGCTTCCCGATATCCGACGGTAGTGTcttctcatcttatacacag   |
| UBE3A_1949 | gccctagactgttaattacCTTCAGCTTCCCGATATCCGACGGTAGTGTgaaatggaatattttg      |
| UBE3A_1948 | gtagcaaaatattccatatCTTCAGCTTCCCGATATCCGACGGTAGTGTgacgtaattaaagcagctt   |
| UBE3A_1951 | ccaccattgaaattgtagctcCTTCAGCTTCCCGATATCCGACGGTAGTGTaaacatttctcagaag    |
| UBE3A_1950 | acttctagagaaattgttagttaCTTCAGCTTCCCGATATCCGACGGTAGTGTgacaaattcaaatggtg |

|             |                                                                        |
|-------------|------------------------------------------------------------------------|
| UBE3A_1953  | cagcctttaaaggctgtcattCTTCAGCTTCCCGATATCCGACGGTAGTGTgcctacgctcagatcaag  |
| UBE3A_1952  | gctaccttgatctgagcgtactTCAGCTTCCCGATATCCGACGGTAGTGTtacaatgacagcctttaa   |
| APBA2_1954  | gtcctgtccctcacagccaggCTTCAGCTTCCCGATATCCGACGGTAGTGTctctgtcctccaatgtt   |
| APBA2_1955  | caccctatggtccaacatgcCTTCAGCTTCCCGATATCCGACGGTAGTGTctctgttctctggcgcg    |
| APBA2_1956  | cctctgaggaggagactatgaCTTCAGCTTCCCGATATCCGACGGTAGTGTcccttggaggcctatgtg  |
| APBA2_1957  | gtagtgcagctggagctccatcCTTCAGCTTCCCGATATCCGACGGTAGTGTtcccgttgcagtcca    |
| APBA2_1958  | ggagtggagcactcggcggCTTCAGCTTCCCGATATCCGACGGTAGTGTgggcatcacactacatcc    |
| APBA2_1959  | ccaccgctctggcactcatcCTTCAGCTTCCCGATATCCGACGGTAGTGTtcttctggctatgggcc    |
| APBA2_1960  | cgaggaggccaacgggaacaccCTTCAGCTTCCCGATATCCGACGGTAGTGTaaggcagccaggactacc |
| APBA2_1961  | ggtagtagtctggtagccctctCTTCAGCTTCCCGATATCCGACGGTAGTGTggctcatgctcagactc  |
| APBA2_1962  | catcaaggccagctgcagcccCTTCAGCTTCCCGATATCCGACGGTAGTGTgaggacattgaccagatcg |
| APBA2_1963  | caggcctctacagagtctcagCTTCAGCTTCCCGATATCCGACGGTAGTGTtcttggggtctctgtctt  |
| APBA2_1964  | agggacctcagggtacagccttCTTCAGCTTCCCGATATCCGACGGTAGTGTaagcaccggagagacc   |
| APBA2_1966  | aacggggaagttaaagatcgtgCTTCAGCTTCCCGATATCCGACGGTAGTGTgatgagtgtccagccca  |
| APBA2_1965  | gttctgggctggaacactcatcCTTCAGCTTCCCGATATCCGACGGTAGTGTcagcatcttaactccc   |
| APBA2_1968  | gtagtagcccaacaggtgaCTTCAGCTTCCCGATATCCGACGGTAGTGTtttgatgaaaatgcaactg   |
| APBA2_1967  | gcagttgcatctatcaaaatCTTCAGCTTCCCGATATCCGACGGTAGTGTaccttggggctactca     |
| APBA2_1969  | ctgctatcagaacggaaccctcCTTCAGCTTCCCGATATCCGACGGTAGTGTtcttggcaggcactt    |
| APBA2_1970  | ggtaggacccaggtaatggcaCTTCAGCTTCCCGATATCCGACGGTAGTGTctagtcccccaagtg     |
| APBA2_1972  | gagaaggaaggtgctgaggttCTTCAGCTTCCCGATATCCGACGGTAGTGTccagggaaacacaagca   |
| APBA2_1971  | gttttccgtggcttctcctCTTCAGCTTCCCGATATCCGACGGTAGTGTcacctctctctctctgtg    |
| APBA2_1973  | gcgttaagacagttgtcaaCTTCAGCTTCCCGATATCCGACGGTAGTGTtgggttttggacttaac     |
| APBA2_1974  | atcctctgggtggaatgaagaCTTCAGCTTCCCGATATCCGACGGTAGTGTgagcagagagagaagct   |
| APBA2_1975  | gtcagcctctcaggactgcacCTTCAGCTTCCCGATATCCGACGGTAGTGTtagtgttccctgacgtgg  |
| APBA2_1976  | ggccatcagcactacaatgttCTTCAGCTTCCCGATATCCGACGGTAGTGTctggcaaggcttactta   |
| APBA2_1977  | gctgttactgatgtttccagtggCTTCAGCTTCCCGATATCCGACGGTAGTGTctgcatgtgttcgagt  |
| APBA2_1978  | gcgacatcatcaaccaggagaCTTCAGCTTCCCGATATCCGACGGTAGTGTtagctggcctccctct    |
| APBA2_1979  | cttctggctcaagtctcggggCTTCAGCTTCCCGATATCCGACGGTAGTGTgcagaagctggcaaatg   |
| APBA2_1980  | gctccatctgcccaggtgactCTTCAGCTTCCCGATATCCGACGGTAGTGTccttgggctcttggcag   |
| APBA2_1981  | gatctccctctgtgcttctCTTCAGCTTCCCGATATCCGACGGTAGTGTttgatggacatgatggt     |
| APBA2_1982  | cctgcctcactcatccccactCTTCAGCTTCCCGATATCCGACGGTAGTGTggaagctgagatcggg    |
| APBA2_1983  | gtgcagaatggaattgtgagttccCTTCAGCTTCCCGATATCCGACGGTAGTGTactcctgtccccgtgc |
| APBA2_1984  | gaagcccagctggtactgaggtcCTTCAGCTTCCCGATATCCGACGGTAGTGTccaggtctaccaggc   |
| APBA2_1985  | gatagccaagctctgtccaactCTTCAGCTTCCCGATATCCGACGGTAGTGTgacctggcatgtctg    |
| APBA2_1986  | gctctgcccgtgatctcgatgaCTTCAGCTTCCCGATATCCGACGGTAGTGTggaggctatggagggc   |
| APBA2_1987  | acatctaggccacccagcctCTTCAGCTTCCCGATATCCGACGGTAGTGTgctttcacctgattgtgg   |
| APBA2_1988  | cagcgggctcctgaccctgaCTTCAGCTTCCCGATATCCGACGGTAGTGTggagccagcctcctgtg    |
| CHRNA7_1989 | cccgggacatcccggcgCTTCAGCTTCCCGATATCCGACGGTAGTGTggagcgcctcctcctgctc     |
| CHRNA7_1990 | ccacggaggagtggaggcggggaCTTCAGCTTCCCGATATCCGACGGTAGTGTgccccaccggtgcag   |
| CHRNA7_1991 | gtctacttccctgagcctcctCTTCAGCTTCCCGATATCCGACGGTAGTGTcccttcccgggtctt     |
| CHRNA7_1992 | gagtggtgagcattggccacCTTCAGCTTCCCGATATCCGACGGTAGTGTcaccgctggcggccc      |
| CHRNA7_1994 | ggttacaagaagaagaatgagacCTTCAGCTTCCCGATATCCGACGGTAGTGTaagatcttgagccca   |
| CHRNA7_1993 | gctgcaagatcttgacccaCTTCAGCTTCCCGATATCCGACGGTAGTGTtcttcttttgaaccata     |
| CHRNA7_1995 | acatttctctataacagtaagCTTCAGCTTCCCGATATCCGACGGTAGTGTggaagtgaagtctgc     |
| CHRNA7_1996 | aatctggccatctgggaaacCTTCAGCTTCCCGATATCCGACGGTAGTGTcatagataacatccagca   |
| CHRNA7_1998 | aacaggaaaaggactgcatgaCTTCAGCTTCCCGATATCCGACGGTAGTGTgcttctcatttctaactg  |
| CHRNA7_1997 | cagttagaaaactgaagcgagttCTTCAGCTTCCCGATATCCGACGGTAGTGTgagctctttctgctt   |
| CHRNA7_1999 | atctgcagatgcaggaggcagCTTCAGCTTCCCGATATCCGACGGTAGTGTgtcttctgtttccatcacc |
| CHRNA7_2000 | caaggaccagcctcctaagaCTTCAGCTTCCCGATATCCGACGGTAGTGTcccaaacctttaaagcttg  |
| CHRNA7_2001 | ccttcacagtaccatgctcCTTCAGCTTCCCGATATCCGACGGTAGTGTcacattgaaataaacagggt  |
| CHRNA7_2002 | ggctcttgcagcactatagaaCTTCAGCTTCCCGATATCCGACGGTAGTGTccggaatctgcaggag    |
| CHRNA7_2003 | actggagacctctgctgagatCTTCAGCTTCCCGATATCCGACGGTAGTGTctatggcctcaactgct   |
| CHRNA7_2004 | cggtagcattgataggttaaggCTTCAGCTTCCCGATATCCGACGGTAGTGTagaattgagccttctgt  |
| CHRNA7_2005 | ccacgagcagcatgaagacCTTCAGCTTCCCGATATCCGACGGTAGTGTattcttctagttcatctg    |
| CHRNA7_2006 | caagtggtacgttctcccacCTTCAGCTTCCCGATATCCGACGGTAGTGTtccacctgcatctgttc    |
| CHRNA7_2007 | gtcggggtctggtggtggtCTTCAGCTTCCCGATATCCGACGGTAGTGTaagcatttctttagaat     |
| CHRNA7_2009 | gcctctcattgcaggaaccacCTTCAGCTTCCCGATATCCGACGGTAGTGTcgcggaagccagatgac   |
| CHRNA7_2008 | cctgccaagtggagatgagCTTCAGCTTCCCGATATCCGACGGTAGTGTctcttaactgtctgttgt    |
| CHRNA7_2010 | gatgagcacctcctgcaggCTTCAGCTTCCCGATATCCGACGGTAGTGTgcccgtggcgccgcccgc    |
| CHRNA7_2011 | gctgggggagcaggccatgctCTTCAGCTTCCCGATATCCGACGGTAGTGTtctgctgacagccctcg   |
| CHRNA7_2012 | atctgaccatcgcatcctgatCTTCAGCTTCCCGATATCCGACGGTAGTGTtaggagctccgctacat   |
| CHRNA7_2013 | gcacagcggtcaccacacCTTCAGCTTCCCGATATCCGACGGTAGTGTtctgtgattttccatgt      |
| CHD2_2015   | gtgttcttgaagctctgCTTCAGCTTCCCGATATCCGACGGTAGTGTtagacaaaaggagaaggt      |
| CHD2_2014   | gggagaacctcagcttacaCTTCAGCTTCCCGATATCCGACGGTAGTGTtcccccttaataatgaaga   |
| CHD2_2016   | gcagctgcaatctctgagCTTCAGCTTCCCGATATCCGACGGTAGTGTatttttaactctctctct     |

|           |                                                                        |
|-----------|------------------------------------------------------------------------|
| CHD2_2017 | gttcgactcgtgcatgtcCTTCAGCTTCCCGATATCCGACGGTAGTGTctttccacatcagtatcc     |
| CHD2_2018 | gttgtcatgaaaactcattagtaCTTCAGCTTCCCGATATCCGACGGTAGTGTgccagctcccagaa    |
| CHD2_2020 | attaagagaccaccgattaatcCTTCAGCTTCCCGATATCCGACGGTAGTGTttaaagatgatccctt   |
| CHD2_2019 | gggcatgcatttaactccctaCTTCAGCTTCCCGATATCCGACGGTAGTGTgctgtgctcttaattt    |
| CHD2_2022 | gtgtgtgaggggggaaaaatCTTCAGCTTCCCGATATCCGACGGTAGTGTgctcagaagtctgacaaa   |
| CHD2_2021 | acttgtagcatttctaggactCTTCAGCTTCCCGATATCCGACGGTAGTGTattttccccctcacac    |
| CHD2_2023 | gggtgactgttgccttaagatCTTCAGCTTCCCGATATCCGACGGTAGTGTactttgtttgctttgat   |
| CHD2_2024 | ggggacaggtctctggcttCTTCAGCTTCCCGATATCCGACGGTAGTGTatctaaaacgcagaatca    |
| CHD2_2025 | aaggcagactcgtcgaagagCTTCAGCTTCCCGATATCCGACGGTAGTGTgactttgtttctctctc    |
| CHD2_2026 | gggagcttcgtcatcatcaCTTCAGCTTCCCGATATCCGACGGTAGTGTtaaagtgcaaacccgg      |
| CHD2_2027 | gagttgatgaacagcaagataatCTTCAGCTTCCCGATATCCGACGGTAGTGTggttatgtgtgagctt  |
| CHD2_2028 | gagtcagctcaaaagtcacatCTTCAGCTTCCCGATATCCGACGGTAGTGTaatgtaattgtctccca   |
| CHD2_2029 | caagtgaagggttgcttCTTCAGCTTCCCGATATCCGACGGTAGTGTctctcttcaagtgactta      |
| CHD2_2030 | gaggactgatttcaccttcaCTTCAGCTTCCCGATATCCGACGGTAGTGTaccattgttgatttct     |
| CHD2_2031 | ggagatcacagctatctagaatCTTCAGCTTCCCGATATCCGACGGTAGTGTgaaggccttaaaaaac   |
| CHD2_2033 | ggcagacagacagaaaagtaCTTCAGCTTCCCGATATCCGACGGTAGTGTgaagtgaattaccatgta   |
| CHD2_2032 | acatgtaactcactcagccaCTTCAGCTTCCCGATATCCGACGGTAGTGTtttctgtctgtctgcca    |
| CHD2_2035 | aataaaaaaagacagaaaagtCTTCAGCTTCCCGATATCCGACGGTAGTGTgcaaaaaaataatct     |
| CHD2_2034 | attattttgtttccacatgCTTCAGCTTCCCGATATCCGACGGTAGTGTctgtcttattttatttg     |
| CHD2_2036 | aagccctcattggaaaagaaatCTTCAGCTTCCCGATATCCGACGGTAGTGTtgacagtgtaactctat  |
| CHD2_2037 | atctcccagctacactctgaCTTCAGCTTCCCGATATCCGACGGTAGTGTatcttctccctgaaaaaa   |
| CHD2_2038 | gctagctcattctggtgcaaCTTCAGCTTCCCGATATCCGACGGTAGTGTtctcagactggcctttg    |
| CHD2_2039 | acctctagctgataatctcgtCTTCAGCTTCCCGATATCCGACGGTAGTGTgatacaataagggtgtaa  |
| CHD2_2040 | caccagctgtatggccccttCTTCAGCTTCCCGATATCCGACGGTAGTGTggtgaactaatgattttt   |
| CHD2_2041 | ggtggaacaggtaggagaggCTTCAGCTTCCCGATATCCGACGGTAGTGTtatttctgctcatcaggtca |
| CHD2_2042 | gatcatcagtaaaattgtggttCTTCAGCTTCCCGATATCCGACGGTAGTGTgcaccagagattaact   |
| CHD2_2044 | gcgtgaactcaatctttgCTTCAGCTTCCCGATATCCGACGGTAGTGTatttcaaatgctccac       |
| CHD2_2043 | gtaataatctaaaaggctaaCTTCAGCTTCCCGATATCCGACGGTAGTGTagaattatgtcttaat     |
| CHD2_2046 | gagtcactcttcaaccagatCTTCAGCTTCCCGATATCCGACGGTAGTGTggagcttcttctccgg     |
| CHD2_2045 | ccataggctcctgattacgggCTTCAGCTTCCCGATATCCGACGGTAGTGTcgtctgtttttttac     |
| CHD2_2047 | gggaaagcaaaagctcaaatCTTCAGCTTCCCGATATCCGACGGTAGTGTctctgtcactttattat    |
| CHD2_2048 | cggagagcaaaaaagatgtCTTCAGCTTCCCGATATCCGACGGTAGTGTaatgtggctaaataact     |
| CHD2_2049 | agaaggaaaagcttagcactCTTCAGCTTCCCGATATCCGACGGTAGTGTaacccctcaggcctaac    |
| CHD2_2050 | aaatgttgcaaccactgctaCTTCAGCTTCCCGATATCCGACGGTAGTGTgtttttttgtatctagtag  |
| CHD2_2051 | cagatgtgctccttcttCTTCAGCTTCCCGATATCCGACGGTAGTGTgagaaaagtaattatgaggaa   |
| CHD2_2052 | acttcgaaaaaggggaaatCTTCAGCTTCCCGATATCCGACGGTAGTGTaaatatgatttttagagat   |
| CHD2_2053 | atcaactcccactgctccttCTTCAGCTTCCCGATATCCGACGGTAGTGTacttacctggaaggata    |
| CHD2_2054 | gctttgctgttaaagtaggaaCTTCAGCTTCCCGATATCCGACGGTAGTGTggatctcctgctgaata   |
| CHD2_2056 | aaataaaccaagaaaaactgtaaCTTCAGCTTCCCGATATCCGACGGTAGTGTctgtatgcagagccca  |
| CHD2_2055 | gggctctgcatcaaggggaaCTTCAGCTTCCCGATATCCGACGGTAGTGTttttctgtgtttttt      |
| CHD2_2057 | gaatgacttgaggcacaagCTTCAGCTTCCCGATATCCGACGGTAGTGTcactgcataaagtagtatat  |
| CHD2_2058 | gggggtccagtcagagcaaaCTTCAGCTTCCCGATATCCGACGGTAGTGTtaacatcctgaaagggc    |
| CHD2_2060 | ccgtctatgatctcctctcCTTCAGCTTCCCGATATCCGACGGTAGTGTttgattctgctcactc      |
| CHD2_2059 | cagcgcagtgacaccactggCTTCAGCTTCCCGATATCCGACGGTAGTGTggttcaggcataagcata   |
| CHD2_2062 | gaagtaaatgtagtttagaaCTTCAGCTTCCCGATATCCGACGGTAGTGTaatttccctctctcat     |
| CHD2_2061 | caatgaggagagggaatttCTTCAGCTTCCCGATATCCGACGGTAGTGTtcaaaactacatttact     |
| CHD2_2064 | gaacaaaagcacaacgaataCTTCAGCTTCCCGATATCCGACGGTAGTGTctgagaactctcccaca    |
| CHD2_2063 | gtgggagagagttctcagcatCTTCAGCTTCCCGATATCCGACGGTAGTGTctgtgtggctttgtct    |
| CHD2_2065 | agagcggcagaaggagctagCTTCAGCTTCCCGATATCCGACGGTAGTGTcagacaatgggtgtctgt   |
| CHD2_2066 | cctttgtccttggaaatgatCTTCAGCTTCCCGATATCCGACGGTAGTGTgattcacaacataagaaa   |
| CHD2_2067 | agaagccaaagcgcagagggCTTCAGCTTCCCGATATCCGACGGTAGTGTttgtacagtgtgactttgc  |
| CHD2_2068 | cagagtcttcttctcactctcCTTCAGCTTCCCGATATCCGACGGTAGTGTgactttcaaaccaagctc  |
| CHD2_2070 | gttgatctagcatatcctgtCTTCAGCTTCCCGATATCCGACGGTAGTGTaagaggaagaaaggact    |
| CHD2_2069 | gtcccttatcttctcttttCTTCAGCTTCCCGATATCCGACGGTAGTGTgatgtgtagcatcaaca     |
| CHD2_2071 | caatgcaggaatatgaagagcaCTTCAGCTTCCCGATATCCGACGGTAGTGTggtcctaaagtgtcccca |
| CHD2_2072 | caatgcaggaatacgaagagcaCTTCAGCTTCCCGATATCCGACGGTAGTGTggtcctaaagtgtcccca |
| CHD2_2073 | gatcagttcaccaggcctCTTCAGCTTCCCGATATCCGACGGTAGTGTcttttagcaacagaaatccag  |
| CHD2_2074 | ccaacatgaagaggagttgaCTTCAGCTTCCCGATATCCGACGGTAGTGTttttctgtggaactctgc   |
| CHD2_2075 | caattaacctgaactcggCTTCAGCTTCCCGATATCCGACGGTAGTGTcaaatctatttctcaggt     |
| CHD2_2076 | ggctatggaaactggagattCTTCAGCTTCCCGATATCCGACGGTAGTGTcctcttctaatgtctctcg  |
| CHD2_2077 | cgagaatcatcttccccctCTTCAGCTTCCCGATATCCGACGGTAGTGTattacacaacaaatcttct   |
| CHD2_2078 | gacaggtgggaagaggtgaCTTCAGCTTCCCGATATCCGACGGTAGTGTgcttctcttcttctgt      |
| CHD2_2079 | cagccccttcttctccagacCTTCAGCTTCCCGATATCCGACGGTAGTGTcatgagaaggtgacattct  |
| CHD2_2080 | catcagaagaggagaagtgaCTTCAGCTTCCCGATATCCGACGGTAGTGTatcatcatttctctctt    |
| CHD2_2081 | gtcaattcatgctctctCTTCAGCTTCCCGATATCCGACGGTAGTGTttcagatgattttattcca     |

|             |                                                                         |
|-------------|-------------------------------------------------------------------------|
| CHD2_2083   | gttctcctgttctcttctcttCCTCAGCTTCCCGATATCCGACGGTAGTGTggcgaattgcaaggct     |
| CHD2_2082   | aaggggacaaggaagaagaCCTCAGCTTCCCGATATCCGACGGTAGTGTtagcaaaattcatagccc     |
| CHD2_2084   | atgatctggaccaggagacatCCTCAGCTTCCCGATATCCGACGGTAGTGTactccttgaactctttt    |
| CHD2_2085   | atcctcatctctcaatgggCCTCAGCTTCCCGATATCCGACGGTAGTGTattgcttagctcaactgaa    |
| CHD2_2086   | acgtgcaagaacagctggaaCCTCAGCTTCCCGATATCCGACGGTAGTGTaagcaaaagacaagactta   |
| CHD2_2087   | agccccctgtcaggtttgtcgCCTCAGCTTCCCGATATCCGACGGTAGTGTgaggcgaagtggttacct   |
| CHD2_2088   | gcacaactcatctattggcaataCCTCAGCTTCCCGATATCCGACGGTAGTGTgacatcaaaactctgga  |
| CHD2_2089   | cataagttatacaagatggctcaCCTCAGCTTCCCGATATCCGACGGTAGTGTcttggccatcatgaaga  |
| CHD2_2090   | gttttcgagcatcaaattctgCCTCAGCTTCCCGATATCCGACGGTAGTGTccatggaaaaacaaaatt   |
| CHD2_2091   | ccttcaccctcagaagcctcaCCTCAGCTTCCCGATATCCGACGGTAGTGTcttggttccttttact     |
| CHD2_2092   | gtgtgaggtatgggactgagaCCTCAGCTTCCCGATATCCGACGGTAGTGTaaaactccacttaatgacc  |
| CHD2_2093   | ggctagactctgtgctttatCCTCAGCTTCCCGATATCCGACGGTAGTGTaccgaagagataactaciaa  |
| CHD2_2094   | gaccaccattatggggaccgCCTCAGCTTCCCGATATCCGACGGTAGTGTcagatcattcttcttttcc   |
| CHD2_2095   | gtaccagtgtctcactactgatCCTCAGCTTCCCGATATCCGACGGTAGTGTtctgtgtcccgggtgt    |
| CHD2_2096   | gtttctaggagaaagtgcgCCTCAGCTTCCCGATATCCGACGGTAGTGTccaacaacatgtccagaa     |
| CHD2_2098   | cggaaatcctgtggtggaattCCTCAGCTTCCCGATATCCGACGGTAGTGTgagactgcaggggtcaa    |
| CHD2_2097   | catggccaggaccctcagacCCTCAGCTTCCCGATATCCGACGGTAGTGTactaatcctgtcactctca   |
| CHD2_2100   | atccaggggtgactggaatCCTCAGCTTCCCGATATCCGACGGTAGTGTtagaccaaaaatcacctgtg   |
| CHD2_2099   | aaacaaccagattataactggaatCCTCAGCTTCCCGATATCCGACGGTAGTGTaaacagcctctacccc  |
| PNPO_2132   | agtcaactgtgtggtcgagCCTCAGCTTCCCGATATCCGACGGTAGTGTtggttcgaactcaaaagg     |
| PNPO_2133   | aggtagcctggcactcggcaggCCTCAGCTTCCCGATATCCGACGGTAGTGTctccggggaccctttt    |
| PNPO_2134   | cctgacataggggaagccaaCCTCAGCTTCCCGATATCCGACGGTAGTGTtccatagtagcactatata   |
| PNPO_2135   | cactgaacagcctctcaaacCCTCAGCTTCCCGATATCCGACGGTAGTGTaattggcatccagagtag    |
| PNPO_2137   | agcaaaagagcagagcactgtCCTCAGCTTCCCGATATCCGACGGTAGTGTgaaagattactagctctttt |
| PNPO_2136   | aaaagagctagtaattcttccaCCTCAGCTTCCCGATATCCGACGGTAGTGTgtctgtcttttct       |
| PNPO_2139   | agtaaaagagaatccacagccaCCTCAGCTTCCCGATATCCGACGGTAGTGTctagacgtagccataaac  |
| PNPO_2138   | gtttatggctacgtctagcgtCCTCAGCTTCCCGATATCCGACGGTAGTGTgtctgtgattctcttttact |
| PNPO_2140   | agccaccagagttctgtatCCTCAGCTTCCCGATATCCGACGGTAGTGTatttaagcattcacccag     |
| PNPO_2141   | gggagtggaagtagcactcagCCTCAGCTTCCCGATATCCGACGGTAGTGTggacagctctggggata    |
| PNPO_2143   | cagggggaagagtagaagaaggCCTCAGCTTCCCGATATCCGACGGTAGTGTgtaaacacaggggctg    |
| PNPO_2142   | caggccctgtgttactttaaCCTCAGCTTCCCGATATCCGACGGTAGTGTttctaactcttccccctg    |
| PNPO_2144   | gcctaccacaggagattccccCCTCAGCTTCCCGATATCCGACGGTAGTGTtagaaaactccacagagc   |
| PNPO_2145   | ggttggttgacctgccagaacCCTCAGCTTCCCGATATCCGACGGTAGTGTccagcaggtcccagagt    |
| PNPO_2146   | cccttatcttcagactcttcaCCTCAGCTTCCCGATATCCGACGGTAGTGTtctatgagagactgtcac   |
| ZNF532_2238 | ccatgaaagccacatgaagcagCCTCAGCTTCCCGATATCCGACGGTAGTGTaaacagaacatctgtctca |
| ZNF532_2239 | gtccagactcaatagctgttttagCCTCAGCTTCCCGATATCCGACGGTAGTGTgccctcggaagagtca  |
| ZNF532_2240 | gagcaaaagtccttgaaggagCCTCAGCTTCCCGATATCCGACGGTAGTGTcgttatctgcaagaatggt  |
| ZNF532_2241 | gtaactgtcaagggaggatctgCCTCAGCTTCCCGATATCCGACGGTAGTGTctcaactcttctctgt    |
| ZNF532_2242 | aggcactcgaggggaaactCCTCAGCTTCCCGATATCCGACGGTAGTGTcagtgtagaagttttagt     |
| ZNF532_2243 | gcttatctgtatctgtctgCCTCAGCTTCCCGATATCCGACGGTAGTGTctttaaagggttcataaaca   |
| ZNF532_2244 | atgacaccagcctcccagcCCTCAGCTTCCCGATATCCGACGGTAGTGTcagaagcagttctataaac    |
| ZNF532_2245 | cggagctcagcttccatctcaCCTCAGCTTCCCGATATCCGACGGTAGTGTggttcttgcaggagtct    |
| ZNF532_2246 | atctcatcgacgggacaaaaaCCTCAGCTTCCCGATATCCGACGGTAGTGTctctcagcgtcaaaaag    |
| ZNF532_2247 | gcggctctcgactgtcatttacCCTCAGCTTCCCGATATCCGACGGTAGTGTgacctcgggagagga     |
| ZNF532_2248 | cagggtattgccaagaagtgaCCTCAGCTTCCCGATATCCGACGGTAGTGTcccagaagcatctcaagtg  |
| ZNF532_2249 | gttctctgatttcccagaagaCCTCAGCTTCCCGATATCCGACGGTAGTGTggagaggaaagacggc     |
| ZNF532_2250 | aagcctgtggctactgtcttCCTCAGCTTCCCGATATCCGACGGTAGTGTctgtgacatccttctgtc    |
| ZNF532_2251 | acctgttgggggtgagctctCCTCAGCTTCCCGATATCCGACGGTAGTGTggacagaggcagagatat    |
| ZNF532_2252 | caaaactgtccaagaactgtCCTCAGCTTCCCGATATCCGACGGTAGTGTaaacaaccacaggtgaaag   |
| ZNF532_2253 | atgccgcaccacagactgtCCTCAGCTTCCCGATATCCGACGGTAGTGTcctgctttattgttctga     |
| ZNF532_2254 | caacaaggtgctgagcagtgCCTCAGCTTCCCGATATCCGACGGTAGTGTccaagtgtcaacaaac      |
| ZNF532_2255 | aagcttccaccacagaactctgCCTCAGCTTCCCGATATCCGACGGTAGTGTagtcaaaaggatcccca   |
| ZNF532_2256 | atgacgctcttccatgCCTCAGCTTCCCGATATCCGACGGTAGTGTgggtacaaggtcttggagt       |
| ZNF532_2257 | gtaaaaaacagaggtcttttacCCTCAGCTTCCCGATATCCGACGGTAGTGTggaagtattgttgacg    |
| ZNF532_2258 | ccttcaagcactccatcacCCTCAGCTTCCCGATATCCGACGGTAGTGTgcagatcaaatgatagtttc   |
| ZNF532_2259 | gccgatatgactgtcccagtaCCTCAGCTTCCCGATATCCGACGGTAGTGTgaaatgtgtgaccagtga   |
| ZNF532_2260 | gtaggcatgagtgcttgataaCCTCAGCTTCCCGATATCCGACGGTAGTGTagtctaaaatggttggagt  |
| ZNF532_2261 | catctgcaggtcgtgcaactCCTCAGCTTCCCGATATCCGACGGTAGTGTgtttcccccttggttg      |
| ZNF532_2262 | acactcagggcaggttagggCCTCAGCTTCCCGATATCCGACGGTAGTGTcggttgtagtgaacagagt   |
| ZNF532_2263 | gtttaaagctgtcccacagcCCTCAGCTTCCCGATATCCGACGGTAGTGTgacctgtgtttatttt      |
| ZNF532_2264 | actgtagaagacttcacagtgCCTCAGCTTCCCGATATCCGACGGTAGTGTaaagcagtgaggataaac   |
| ZNF532_2265 | gtccagactgttcttttataCCTCAGCTTCCCGATATCCGACGGTAGTGTtctgctcactcttctat     |
| ZNF532_2266 | gaaaaacagacacttctggtCCTCAGCTTCCCGATATCCGACGGTAGTGTgctcagccttgattatga    |
| ZNF532_2267 | cctgcaactcaaaattcagcaCCTCAGCTTCCCGATATCCGACGGTAGTGTgtgcttcttttagtgtt    |
| ZNF532_2268 | gctcaaaaggcaagttatacccCCTCAGCTTCCCGATATCCGACGGTAGTGTggccacttcttggttt    |

|             |                                                                        |
|-------------|------------------------------------------------------------------------|
| ZNF532_2269 | gtcagtaaaagatgaaagctgcCTTCAGCTTCCCGATATCCGACGGTAGTGTtccatctctgtgaaaaa  |
| ZNF532_2270 | cccgtgctccttctcacgtCTTCAGCTTCCCGATATCCGACGGTAGTGTcaccaagtgttttaaggt    |
| ZNF532_2272 | cacaggctgtgggacgagctCTTCAGCTTCCCGATATCCGACGGTAGTGTagttaatgttactactaa   |
| ZNF532_2271 | cctgctcgtaaagtctgtttcCTTCAGCTTCCCGATATCCGACGGTAGTGTgtaacttctctcttc     |
| ZNF532_2273 | ccaccaatgaggaggaacagaaCTTCAGCTTCCCGATATCCGACGGTAGTGTtctctgctttcacc     |
| ZNF532_2274 | gtcatttcttcaggtcaggCTTCAGCTTCCCGATATCCGACGGTAGTGTcaacaaaaactgaaagga    |
| ZNF532_2275 | gttcacaagtgtccgtgtgtCTTCAGCTTCCCGATATCCGACGGTAGTGTgtcatttgccttcttc     |
| ZNF532_2276 | aaacattgatttccagcttttcaCTTCAGCTTCCCGATATCCGACGGTAGTGTcgtgtagcagaggcca  |
| ZNF532_2277 | ataaccaacaggagaacaaaccCTTCAGCTTCCCGATATCCGACGGTAGTGTggttctctaccagctgc  |
| ZNF532_2278 | ccccagccccatttgcctgCTTCAGCTTCCCGATATCCGACGGTAGTGTgtcccatgtgagttatt     |
| ZNF532_2279 | gtccacattggaataaaaaagacCTTCAGCTTCCCGATATCCGACGGTAGTGTgcgaaaaactttgaa   |
| PNKP_2333   | gttggggcctgaactcttcCTTCAGCTTCCCGATATCCGACGGTAGTGTacagcgtttatgtggagg    |
| PNKP_2334   | atcccgttccggctatgggtggCTTCAGCTTCCCGATATCCGACGGTAGTGTgttggggatagcaggggg |
| PNKP_2335   | actgtggggaaactcagagggCTTCAGCTTCCCGATATCCGACGGTAGTGTaacagttagggacagcct  |
| PNKP_2336   | ccttcatatccccgtgtcagacCTTCAGCTTCCCGATATCCGACGGTAGTGTccacaacaaccgggtga  |
| PNKP_2337   | gcacactggagctactctgtCTTCAGCTTCCCGATATCCGACGGTAGTGTaggggaggagggggctcagg |
| PNKP_2338   | cgagccgaggcctccctgCTTCAGCTTCCCGATATCCGACGGTAGTGTtcatcgacaacacaacca     |
| PNKP_2340   | gacccgagagcgcgagcCTTCAGCTTCCCGATATCCGACGGTAGTGTctctgggtctgagctctgt     |
| PNKP_2339   | gtctcacaggtgtcacacagcCTTCAGCTTCCCGATATCCGACGGTAGTGTagtctgtgtcagggcc    |
| PNKP_2342   | ccccaaatcttataaagttcccCTTCAGCTTCCCGATATCCGACGGTAGTGTccccgctgggtccta    |
| PNKP_2341   | gggtggcctaggaccaggcCTTCAGCTTCCCGATATCCGACGGTAGTGTtagtgggaacttataatag   |
| PNKP_2344   | gttctgtgcgctgccctgCTTCAGCTTCCCGATATCCGACGGTAGTGTacgctgtccccgcccctc     |
| PNKP_2343   | ggggcggggacacgcctgaCTTCAGCTTCCCGATATCCGACGGTAGTGTgggcacgcgacaggaacag   |
| PNKP_2345   | gttgagggcaaacatagggttagCTTCAGCTTCCCGATATCCGACGGTAGTGTcggggagcctcccat   |
| PNKP_2346   | cccttcgaccgctgaggaCTTCAGCTTCCCGATATCCGACGGTAGTGTgcggaagaagaactctt      |
| PNKP_2347   | gtctggaacacagggacaccCTTCAGCTTCCCGATATCCGACGGTAGTGTgacgaacatcagacacagg  |
| PNKP_2348   | cgcccggccaactggggcccCTTCAGCTTCCCGATATCCGACGGTAGTGTgcacgccatcatcctcg    |
| PNKP_2349   | ggccctccacaatgtccccCTTCAGCTTCCCGATATCCGACGGTAGTGTtcccaccagctcggagg     |
| PNKP_2352   | gccccggccccctcttcccCTTCAGCTTCCCGATATCCGACGGTAGTGTgcttggggagctaaag      |
| PNKP_2351   | cagcttagctcccccaagcaCTTCAGCTTCCCGATATCCGACGGTAGTGTgaaagggaggggcgg      |
| PNKP_2354   | gaggagttaagggcaaggtggagCTTCAGCTTCCCGATATCCGACGGTAGTGTgtgcacgtggcggtcc  |
| PNKP_2353   | agatcaccagctggggagcaagCTTCAGCTTCCCGATATCCGACGGTAGTGTacatagctcccagcctc  |
| PNKP_2355   | actccaggcctcactcactcctCTTCAGCTTCCCGATATCCGACGGTAGTGTcatgcagacagcgct    |
| PNKP_2357   | ctggcccgggtcaccCTTCAGCTTCCCGATATCCGACGGTAGTGTgacaccaggtggctgcttgat     |
| PNKP_2358   | ttactcctcctcagcCTTCAGCTTCCCGATATCCGACGGTAGTGTtggatgagcgtcccgtcc        |
| PNKP_2359   | gcccgggttactcgcataCTTCAGCTTCCCGATATCCGACGGTAGTGTgagcacgcaacaactgt      |
| PNKP_2360   | ggagaactggagaagtgtctagtCTTCAGCTTCCCGATATCCGACGGTAGTGTcgtgggaagagacc    |
| PNKP_2361   | cccgtagttaggggttaactcCTTCAGCTTCCCGATATCCGACGGTAGTGTtagtacttggctgggatt  |
| PNKP_2362   | gaggcctctctgggggtggcCTTCAGCTTCCCGATATCCGACGGTAGTGTgattttccgctggattt    |
| PNKP_2364   | gcaaggcctggggatgggattCTTCAGCTTCCCGATATCCGACGGTAGTGTgaaatcaggaccatca    |
| PNKP_2363   | attgggtccctcatttctggggaCTTCAGCTTCCCGATATCCGACGGTAGTGTatcccaggccttctgt  |
| PNKP_2365   | ccgagggcaggaagtggggCTTCAGCTTCCCGATATCCGACGGTAGTGTtctggattgtcccgtt      |
| PNKP_2366   | gcagggaccctgaccaggctCTTCAGCTTCCCGATATCCGACGGTAGTGTttactctctcccagg      |
| EPN1_2368   | ccaagaagccacagagggagaCTTCAGCTTCCCGATATCCGACGGTAGTGTccatgattcatagccacc  |
| EPN1_2367   | gtgaggtggctatgaatcatCTTCAGCTTCCCGATATCCGACGGTAGTGTaatcccctctgtggcttc   |
| EPN1_2370   | cagcacaagaggacattacccttCTTCAGCTTCCCGATATCCGACGGTAGTGTgcccaggaagaaccg   |
| EPN1_2369   | gtgggctgttagttcttctcCTTCAGCTTCCCGATATCCGACGGTAGTGTcattctgtgtgtga       |
| EPN1_2371   | cccctctgcttgttccagaggCTTCAGCTTCCCGATATCCGACGGTAGTGTgacgcttggctctctgg   |
| EPN1_2372   | cagcatcggggccctgtgCTTCAGCTTCCCGATATCCGACGGTAGTGTactcatctttgacctgagg    |
| EPN1_2373   | cggcaggtctggcaggtcaCTTCAGCTTCCCGATATCCGACGGTAGTGTctctgagtgttggacga     |
| EPN1_2374   | gttctccttctcggagatcatCTTCAGCTTCCCGATATCCGACGGTAGTGTaggccagatgaagaa     |
| EPN1_2375   | gtaggtgaggtcggcaatctctgCTTCAGCTTCCCGATATCCGACGGTAGTGTactgagcccctgacc   |
| EPN1_2376   | ggagaacatgtacgctgagcaCTTCAGCTTCCCGATATCCGACGGTAGTGTcgcagcagctctctgg    |
| EPN1_2377   | ccggtctgatgaggtactcctCTTCAGCTTCCCGATATCCGACGGTAGTGTaccagctgcttagctt    |
| EPN1_2378   | caaggaaaagctggcacagaccCTTCAGCTTCCCGATATCCGACGGTAGTGTaggacttccagtctgg   |
| EPN1_2379   | gagcgcgtgcccctcttCTTCAGCTTCCCGATATCCGACGGTAGTGTcctggctgggagagaaagca    |
| EPN1_2380   | gctggcctggccatgagcaCTTCAGCTTCCCGATATCCGACGGTAGTGTtctccctggctgggtctc    |
| EPN1_2381   | ggagctgcagctctctctcCTTCAGCTTCCCGATATCCGACGGTAGTGTagtggagccagggccacgc   |
| EPN1_2382   | catgaaggtcagagacccctCTTCAGCTTCCCGATATCCGACGGTAGTGTgctctgcctctgactct    |
| EPN1_2383   | cggctcaaaactaaggccagctCTTCAGCTTCCCGATATCCGACGGTAGTGTgagcctgtggcttcgg   |
| EPN1_2385   | gcacgaccagggagatgagaaCTTCAGCTTCCCGATATCCGACGGTAGTGTggccagggaggcagaa    |
| EPN1_2384   | gcttctctcctcctggccCTTCAGCTTCCCGATATCCGACGGTAGTGTtctcatgtctcctggt       |
| EPN1_2386   | ccccacctcggaccctggCTTCAGCTTCCCGATATCCGACGGTAGTGTctctctctctctctccc      |
| EPN1_2387   | gccgtgggacggcagcagcatCTTCAGCTTCCCGATATCCGACGGTAGTGTcaactgaggtctctgc    |
| EPN1_2389   | caggggtggggctcccccccCTTCAGCTTCCCGATATCCGACGGTAGTGTcagctgtcccgtccaag    |

|            |                                                                       |
|------------|-----------------------------------------------------------------------|
| EPN1_2388  | ggaagtccgatggtagtgcgtCTTCAGCTTCCCGATATCCGACGGTAGTGTggaggtccagccccac   |
| EPN1_2391  | ccggggccggtgtccaggaCTTCAGCTTCCCGATATCCGACGGTAGTGTcccttaggacactcaacac  |
| EPN1_2390  | acaggtactggaatgggggtggCTTCAGCTTCCCGATATCCGACGGTAGTGTcatgctctctgctca   |
| EPN1_2393  | atgttctgctcagcccctcctgCTTCAGCTTCCCGATATCCGACGGTAGTGTccactgggcagggagg  |
| EPN1_2392  | ctccccctgccagtgccagCTTCAGCTTCCCGATATCCGACGGTAGTGTgaggggctgagcagaacat  |
| EPN1_2394  | gacatgagtggggtcagggCTTCAGCTTCCCGATATCCGACGGTAGTGTatgatggctatactgctc   |
| EPN1_2395  | cagggcttcggggccacctCTTCAGCTTCCCGATATCCGACGGTAGTGTggctgattggccccagg    |
| EPN1_2396  | ggtgagtggtggccatcacctgCTTCAGCTTCCCGATATCCGACGGTAGTGTccccaccgggaagac   |
| EPN1_2397  | caggaaggggtggaggcctgCTTCAGCTTCCCGATATCCGACGGTAGTGTcgcagcccactgtgtc    |
| EPN1_2398  | gcgccaccacgtacatctCTTCAGCTTCCCGATATCCGACGGTAGTGTgtctctggttactcttc     |
| EPN1_2399  | actgagacggagctggtcagCTTCAGCTTCCCGATATCCGACGGTAGTGTgcctggattataggagga  |
| EPN1_2400  | cagtgccctccccctcctgCTTCAGCTTCCCGATATCCGACGGTAGTGTggccccaacactaatcc    |
| PLCB1_2401 | ccaaattcgtcaagtgggatgatCTTCAGCTTCCCGATATCCGACGGTAGTGTccccagctcctgccgc |
| PLCB1_2402 | gctgtcggacacgcacacgggctCTTCAGCTTCCCGATATCCGACGGTAGTGTattgataaacgcgcc  |
| PLCB1_2404 | aatgtaagaagaacatgaatCTTCAGCTTCCCGATATCCGACGGTAGTGTtagtagtaaacgactgaaa |
| PLCB1_2403 | cattttcagctgttactCTTCAGCTTCCCGATATCCGACGGTAGTGTattcatgtttctctac       |
| PLCB1_2406 | gtgaaatcgttaagcaacgacCTTCAGCTTCCCGATATCCGACGGTAGTGTcaatcaaggcagcatct  |
| PLCB1_2405 | cagatgtgcttattgttCTTCAGCTTCCCGATATCCGACGGTAGTGTcgttctaacgatttca       |
| PLCB1_2407 | cctcgtgaacatctccattCTTCAGCTTCCCGATATCCGACGGTAGTGTgttgaatctctagtatag   |
| PLCB1_2408 | gtgatcagcctgctccagCTTCAGCTTCCCGATATCCGACGGTAGTGTatgatagctcaaggattcag  |
| PLCB1_2409 | aagcgttaagcactctaatCTTCAGCTTCCCGATATCCGACGGTAGTGTgtctaagactgtgcagt    |
| PLCB1_2410 | ccagaaatgcatcctggacCTTCAGCTTCCCGATATCCGACGGTAGTGTcгааaggaaattgtgttt   |
| PLCB1_2412 | gagaagcagaaaaaagggtCTTCAGCTTCCCGATATCCGACGGTAGTGTtagacatggcatggatt    |
| PLCB1_2411 | atctgaatccatgcatgctCTTCAGCTTCCCGATATCCGACGGTAGTGTcaaaccttgttttctgc    |
| PLCB1_2414 | aagtgaacacaaaggagagCTTCAGCTTCCCGATATCCGACGGTAGTGTttggagggtgaac        |
| PLCB1_2413 | gttcagcccccaaaactCTTCAGCTTCCCGATATCCGACGGTAGTGTcctttgtgttctact        |
| PLCB1_2415 | gtaaggtacacatttaagccaCTTCAGCTTCCCGATATCCGACGGTAGTGTttgctgactcctgtgtt  |
| PLCB1_2416 | gatgttcaatttcagctgaCTTCAGCTTCCCGATATCCGACGGTAGTGTgtctttagacacagtg     |
| PLCB1_2417 | caagagcaagccaagattCTTCAGCTTCCCGATATCCGACGGTAGTGTttgtgttctctgattg      |
| PLCB1_2418 | agggtgataaagtattcattaagCTTCAGCTTCCCGATATCCGACGGTAGTGTgctgtgactcccc    |
| PLCB1_2419 | gcccccttctactattctCTTCAGCTTCCCGATATCCGACGGTAGTGTgattcacatcttctaa      |
| PLCB1_2420 | cattcaaatccagtttctcaggCTTCAGCTTCCCGATATCCGACGGTAGTGTcagaagtagagttgtt  |
| PLCB1_2421 | gaacctgtacaccatggCTTCAGCTTCCCGATATCCGACGGTAGTGTggttgtttttgtgtgtt      |
| PLCB1_2422 | gcagtcctccctccagcaCTTCAGCTTCCCGATATCCGACGGTAGTGTtaccttaggagccttaacc   |
| PLCB1_2423 | gcagtcctccctccagcaCTTCAGCTTCCCGATATCCGACGGTAGTGTtaccttaggagccttaacc   |
| PLCB1_2425 | atgagaacacatgtatattcagCTTCAGCTTCCCGATATCCGACGGTAGTGTcgggaaaagactcat   |
| PLCB1_2424 | ggaatgagcttttccgaCTTCAGCTTCCCGATATCCGACGGTAGTGTactgaatatacatgtgtct    |
| PLCB1_2427 | ggagaacaagaacagaagaaggCTTCAGCTTCCCGATATCCGACGGTAGTGTgcatcattcctcaag   |
| PLCB1_2426 | gtccttgaaggaaatgatgcaCTTCAGCTTCCCGATATCCGACGGTAGTGTccttctctgttcttct   |
| PLCB1_2428 | gctctcagaacaagcctcaCTTCAGCTTCCCGATATCCGACGGTAGTGTagaatgctttcatttct    |
| PLCB1_2429 | ccgcttctctgatgactCTTCAGCTTCCCGATATCCGACGGTAGTGTcaattctaaacacacaa      |
| PLCB1_2431 | acagatcatatgtaccattcaCTTCAGCTTCCCGATATCCGACGGTAGTGTagggtggggaatgcc    |
| PLCB1_2430 | cattccaccacctgactctCTTCAGCTTCCCGATATCCGACGGTAGTGTgtgacatgatgatctgta   |
| PLCB1_2432 | gccagtcaagtttgactcattCTTCAGCTTCCCGATATCCGACGGTAGTGTtctcgggaaaataactga |
| PLCB1_2433 | gattagacatttctgtggcCTTCAGCTTCCCGATATCCGACGGTAGTGTtcttgttccattact      |
| PLCB1_2435 | gggaaggtgagaatacaatCTTCAGCTTCCCGATATCCGACGGTAGTGTcgtcaaatcaagatactc   |
| PLCB1_2434 | actgcagaatgaacacagctCTTCAGCTTCCCGATATCCGACGGTAGTGTttttgtttgttcttca    |
| PLCB1_2436 | actatatgctcagctctctCTTCAGCTTCCCGATATCCGACGGTAGTGTggtagcttcttagtacta   |
| PLCB1_2437 | ggatgaatccacagctgttccCTTCAGCTTCCCGATATCCGACGGTAGTGTagaatggtttggacact  |
| PLCB1_2438 | catttactgaaggcatgtagCTTCAGCTTCCCGATATCCGACGGTAGTGTacaataaggcttgtgttt  |
| PLCB1_2439 | atcaaatgctgtcaggccCTTCAGCTTCCCGATATCCGACGGTAGTGTgactaagccattcttatg    |
| PLCB1_2441 | aaccaacatatctactccagctCTTCAGCTTCCCGATATCCGACGGTAGTGTataactcatatcaag   |
| PLCB1_2440 | aacatccaaggaatgctgCTTCAGCTTCCCGATATCCGACGGTAGTGTggattgattgattattga    |
| PLCB1_2443 | aaggacatgaagacacacctCTTCAGCTTCCCGATATCCGACGGTAGTGTaaggttctcagcacacta  |
| PLCB1_2442 | gtagtgctgagaaaccttCTTCAGCTTCCCGATATCCGACGGTAGTGTggtgtgcttctaatgtct    |
| PLCB1_2444 | aagactatgtgcagacacatCTTCAGCTTCCCGATATCCGACGGTAGTGTaactaacattggaaggaa  |
| PLCB1_2445 | gtagacaagacagcaggcagCTTCAGCTTCCCGATATCCGACGGTAGTGTggttcagtttcttctca   |
| PLCB1_2446 | aagaagaagtaagaagaaggctCTTCAGCTTCCCGATATCCGACGGTAGTGTtccaggacctttagct  |
| PLCB1_2447 | atcttcagtgtaagaagcagcCTTCAGCTTCCCGATATCCGACGGTAGTGTccaatgtgctattcctct |
| PLCB1_2448 | actacaacctgacaccaagCTTCAGCTTCCCGATATCCGACGGTAGTGTaggcaagaaagaataaaa   |
| PLCB1_2449 | gattccccatttctgctggaCTTCAGCTTCCCGATATCCGACGGTAGTGTcctcctgactggcact    |
| PLCB1_2451 | cctgtaaacaaacaatattgCTTCAGCTTCCCGATATCCGACGGTAGTGTgggaaagggtgactt     |
| PLCB1_2450 | ccttcccccatggaattaCTTCAGCTTCCCGATATCCGACGGTAGTGTttgtttacaggaagaataa   |
| PLCB1_2452 | cacaagaaaaccactgacctCTTCAGCTTCCCGATATCCGACGGTAGTGTtcccttagcttcatattc  |
| PLCB1_2453 | catttctttagtgtttcttctCTTCAGCTTCCCGATATCCGACGGTAGTGTtcttcttggcggact    |

|              |                                                                        |
|--------------|------------------------------------------------------------------------|
| PLCB1_2454   | ggacctgtaccatggcaagaaaaCTTCAGCTTCCCGATATCCGACGGTAGTGTggagagccctttggaa  |
| PLCB1_2455   | agcagcagctgcttaattcttCTTCAGCTTCCCGATATCCGACGGTAGTGTgagtaaacctctgtgtctt |
| PLCB1_2456   | ccttcaagtctattaacttttggCTTCAGCTTCCCGATATCCGACGGTAGTGTaggaggttccagttgca |
| PLCB1_2457   | ctcaaaagaatctgtgagaagtCTTCAGCTTCCCGATATCCGACGGTAGTGTtgtttgaggaggtggga  |
| PLCB1_2458   | attgttctgacactctctctgCTTCAGCTTCCCGATATCCGACGGTAGTGTacaatggaagttaaagaga |
| PLCB1_2459   | ccctctccaaacagttcatCTTCAGCTTCCCGATATCCGACGGTAGTGTctctttactctcattgtga   |
| PLCB1_2462   | catccagaattgacaaatggCTTCAGCTTCCCGATATCCGACGGTAGTGTatgttttcaaaggagagag  |
| PLCB1_2461   | cgctctctctttgcaaaacatCTTCAGCTTCCCGATATCCGACGGTAGTGTcacttttaaatgtttagat |
| PLCB1_2463   | cccaaggtaaacggaactgaCTTCAGCTTCCCGATATCCGACGGTAGTGTgcacttttaaatgtttagat |
| PLCB1_2464   | ccttgtgttctctacagttCTTCAGCTTCCCGATATCCGACGGTAGTGTctgtgtacaaggtacttat   |
| PLCB1_2466   | ggaaaaaaaggagggtctcattCTTCAGCTTCCCGATATCCGACGGTAGTGTctactctgccggaagg   |
| PLCB1_2465   | gtccttccggccaggtaggaCTTCAGCTTCCCGATATCCGACGGTAGTGTatgacagctccctttttt   |
| PLCB1_2467   | acagcaatcacggttctgccCTTCAGCTTCCCGATATCCGACGGTAGTGTaagcatctccctctgat    |
| PLCB1_2468   | actgatcttcttctatggctCTTCAGCTTCCCGATATCCGACGGTAGTGTtcacagaggagatcaa     |
| PLCB1_2469   | aagatcactgccaggaccatcCTTCAGCTTCCCGATATCCGACGGTAGTGTgactccctccagtgagga  |
| SYN1_2503    | gttgaaggcattgtcagagaCTTCAGCTTCCCGATATCCGACGGTAGTGTgattttggggttctcagag  |
| SYN1_2504    | cccagccttagccaggacgaCTTCAGCTTCCCGATATCCGACGGTAGTGTgtaacctgtgttctctcc   |
| SYN1_2506    | caccccagctcaagtaaggggacCTTCAGCTTCCCGATATCCGACGGTAGTGTggcaccaccacgca    |
| SYN1_2505    | gtttctggccagctgtgttctCTTCAGCTTCCCGATATCCGACGGTAGTGTctctactctggccagcgg  |
| SYN1_2507    | ggtagggcccagaggcctttggcCTTCAGCTTCCCGATATCCGACGGTAGTGTcgtctggccgagcgtg  |
| SYN1_2508    | ggcgggcagcagcggcccttCTTCAGCTTCCCGATATCCGACGGTAGTGTccccggggcgctccagc    |
| SYN1_2509    | aggcgtggggcaggggctctCTTCAGCTTCCCGATATCCGACGGTAGTGTgagggcggggcgggc      |
| SYN1_2510    | ccaagtcccactcagcggcccCTTCAGCTTCCCGATATCCGACGGTAGTGTggcctccacagcggg     |
| SYN1_2511    | gcttaccctgtgtggggctctCTTCAGCTTCCCGATATCCGACGGTAGTGTcctggcgtggggcctg    |
| SYN1_2513    | gagaggctggcggctcagctCTTCAGCTTCCCGATATCCGACGGTAGTGTtatttttaacctctctgc   |
| SYN1_2514    | gtcttcatctgtgtgtcaccacCTTCAGCTTCCCGATATCCGACGGTAGTGTaagccactagctcagc   |
| SYN1_2515    | catctgtagctgtgtgtcaacCTTCAGCTTCCCGATATCCGACGGTAGTGTctgaagcagctgttac    |
| SYN1_2516    | gtatctccaagacaaagggtggCTTCAGCTTCCCGATATCCGACGGTAGTGTtctaccaccactcccc   |
| SYN1_2517    | gtgggtggacagctcagaCTTCAGCTTCCCGATATCCGACGGTAGTGTggagcaaatctcagctct     |
| SYN1_2518    | gttcctgacactgacgtccttCTTCAGCTTCCCGATATCCGACGGTAGTGTaagcctgtcagctctca   |
| SYN1_2519    | ggaagaccaatactggctctCTTCAGCTTCCCGATATCCGACGGTAGTGTaactacaaggctacatgt   |
| SYN1_2520    | gatgtctggaagctagctgtctCTTCAGCTTCCCGATATCCGACGGTAGTGTggccttggctctcca    |
| SYN1_2521    | caagtgtctgtgactgaccaCTTCAGCTTCCCGATATCCGACGGTAGTGTctgtgtctatgtatacat   |
| SYN1_2523    | gctggcgtgtgcataggtagatCTTCAGCTTCCCGATATCCGACGGTAGTGTcctggagggtacacctt  |
| SYN1_2522    | cagaaagggtgacctcaggcCTTCAGCTTCCCGATATCCGACGGTAGTGTatctacctatgcacagccc  |
| SYN1_2525    | ggggaaaatagatggggcaggaCTTCAGCTTCCCGATATCCGACGGTAGTGTactcactgaccagctct  |
| SYN1_2524    | gctgggtcagtgagctcttCTTCAGCTTCCCGATATCCGACGGTAGTGTcccactctattttcccaaa   |
| SYN1_2526    | catactgcagcccaatgacaaaCTTCAGCTTCCCGATATCCGACGGTAGTGTgggttcaagctccaca   |
| SYN1_2527    | cccaggttaactccttctcattCTTCAGCTTCCCGATATCCGACGGTAGTGTcaactcctaccctg     |
| SYN1_2529    | gaagggtacctgtgtttatCTTCAGCTTCCCGATATCCGACGGTAGTGTgaatcaccagttttttc     |
| SYN1_2528    | aaaactgtgtattcacctacatCTTCAGCTTCCCGATATCCGACGGTAGTGTcaaggtaccctcttat   |
| SYN1_2531    | gggacattggacctgggggtcCTTCAGCTTCCCGATATCCGACGGTAGTGTggcctgtgtttgtctc    |
| SYN1_2530    | agacaaaacacaggcccttgacCTTCAGCTTCCCGATATCCGACGGTAGTGTcaggtccaaatgtccaa  |
| SYN1_2532    | cgcccgctgtctgctgacCTTCAGCTTCCCGATATCCGACGGTAGTGTgagacgtccggcagtg       |
| SYN1_2533    | cagcgagcaggtggcgggcCTTCAGCTTCCCGATATCCGACGGTAGTGTgagaggtcctccggggtc    |
| SYN1_2534    | gacgctgcagctctgtatgaccCTTCAGCTTCCCGATATCCGACGGTAGTGTggaccggggtaggg     |
| SYN1_2535    | gcagccgccccaccggcCTTCAGCTTCCCGATATCCGACGGTAGTGTcggctctggccagaccacc     |
| ARHGEF9_2536 | ccaggtactggcgtgttctCTTCAGCTTCCCGATATCCGACGGTAGTGTaaaataatctgtcctcctg   |
| ARHGEF9_2537 | catcgtcagctgcaggtctCTTCAGCTTCCCGATATCCGACGGTAGTGTgtttacataactataccct   |
| ARHGEF9_2539 | actcagctctgtgaaagactaCTTCAGCTTCCCGATATCCGACGGTAGTGTaagggtgtgtttctca    |
| ARHGEF9_2538 | attttttaaatgagaacacacacCTTCAGCTTCCCGATATCCGACGGTAGTGTtccatagctttcaca   |
| ARHGEF9_2540 | gtctccttgtgtgaagcttaaCTTCAGCTTCCCGATATCCGACGGTAGTGTcttcttctactctcagg   |
| ARHGEF9_2541 | agaagctggaggaaaaaatagCTTCAGCTTCCCGATATCCGACGGTAGTGTgcattgacatggataaa   |
| ARHGEF9_2542 | gtgcacggcagtagtagaaCTTCAGCTTCCCGATATCCGACGGTAGTGTattgaagtcatcatctctgc  |
| ARHGEF9_2543 | gagctcgtctagatgtctctCTTCAGCTTCCCGATATCCGACGGTAGTGTagggaagaaggggcag     |
| ARHGEF9_2544 | gagctgatctacactggggagatCTTCAGCTTCCCGATATCCGACGGTAGTGTcctctctatcccagt   |
| ARHGEF9_2545 | catttctcatgacagccaagCTTCAGCTTCCCGATATCCGACGGTAGTGTcaagctattcagatttccc  |
| ARHGEF9_2546 | gactcagcagatcaacgaacCTTCAGCTTCCCGATATCCGACGGTAGTGTaggagagtggtgttaaga   |
| ARHGEF9_2547 | atcatctgctcaagaggcgaCTTCAGCTTCCCGATATCCGACGGTAGTGTattcactcctgactcctc   |
| ARHGEF9_2548 | cctttgactccagtgcagaaCTTCAGCTTCCCGATATCCGACGGTAGTGTctgagtattgaaacaacc   |
| ARHGEF9_2549 | gacagatcatattcttaggcagaaCTTCAGCTTCCCGATATCCGACGGTAGTGTcatgcaagcatccagg |
| ARHGEF9_2550 | aagccatctgaaatctgtagCTTCAGCTTCCCGATATCCGACGGTAGTGTtccattgtttcctaacac   |
| ARHGEF9_2551 | gtgagagacctggagaaacagCTTCAGCTTCCCGATATCCGACGGTAGTGTgacctaggcttttctttg  |
| ARHGEF9_2552 | agaggcagctgaattggggtCTTCAGCTTCCCGATATCCGACGGTAGTGTctccacatgaaccaccatg  |
| ARHGEF9_2553 | ggggcggcactcagaaccCTTCAGCTTCCCGATATCCGACGGTAGTGTgaaggaagctaaccttat     |



|               |                                                                         |
|---------------|-------------------------------------------------------------------------|
| ARHGEF9_2554  | ctttaaataccaactcccgggtCTTCAGCTTCCCGATATCCGACGGTAGTGTaataggagaggagagtgga |
| ARHGEF9_2555  | gacgtcatcaaaagtctggatgcCTTCAGCTTCCCGATATCCGACGGTAGTGTgtagctgtggactga    |
| ARHGEF9_2557  | atctttgtctgtcttctctCTTCAGCTTCCCGATATCCGACGGTAGTGTaaaaaatcacagacagag     |
| ARHGEF9_2556  | cctgtctctgtctgtatttttCTTCAGCTTCCCGATATCCGACGGTAGTGTaaagacaagacagacaa    |
| ARHGEF9_2559  | gcatgtaaccttggcttcccttCTTCAGCTTCCCGATATCCGACGGTAGTGTggctctcgtcttctca    |
| ARHGEF9_2558  | gaagcaagcagagagcccagcCTTCAGCTTCCCGATATCCGACGGTAGTGTgaagccaaggttacatgca  |
| MECP2_2580    | ccctcggtgttgtacttttCTTCAGCTTCCCGATATCCGACGGTAGTGTtggtttggcttggcaatcc    |
| MECP2_2581    | agggagagcgaagacattgtCTTCAGCTTCCCGATATCCGACGGTAGTGTgctgcaagaggagagaag    |
| MECP2_2582    | gctcaggtaggaggtggggcaCTTCAGCTTCCCGATATCCGACGGTAGTGTactcttagctgctccttg   |
| MECP2_2583    | ccccctgagcccaggacttgaCTTCAGCTTCCCGATATCCGACGGTAGTGTctctcaccaccaagaa     |
| MECP2_2584    | gctcttacaggcttctcagctcttCTTCAGCTTCCCGATATCCGACGGTAGTGTgggagcagtgccacgg  |
| MECP2_2585    | gcggaaaagcaaggagagcagCTTCAGCTTCCCGATATCCGACGGTAGTGTactccccatcaagaagc    |
| MECP2_2587    | gccaaaaaagaagcctggaaggCTTCAGCTTCCCGATATCCGACGGTAGTGTcaccacatcccccaggt   |
| MECP2_2586    | cccgtttcttgggaatggcctgaCTTCAGCTTCCCGATATCCGACGGTAGTGTcctctcccgggtcttg   |
| MECP2_2588    | actttctccaggaccttttctcCTTCAGCTTCCCGATATCCGACGGTAGTGTgctcagcttttctgct    |
| MECP2_2589    | gggaagctccttgaagatgcCTTCAGCTTCCCGATATCCGACGGTAGTGTgaagccaaatctccaa      |
| MECP2_2590    | atcattagggtccaggatgtctCTTCAGCTTCCCGATATCCGACGGTAGTGTggtgcccctctctt      |
| MECP2_2591    | gacttcacgtaactgggagagCTTCAGCTTCCCGATATCCGACGGTAGTGTgctcttaattgttctt     |
| MECP2_2592    | ggtagggtcatcatacatggctCTTCAGCTTCCCGATATCCGACGGTAGTGTtctctgcccctct       |
| MECP2_2593    | ggacacggaagcttaagcaaaCTTCAGCTTCCCGATATCCGACGGTAGTGTcaagcagagacatcagaa   |
| MECP2_2594    | cctcttctcttcttcttcttCTTCAGCTTCCCGATATCCGACGGTAGTGTctgtttggggaggca       |
| MECP2_2595    | catgagccctgcagccatcCTTCAGCTTCCCGATATCCGACGGTAGTGTgtgatactacatactgt      |
| MECP2_2597    | gtatatgtctggttggccaCTTCAGCTTCCCGATATCCGACGGTAGTGTaccagttctcttggatg      |
| MECP2_2596    | catcaagcaggaactggctgaCTTCAGCTTCCCGATATCCGACGGTAGTGTgcaaacaggacatatac    |
| MECP2_2599    | gggaccctggtggccgctggcCTTCAGCTTCCCGATATCCGACGGTAGTGTcgtggcggcgcgcgc      |
| MECP2_2598    | cgcgccgcccagcagccggCTTCAGCTTCCCGATATCCGACGGTAGTGTggcccacggcggctcca      |
| DLGAP3_MIP_1  | gcccgttgcgcttctctcCTTCAGCTTCCCGATATCCGACGGTAGTGTggcccggccggctggcg       |
| DLGAP3_MIP_2  | cctggcggccaagcgcgcttCTTCAGCTTCCCGATATCCGACGGTAGTGTgccccaggaggaga        |
| DLGAP3_MIP_3  | cgaacgcgatggcgcctcagaaCTTCAGCTTCCCGATATCCGACGGTAGTGTatcctcaggaggactc    |
| DLGAP3_MIP_4  | gtaggaggtcccagaaccctCTTCAGCTTCCCGATATCCGACGGTAGTGTgaatttccagagctgctggc  |
| DLGAP3_MIP_5  | aggatgtgacctcaagttctctCTTCAGCTTCCCGATATCCGACGGTAGTGTgctgggctcagacctc    |
| DLGAP3_MIP_6  | actagaaagcagaagaaattCTTCAGCTTCCCGATATCCGACGGTAGTGTacatgtatctgtagga      |
| DLGAP3_MIP_7  | gtgctgtggcagcacacaCTTCAGCTTCCCGATATCCGACGGTAGTGTatggatacacagtccaag      |
| DLGAP3_MIP_8  | catcttgatgaaccactcgcctCTTCAGCTTCCCGATATCCGACGGTAGTGTgaggccatggtcccca    |
| DLGAP3_MIP_9  | gcagatggagcgtgaggcgaCTTCAGCTTCCCGATATCCGACGGTAGTGTcgtactctgtagagc       |
| DLGAP3_MIP_10 | ggtagggccactggccctcctCTTCAGCTTCCCGATATCCGACGGTAGTGTggggagctcagtaaccg    |
| DLGAP3_MIP_11 | cgagggtaccactcctctCTTCAGCTTCCCGATATCCGACGGTAGTGTggccacagaagacaagccc     |
| DLGAP3_MIP_12 | cctggggagagggtggctctCTTCAGCTTCCCGATATCCGACGGTAGTGTtctggaaggagctcaa      |
| DLGAP3_MIP_13 | gagcaaggtcaagcgtctcCTTCAGCTTCCCGATATCCGACGGTAGTGTaagtgcaggttaattctc     |
| DLGAP3_MIP_14 | atctgagatcgtctccactggCTTCAGCTTCCCGATATCCGACGGTAGTGTctatgcagccctctctc    |
| DLGAP3_MIP_15 | ccggaggaggttccactctattggCTTCAGCTTCCCGATATCCGACGGTAGTGTcttggggcagccat    |
| DLGAP3_MIP_16 | gtcttgatgatgagtgtggggcCTTCAGCTTCCCGATATCCGACGGTAGTGTcaccacgccccgacc     |
| DLGAP3_MIP_17 | ccattggggtgcaggtatggaacCTTCAGCTTCCCGATATCCGACGGTAGTGTgctgacactggag      |
| DLGAP3_MIP_18 | gtctggcgggtgatggagatCTTCAGCTTCCCGATATCCGACGGTAGTGTcccggggcggcaccggcg    |
| DLGAP3_MIP_19 | gcaccgactccgcagcagCTTCAGCTTCCCGATATCCGACGGTAGTGTaggcaggccgcagcctca      |
| DLGAP3_MIP_20 | gctccgatgccaagaccctCTTCAGCTTCCCGATATCCGACGGTAGTGTggccggccaggggcagga     |
| DLGAP3_MIP_21 | ccatcaggccgctgctctCTTCAGCTTCCCGATATCCGACGGTAGTGTgctcagcagatgagtgaa      |
| DLGAP3_MIP_22 | aagacctctatctcagaggCTTCAGCTTCCCGATATCCGACGGTAGTGTacaccgaccgcacac        |
| DLGAP3_MIP_23 | aacagtggactcctagaggtCTTCAGCTTCCCGATATCCGACGGTAGTGTctctcaggcactagg       |
| DLGAP3_MIP_24 | cccagatgctgaggaaagaCTTCAGCTTCCCGATATCCGACGGTAGTGTctctcagctcactgtt       |
| DLGAP3_MIP_25 | actgcttgggagatgctctCTTCAGCTTCCCGATATCCGACGGTAGTGTccactctacacatctcc      |
| DLGAP3_MIP_26 | gatcaagtaaggacaggaggcCTTCAGCTTCCCGATATCCGACGGTAGTGTgagcggcagctacatca    |
| DLGAP3_MIP_27 | gtctctcagacatgacctagtCTTCAGCTTCCCGATATCCGACGGTAGTGTctctctcatccccatg     |
| DLGAP3_MIP_28 | ggtatccatcccgccttggCTTCAGCTTCCCGATATCCGACGGTAGTGTagtgcagaagactggtgaag   |
| DLGAP3_MIP_29 | ccaagccaaagcaggacttaCTTCAGCTTCCCGATATCCGACGGTAGTGTgactcggcatgctcatg     |
| DLGAP3_MIP_30 | aaggaccaccaggtccccagCTTCAGCTTCCCGATATCCGACGGTAGTGTactcgttgaccagctg      |
| DLGAP3_MIP_31 | cctggagggtccagatggctctCTTCAGCTTCCCGATATCCGACGGTAGTGTggaccgaaggagatg     |
| DLGAP3_MIP_32 | ggtagtgatggaggtgctgCTTCAGCTTCCCGATATCCGACGGTAGTGTacttcaagttgcatcg       |
| DLGAP3_MIP_33 | accagtcccggcagcgaagaCTTCAGCTTCCCGATATCCGACGGTAGTGTgggggaagcgggactataat  |
| DLGAP3_MIP_34 | ggcagtgcccctcctggcctgCTTCAGCTTCCCGATATCCGACGGTAGTGTcctcagccttggcc       |
| DLGAP3_MIP_35 | gcatccggcactggtcattCTTCAGCTTCCCGATATCCGACGGTAGTGTgaaaagcagttgccagtt     |
| DLGAP3_MIP_36 | cagggtacatcctgggaaggCTTCAGCTTCCCGATATCCGACGGTAGTGTgtgtggaagcactctgt     |
| DLGAP3_MIP_37 | gacacctgtaagactgtgCTTCAGCTTCCCGATATCCGACGGTAGTGTcatttctctgaaggcc        |
| DLGAP3_MIP_38 | ggccctggcagcaggcccCTTCAGCTTCCCGATATCCGACGGTAGTGTctctcaggcctaccgac       |
| DLGAP3_MIP_39 | aggccttcccaccagcccCTTCAGCTTCCCGATATCCGACGGTAGTGTgagccttctgtaggacctg     |

|               |                                                                        |
|---------------|------------------------------------------------------------------------|
| DLGAP3_MIP_40 | catcttttattaggcatccttgtaCTTCAGCTTCCCGATATCCGACGGTAGTGTggctccatggtaacc  |
| SV2A_MIP_1    | gaggatgggtgcagccttggcttCCTCAGCTTCCCGATATCCGACGGTAGTGTggagtgttggctcacag |
| SV2A_MIP_2    | cccttgccttggcagctctctCCTCAGCTTCCCGATATCCGACGGTAGTGTctctgagcaggaccaca   |
| SV2A_MIP_3    | caagagggagagagaaggttgCCTCAGCTTCCCGATATCCGACGGTAGTGTggcattcaggaagccaaaa |
| SV2A_MIP_4    | ggcggactcactgttcccaaaCCTCAGCTTCCCGATATCCGACGGTAGTGTaatcactgcctgcctc    |
| SV2A_MIP_5    | ggacgtgtgactgttgaactctaCCTCAGCTTCCCGATATCCGACGGTAGTGTgctccagctggctcca  |
| SV2A_MIP_6    | gcccaggatgagactgttccCCTCAGCTTCCCGATATCCGACGGTAGTGTcaggaagaagcaggagaca  |
| SV2A_MIP_7    | catgtaggcaccttgcctcCCTCAGCTTCCCGATATCCGACGGTAGTGTtactatcagatctgactca   |
| SV2A_MIP_8    | gggacactggcagtgcttccCCTCAGCTTCCCGATATCCGACGGTAGTGTgacctgttcgagtaagtt   |
| SV2A_MIP_9    | gttagtagggggctctcaaaCCTCAGCTTCCCGATATCCGACGGTAGTGTcagacggctgtccac      |
| SV2A_MIP_10   | gaatcctcaaaggacactgacCCTCAGCTTCCCGATATCCGACGGTAGTGTaacctttgtctgacacc   |
| SV2A_MIP_11   | gttattttgaggatgtcacatccCCTCAGCTTCCCGATATCCGACGGTAGTGTtctcctaaagtgagt   |
| SV2A_MIP_12   | gtccactgcctggagatggcCCTCAGCTTCCCGATATCCGACGGTAGTGTgtgaagttttaaagtcccca |
| SV2A_MIP_13   | cgcatcccgcaccaagtgCCTCAGCTTCCCGATATCCGACGGTAGTGTctctgctgattctaattct    |
| SV2A_MIP_14   | ggaccagacaaagtccagactCCTCAGCTTCCCGATATCCGACGGTAGTGTcaccacacatcaccagc   |
| SV2A_MIP_15   | gtggctgggtgatgtggCCTCAGCTTCCCGATATCCGACGGTAGTGTcaaggtctgactttgtctg     |
| SV2A_MIP_16   | gttacctgggtcaagagaaggCCTCAGCTTCCCGATATCCGACGGTAGTGTtctaccaccccctcac    |
| SV2A_MIP_17   | gacgattcatcaggagatgaaCCTCAGCTTCCCGATATCCGACGGTAGTGTgggtatcatatccacct   |
| SV2A_MIP_18   | gacacaatccccacatccaagtCCTCAGCTTCCCGATATCCGACGGTAGTGTggctgagtcggaggg    |
| SV2A_MIP_19   | cctcccgaactcagactccacCCTCAGCTTCCCGATATCCGACGGTAGTGTggatgtgggattgtct    |
| SV2A_MIP_20   | gcagaacctctgaaaactccaCCTCAGCTTCCCGATATCCGACGGTAGTGTatgcagctcagccccat   |
| SV2A_MIP_21   | agctggagggtctctgctcCCTCAGCTTCCCGATATCCGACGGTAGTGTtattcctctcctcctct     |
| SV2A_MIP_22   | gggccagaactcggagaatagCCTCAGCTTCCCGATATCCGACGGTAGTGTactcgggtggatttcc    |
| SV2A_MIP_23   | ctggctctgcatgtttggatgaCCTCAGCTTCCCGATATCCGACGGTAGTGTgatcaggatcatggcca  |
| SV2A_MIP_24   | gttgactgagagcagatgagcCCTCAGCTTCCCGATATCCGACGGTAGTGTcagtaccaggcacagt    |
| SV2A_MIP_25   | cgcttctgccttctctatctCCTCAGCTTCCCGATATCCGACGGTAGTGTgctgtttctcctccc      |
| SV2A_MIP_26   | cacaaaatacagtgccactggaCCTCAGCTTCCCGATATCCGACGGTAGTGTggagccccatgtct     |
| SV2A_MIP_27   | gacggtgtggaggtcttggCCTCAGCTTCCCGATATCCGACGGTAGTGTggggggagggcacaacg     |
| SV2A_MIP_28   | gccccgggaatgcctcCCTCAGCTTCCCGATATCCGACGGTAGTGTgtctctctgcttctccc        |
| SV2A_MIP_29   | agtctggggcacaaggcagCCTCAGCTTCCCGATATCCGACGGTAGTGTccagatggttattaccga    |
| SV2A_MIP_30   | atattctctgactctgtcCCTCAGCTTCCCGATATCCGACGGTAGTGTtcatgtagcatcactggatg   |
| SV2A_MIP_31   | gaagatcgtactcccgttCCTCAGCTTCCCGATATCCGACGGTAGTGTcatcatggaagggcttc      |
| SV2A_MIP_32   | gctcaaggactgtagatcaCCTCAGCTTCCCGATATCCGACGGTAGTGTttttgacttcttagcaa     |
| SYT2_MIP_1    | gaccagtccgcagctctgtCCTCAGCTTCCCGATATCCGACGGTAGTGTgtgtccgtaaaaggtgg     |
| SYT2_MIP_2    | caagcctgaggaggaggtggaCCTCAGCTTCCCGATATCCGACGGTAGTGTtatgacaagctggcaaga  |
| SYT2_MIP_3    | aatttatcctcatcaacctcaCCTCAGCTTCCCGATATCCGACGGTAGTGTcagaatcttgcctatg    |
| SYT2_MIP_4    | gttgtcttcttcttgaccCCTCAGCTTCCCGATATCCGACGGTAGTGTatacatgttgcctcccc      |
| SYT2_MIP_5    | gtgaagaagaagaccctgaaccCCTCAGCTTCCCGATATCCGACGGTAGTGTgtacattcggcaggaa   |
| SYT2_MIP_6    | cagatgtgccagcttctCCTCAGCTTCCCGATATCCGACGGTAGTGTgggtgccaccactggcagcc    |
| SYT2_MIP_7    | gcccggaaagctactgtctCCTCAGCTTCCCGATATCCGACGGTAGTGTtcaatttggcaagaagag    |
| SYT2_MIP_8    | cggtcaaagtcagatggccatCCTCAGCTTCCCGATATCCGACGGTAGTGTggctcatctctgctct    |
| SYT2_MIP_9    | ccaaacatgacatcattggagagCCTCAGCTTCCCGATATCCGACGGTAGTGTccatagaccctgga    |
| SYT2_MIP_10   | gacataagggtctgaggtgctcCCTCAGCTTCCCGATATCCGACGGTAGTGTgggagctggagtcacc   |
| SYT2_MIP_11   | aggcttctcctcctgacaagCCTCAGCTTCCCGATATCCGACGGTAGTGTgtgtattggagcagt      |
| SYT2_MIP_12   | gctcttctcctcctcccctCCTCAGCTTCCCGATATCCGACGGTAGTGTgttctatccccctccac     |
| SYT2_MIP_13   | gcagtttccctggactatgatCCTCAGCTTCCCGATATCCGACGGTAGTGTgttctcccctttaa      |
| SYT2_MIP_14   | gttcttcttcttctgacgagCCTCAGCTTCCCGATATCCGACGGTAGTGTccttccagcatcaggaa    |
| SYT2_MIP_15   | gagaaggcacaagcctgaagaaCCTCAGCTTCCCGATATCCGACGGTAGTGTatcttctctgtgtggc   |
| SYT2_MIP_16   | actctcagtgagttgtccagCCTCAGCTTCCCGATATCCGACGGTAGTGTtctccaccactagcct     |
| SYT2_MIP_17   | caggaggacatgttgcacaactCCTCAGCTTCCCGATATCCGACGGTAGTGTtctctccaccatgag    |
| SYT2_MIP_18   | agaagctcttatagatcaagaCCTCAGCTTCCCGATATCCGACGGTAGTGTggctctgttctctt      |
| MAPK8_MIP_1   | gctcaggagctcaaggaataCCTCAGCTTCCCGATATCCGACGGTAGTGTtttggatgaagccattaat  |
| MAPK8_MIP_2   | atatcgtttcaggactgtgaaCCTCAGCTTCCCGATATCCGACGGTAGTGTaaatattgccaaagatc   |
| MAPK8_MIP_3   | gcctacagagagctagtctCCTCAGCTTCCCGATATCCGACGGTAGTGTattttgctgaagttttt     |
| MAPK8_MIP_4   | cgcttggcatgagctgattCCTCAGCTTCCCGATATCCGACGGTAGTGTcccaaatattgatcttga    |
| MAPK8_MIP_5   | aagtcgagagacagaaaaatagCCTCAGCTTCCCGATATCCGACGGTAGTGTgtccagcagcaatcta   |
| MAPK8_MIP_6   | ctagatcatgaaagtgtctacCCTCAGCTTCCCGATATCCGACGGTAGTGTttttgtaagttagta     |
| MAPK8_MIP_7   | ccatctgaatcacttggcaaaCCTCAGCTTCCCGATATCCGACGGTAGTGTcctcaatgagaaacaaga  |
| MAPK8_MIP_8   | atgacgccttatgtagctCCTCAGCTTCCCGATATCCGACGGTAGTGTtatcatggcagctatttt     |
| MAPK8_MIP_9   | gttctctgagctctggccagCCTCAGCTTCCCGATATCCGACGGTAGTGTgaaaaaaagctaaatcaga  |
| MAPK8_MIP_10  | gcgatgaactcttatgttctCCTCAGCTTCCCGATATCCGACGGTAGTGTctttgtgctgcaaca      |
| MAPK8_MIP_11  | gtttgcagcacaagaaggaCCTCAGCTTCCCGATATCCGACGGTAGTGTcataaagaagttcatgcc    |
| MAPK8_MIP_12  | gtagtttcaaaagtcataatCCTCAGCTTCCCGATATCCGACGGTAGTGTatctttatgtaatgtcat   |
| MAPK8_MIP_13  | caatgacattaacataaagattCCTCAGCTTCCCGATATCCGACGGTAGTGTtttgactttagaatc    |
| MAPK8_MIP_14  | atatgctggatagcttgaCCTCAGCTTCCCGATATCCGACGGTAGTGTattttcttagctactga      |

|               |                                                                        |
|---------------|------------------------------------------------------------------------|
| MAPK8_MIP_15  | caacgtaagtcttactgttggCTTCAGCTTCCCGATATCCGACGGTAGTGTaccccaatgggattaaa   |
| MAPK8_MIP_16  | atccttctgaagcagaagctCTTCAGCTTCCCGATATCCGACGGTAGTGTgtacattaacaccattatg  |
| MAPK8_MIP_17  | ggagagcttcatctacagagaCTTCAGCTTCCCGATATCCGACGGTAGTGTaataaaaaggtctctcca  |
| MAPK8_MIP_18  | cttctggttttatagtgaCTTCAGCTTCCCGATATCCGACGGTAGTGTggttattattgcttctg      |
| MAPK8_MIP_19  | aggcaataataaccaagtcagtCTTCAGCTTCCCGATATCCGACGGTAGTGTaataaaaccagaagctcc |
| MAPK8_MIP_20  | ccttccttaggttggttacaCTTCAGCTTCCCGATATCCGACGGTAGTGTacatgctgttgagatt     |
| MAPK8_MIP_21  | gccccgtataactcattctCTTCAGCTTCCCGATATCCGACGGTAGTGTaagcctggaataaatga     |
| MAPK8_MIP_22  | cagtctagaagcagcagctgCTTCAGCTTCCCGATATCCGACGGTAGTGTgatttctgtttgttctc    |
| MAPK8_MIP_23  | gtctgtatcagaggccaaagtCTTCAGCTTCCCGATATCCGACGGTAGTGTaataagaccactgaattg  |
| SV2B_MIP_1    | agaagatgcacagatgatgtcCTTCAGCTTCCCGATATCCGACGGTAGTGTcgaggatataagctcaag  |
| SV2B_MIP_2    | ggtaatagccatcactgggagcaCTTCAGCTTCCCGATATCCGACGGTAGTGTcctgcttggccttgaca |
| SV2B_MIP_3    | cgagaccatcatgatgagtgCTTCAGCTTCCCGATATCCGACGGTAGTGTgtatccctcaccagatg    |
| SV2B_MIP_4    | catcttccagctctcagccaCTTCAGCTTCCCGATATCCGACGGTAGTGTaaaactcaccagaact     |
| SV2B_MIP_5    | aagggaaggagaagtaaaattatCTTCAGCTTCCCGATATCCGACGGTAGTGTgatggcagtggggtg   |
| SV2B_MIP_6    | cagcatgtctctggcctcaCTTCAGCTTCCCGATATCCGACGGTAGTGTaatctttgtctttctctc    |
| SV2B_MIP_7    | gcttcttcccagcttatcagcCTTCAGCTTCCCGATATCCGACGGTAGTGTgctccacctccctaaga   |
| SV2B_MIP_8    | catcttctggatgactggggCTTCAGCTTCCCGATATCCGACGGTAGTGTtagtgtatgacttattctt  |
| SV2B_MIP_9    | cccagacaagaattcagaaaaatCTTCAGCTTCCCGATATCCGACGGTAGTGTggcccccttagctgtt  |
| SV2B_MIP_10   | cagagagcccaaggttctgcCTTCAGCTTCCCGATATCCGACGGTAGTGTtttgactcagctcttt     |
| SV2B_MIP_11   | catgaacttcagggccacatgCTTCAGCTTCCCGATATCCGACGGTAGTGTaaagcagcagagtggtg   |
| SV2B_MIP_12   | ccaataagaaggggttctccCTTCAGCTTCCCGATATCCGACGGTAGTGTgtcttcttggtttccac    |
| SV2B_MIP_13   | gtgaaaccaaggaagacacagCTTCAGCTTCCCGATATCCGACGGTAGTGTgaaaccccttctattgg   |
| SV2B_MIP_14   | caagaccatttcaagcaggtCTTCAGCTTCCCGATATCCGACGGTAGTGTgggggttcaaatctctat   |
| SV2B_MIP_15   | accaggttctgttgaacttggCTTCAGCTTCCCGATATCCGACGGTAGTGTggatgttcaggagctgc   |
| SV2B_MIP_16   | atttctgaattcctgtgctcCTTCAGCTTCCCGATATCCGACGGTAGTGTtcttctggtatgggtg     |
| SV2B_MIP_17   | caaccataccagagaaggattCTTCAGCTTCCCGATATCCGACGGTAGTGTcagaggaattcagaat    |
| SV2B_MIP_18   | atcaactcagatggaaaatcaCTTCAGCTTCCCGATATCCGACGGTAGTGTtctgcttctccactc     |
| SV2B_MIP_19   | cttctatttagactgtattctCTTCAGCTTCCCGATATCCGACGGTAGTGTgtcacctctggtgag     |
| SV2B_MIP_20   | gaaatcaaccttttacaacacCTTCAGCTTCCCGATATCCGACGGTAGTGTgggtcaccctcttcca    |
| SV2B_MIP_21   | caaatagcactcgtcaagaCTTCAGCTTCCCGATATCCGACGGTAGTGTtcttggacaacacaagttg   |
| SV2B_MIP_22   | atttacctcgtcagcttctggCTTCAGCTTCCCGATATCCGACGGTAGTGTaacgaaggttcttctt    |
| SV2B_MIP_23   | aggaagtattatctgtccaCTTCAGCTTCCCGATATCCGACGGTAGTGTggaaccaggaatgacc      |
| SV2B_MIP_24   | cctgttctgtggacaagcattCTTCAGCTTCCCGATATCCGACGGTAGTGTcaagacacaggcctcatg  |
| SV2B_MIP_25   | attgagactcactgttccaCTTCAGCTTCCCGATATCCGACGGTAGTGTcaaaaagtcctcaggaa     |
| SV2B_MIP_26   | gctgcttctctggttggCTTCAGCTTCCCGATATCCGACGGTAGTGTtatttccattccttcta       |
| SV2B_MIP_27   | gaagatggggaccacttgggtCTTCAGCTTCCCGATATCCGACGGTAGTGTtttcagtgctctggaca   |
| DLGAP1_MIP_1  | ggcgttggggcctctggcCTTCAGCTTCCCGATATCCGACGGTAGTGTtcttggcggcgccggg       |
| DLGAP1_MIP_2  | atggccgccaagcgcgcgctCTTCAGCTTCCCGATATCCGACGGTAGTGTaaccttctgctttgatca   |
| DLGAP1_MIP_3  | gttctgatctcacactgcatatCTTCAGCTTCCCGATATCCGACGGTAGTGTgaggagggcccttctc   |
| DLGAP1_MIP_4  | ccaaaaccccgcaaatccCTTCAGCTTCCCGATATCCGACGGTAGTGTaatgaaccatacaaatcta    |
| DLGAP1_MIP_5  | catgctgcagttgtccatagCTTCAGCTTCCCGATATCCGACGGTAGTGTtattgaaaatgcctttttg  |
| DLGAP1_MIP_6  | cctagaactggaagagcaacaCTTCAGCTTCCCGATATCCGACGGTAGTGTcatggcactagcagg     |
| DLGAP1_MIP_7  | cagtgggcagtgcccaactcCTTCAGCTTCCCGATATCCGACGGTAGTGTgtgtccattttccta      |
| DLGAP1_MIP_8  | ccaccctcatgctgtctcCTTCAGCTTCCCGATATCCGACGGTAGTGTcagagaagaaaacaaggg     |
| DLGAP1_MIP_9  | ggaagaacgggaaaacaaccCTTCAGCTTCCCGATATCCGACGGTAGTGTgattgacttactcagga    |
| DLGAP1_MIP_10 | gtttctgagccctgaatgctgCTTCAGCTTCCCGATATCCGACGGTAGTGTggcacactgaccttggca  |
| DLGAP1_MIP_11 | cctgtgcccgatgatgacCTTCAGCTTCCCGATATCCGACGGTAGTGTtccatgataatctggaaa     |
| DLGAP1_MIP_12 | cttgggagatagaaaaaagaaatCTTCAGCTTCCCGATATCCGACGGTAGTGTgtctggccatggggcc  |
| DLGAP1_MIP_13 | ccacctggagaatcatcaaaCTTCAGCTTCCCGATATCCGACGGTAGTGTtcaaaaacatcaagacaaa  |
| DLGAP1_MIP_14 | caaaacaggggagaataaagcCTTCAGCTTCCCGATATCCGACGGTAGTGTcaaaaacatccagtcata  |
| DLGAP1_MIP_15 | gcagtgatttgccatgtgCTTCAGCTTCCCGATATCCGACGGTAGTGTtcttatttcaaaggataga    |
| DLGAP1_MIP_16 | gtcaccaccagactaccatagCTTCAGCTTCCCGATATCCGACGGTAGTGTcagccagctctgactcag  |
| DLGAP1_MIP_17 | gtttctgttagtcttgggtggCTTCAGCTTCCCGATATCCGACGGTAGTGTatctgtccaggctctg    |
| DLGAP1_MIP_18 | cacagcccagatgacacagaCTTCAGCTTCCCGATATCCGACGGTAGTGTaaatataaacccacgcaga  |
| DLGAP1_MIP_19 | ggagcagcttctcaatggcccCTTCAGCTTCCCGATATCCGACGGTAGTGTccatagccagcaggg     |
| DLGAP1_MIP_20 | acgagtgctgtcctgaggtcCTTCAGCTTCCCGATATCCGACGGTAGTGTgtgtgctgagctgttct    |
| DLGAP1_MIP_21 | cctctcaagcatctgcaactcCTTCAGCTTCCCGATATCCGACGGTAGTGTggcctcgactccagc     |
| DLGAP1_MIP_22 | ggttgatggagacttcaactcCTTCAGCTTCCCGATATCCGACGGTAGTGTcctgaccaccctgccc    |
| DLGAP1_MIP_23 | gagcctggacagcctggaccCTTCAGCTTCCCGATATCCGACGGTAGTGTcctgcaatttgggaatgga  |
| DLGAP1_MIP_24 | agtctcaactgtctcatccccCTTCAGCTTCCCGATATCCGACGGTAGTGTgactatcgaaagtcagg   |
| DLGAP1_MIP_25 | agtctaaagccttctcaaaaCTTCAGCTTCCCGATATCCGACGGTAGTGTaataggttccacaagatga  |
| DLGAP1_MIP_26 | gatttaacattctatttttCTTCAGCTTCCCGATATCCGACGGTAGTGTatggaatttcatcatctt    |
| DLGAP1_MIP_27 | gatttaacattctatttttCTTCAGCTTCCCGATATCCGACGGTAGTGTatggaatttcatcatctt    |
| DLGAP1_MIP_28 | cttctctatgattgccgaCTTCAGCTTCCCGATATCCGACGGTAGTGTcctttccatagcccaga      |
| DLGAP1_MIP_29 | gcaattctggcctatggaaggCTTCAGCTTCCCGATATCCGACGGTAGTGTcggcaatcatagagag    |

|               |                                                                         |
|---------------|-------------------------------------------------------------------------|
| DLGAP1_MIP_30 | ccatggcctggctcatgttcacCTTCAGCTTCCCGATATCCGACGGTAGTGTgccaagactagaaccag   |
| DLGAP1_MIP_31 | gccagctacctgcaggtaccatttCTTCAGCTTCCCGATATCCGACGGTAGTGTcgctgctgaagaagagc |
| DLGAP1_MIP_32 | gtaggcctccaggaagtactgtgaCTTCAGCTTCCCGATATCCGACGGTAGTGTgctggtgaggaccagg  |
| DLGAP1_MIP_33 | ggagcaacaacacagctcaagtCTTCAGCTTCCCGATATCCGACGGTAGTGTggatggtgacatgtgcatc |
| DLGAP1_MIP_34 | gcgcccgcctcgcctcgtcaggCTTCAGCTTCCCGATATCCGACGGTAGTGTcccagggggcgtggt     |
| DLGAP1_MIP_35 | ggcaaacgcagcaagagcaagCTTCAGCTTCCCGATATCCGACGGTAGTGTcggccgcatccgccact    |
| DLGAP1_MIP_36 | gaactggtccagcaggtggcCTTCAGCTTCCCGATATCCGACGGTAGTGTtggtaagagcttctgga     |
| DLGAP1_MIP_37 | gatggctatcacacctgcagtaCTTCAGCTTCCCGATATCCGACGGTAGTGTaggcactacacctgca    |
| DLGAP1_MIP_38 | gggtggtgctccactgggctcaCTTCAGCTTCCCGATATCCGACGGTAGTGTctcgtccttcagctcttg  |
| DLGAP1_MIP_39 | caccagcggaaactcctccagCTTCAGCTTCCCGATATCCGACGGTAGTGTtatcaggcagccgagcc    |
| DLGAP1_MIP_40 | aagaaaaggcgaagtctaacCTTCAGCTTCCCGATATCCGACGGTAGTGTaggtagcccggtgga       |
| SCN1B_MIP_1   | gtggcgtcgggacacgggCTTCAGCTTCCCGATATCCGACGGTAGTGTgagggggcgcagcacgcgc     |
| SCN1B_MIP_2   | gcgctgctgccccctcCTTCAGCTTCCCGATATCCGACGGTAGTGTccccgtgccgagccac          |
| SCN1B_MIP_3   | gatgacctcaaaattcttgcCTTCAGCTTCCCGATATCCGACGGTAGTGTggtttgtaggggtctgg     |
| SCN1B_MIP_4   | cggtctcagagttcacctccaCTTCAGCTTCCCGATATCCGACGGTAGTGTccgcacaccttgcaaac    |
| SCN1B_MIP_5   | gttaataatagtctgtgattctCTTCAGCTTCCCGATATCCGACGGTAGTGTagtggacctccgca      |
| SCN1B_MIP_6   | ggcagccgggacccaagaCTTCAGCTTCCCGATATCCGACGGTAGTGTggtcaggttaaggaagagag    |
| SCN1B_MIP_7   | gctcatcctccagctgcaacCTTCAGCTTCCCGATATCCGACGGTAGTGTtagcagcagcagctagacg   |
| SCN1B_MIP_8   | gctcctgcccccttaccgtCTTCAGCTTCCCGATATCCGACGGTAGTGTaatgtcaccaaccact       |
| SCN1B_MIP_9   | gctggtgtgctcgtagtttCTTCAGCTTCCCGATATCCGACGGTAGTGTgagccagcctcctct        |
| SCN1B_MIP_10  | gcctctgttccctcagcccaCTTCAGCTTCCCGATATCCGACGGTAGTGTggagagccagatggaggg    |
| SCN1B_MIP_11  | gcctctgttctcagcccaCTTCAGCTTCCCGATATCCGACGGTAGTGTggagagccagatggaggg      |
| SCN1B_MIP_12  | ctggagtggcagggggctCTTCAGCTTCCCGATATCCGACGGTAGTGTctcagagacagaaggacc      |
| SCN1B_MIP_13  | atgaggattgagcagctgcaCTTCAGCTTCCCGATATCCGACGGTAGTGTcacctgtgctgatgacct    |
| SCN1B_MIP_14  | attactgctcaagaagatcgtCTTCAGCTTCCCGATATCCGACGGTAGTGTgacagctggctacc       |
| SCN1B_MIP_15  | agccatagtgtcaaccacCTTCAGCTTCCCGATATCCGACGGTAGTGTtctcctctggcaagtgtga     |
| SCN1B_MIP_16  | gatggctggcagaggggaaggCTTCAGCTTCCCGATATCCGACGGTAGTGTgggtcgtgctgatgatg    |
| SCN1B_MIP_17  | catcatcagaccgaccaacccccCTTCAGCTTCCCGATATCCGACGGTAGTGTccctctgcccagccatc  |
| OTX1_MIP_1    | caccagcctcccagcctcCTTCAGCTTCCCGATATCCGACGGTAGTGTgctggggcgcctccacc       |
| OTX1_MIP_2    | gggtggggcggcggcCTTCAGCTTCCCGATATCCGACGGTAGTGTcagggctgggagggctggtg       |
| OTX1_MIP_3    | gacatcttatcggggaggaggtCTTCAGCTTCCCGATATCCGACGGTAGTGTaccaatgaccgcggc     |
| OTX1_MIP_4    | gggtagcagcttggcgaagCTTCAGCTTCCCGATATCCGACGGTAGTGTgacctctagacctccc       |
| OTX1_MIP_5    | caagaagaagctcctccagctcCTTCAGCTTCCCGATATCCGACGGTAGTGTcaacaagctcccctagc   |
| OTX1_MIP_6    | ggcggctcttggctccgctcCTTCAGCTTCCCGATATCCGACGGTAGTGTccgctgggtggcggaga     |
| OTX1_MIP_7    | atctatctggagccggcctccCTTCAGCTTCCCGATATCCGACGGTAGTGTctgtgtccagctctgct    |
| OTX1_MIP_8    | ccaccgggtcccactagtctCTTCAGCTTCCCGATATCCGACGGTAGTGTcacaacaggggttgctca    |
| OTX1_MIP_9    | gccctccttctactttgCTTCAGCTTCCCGATATCCGACGGTAGTGTgcccggaccattggccgcg      |
| OTX1_MIP_10   | ggtagccttggcgtgagctcCTTCAGCTTCCCGATATCCGACGGTAGTGTggtgtagatgattggccc    |
| OTX1_MIP_11   | accaccaccacaaggctacgCTTCAGCTTCCCGATATCCGACGGTAGTGTcatgcactcaaccac       |
| OTX1_MIP_12   | gtggtggtggcctgaggactCTTCAGCTTCCCGATATCCGACGGTAGTGTggggagttgaagttagtt    |
| OTX1_MIP_13   | ggagaagaacgcaactacgtCTTCAGCTTCCCGATATCCGACGGTAGTGTgattacaaggagcctggc    |
| SCN2A_MIP_1   | ccaacaggaacgcaagatgaCTTCAGCTTCCCGATATCCGACGGTAGTGTtaaaggagcagatgaa      |
| SCN2A_MIP_2   | caatgctgttcaatagcagCTTCAGCTTCCCGATATCCGACGGTAGTGTcatctctgaggaatgtct     |
| SCN2A_MIP_3   | actgctattactaattggttcCTTCAGCTTCCCGATATCCGACGGTAGTGTacttgggaagcagga      |
| SCN2A_MIP_4   | cctattagaanaattagctattCTTCAGCTTCCCGATATCCGACGGTAGTGTtctaataatattctaagt  |
| SCN2A_MIP_5   | aatgtaaaggcaggggtgCTTCAGCTTCCCGATATCCGACGGTAGTGTtagatatttggaaaatgtg     |
| SCN2A_MIP_6   | actggacaaagaatgtagctCTTCAGCTTCCCGATATCCGACGGTAGTGTtggtagtcataaagtaa     |
| SCN2A_MIP_7   | cacagttgtaagaatcgtcCTTCAGCTTCCCGATATCCGACGGTAGTGTaaagaanaattgaggagct    |
| SCN2A_MIP_8   | gttgatttcacagtcattactCTTCAGCTTCCCGATATCCGACGGTAGTGTaatgtgagcttggctat    |
| SCN2A_MIP_9   | atccgtaaaaatgtgaaatctcCTTCAGCTTCCCGATATCCGACGGTAGTGTtctgcaaggcaagcc     |
| SCN2A_MIP_10  | gtcttgagagcttgaactCTTCAGCTTCCCGATATCCGACGGTAGTGTtaaaaaggtcttgatgaa      |
| SCN2A_MIP_11  | gaaagtccaagagctgaacatCTTCAGCTTCCCGATATCCGACGGTAGTGTtaggggttcacacaca     |
| SCN2A_MIP_12  | caccgagctgacttagctcaCTTCAGCTTCCCGATATCCGACGGTAGTGTgtgtgtaacccccatta     |
| SCN2A_MIP_13  | gttcatgggcaactacgaaCTTCAGCTTCCCGATATCCGACGGTAGTGTccccctctgatttgttg      |
| SCN2A_MIP_14  | actgcaatcattagcgcaCTTCAGCTTCCCGATATCCGACGGTAGTGTgctcactgtcctattgaaa     |
| SCN2A_MIP_15  | gttctctaaatataatattctCTTCAGCTTCCCGATATCCGACGGTAGTGTcacttctctttaa        |
| SCN2A_MIP_16  | gtgtcaataacctgccactCTTCAGCTTCCCGATATCCGACGGTAGTGTtctattcttctttaa        |
| SCN2A_MIP_17  | aatcctgtaaaacactcagccCTTCAGCTTCCCGATATCCGACGGTAGTGTggactgaaactagtagg    |
| SCN2A_MIP_18  | gtccttattctctcagctCTTCAGCTTCCCGATATCCGACGGTAGTGTcctgttattgacttctt       |
| SCN2A_MIP_19  | ggggttctaccgcttcaCTTCAGCTTCCCGATATCCGACGGTAGTGTtatgattctcagaaaaatga     |
| SCN2A_MIP_20  | aggaacagaatcaggccacatCTTCAGCTTCCCGATATCCGACGGTAGTGTaaatctctctccatttg    |
| SCN2A_MIP_21  | ataggcattggccaccagcCTTCAGCTTCCCGATATCCGACGGTAGTGTaaacaaggacgctatgc      |
| SCN2A_MIP_22  | gaaaaagagctgaaaaacagaagCTTCAGCTTCCCGATATCCGACGGTAGTGTacatacttggccctt    |
| SCN2A_MIP_23  | ggagctcaactagatgactctCTTCAGCTTCCCGATATCCGACGGTAGTGTaacggaaccttctctc     |
| SCN2A_MIP_24  | ccacaccaggtaaaaatataaaCTTCAGCTTCCCGATATCCGACGGTAGTGTgaaactgtggagaaga    |

|              |                                                                       |
|--------------|-----------------------------------------------------------------------|
| SCN2A_MIP_25 | atctctttcatatgtcagcctCTTCAGCTTCCCGATATCCGACGGTAGTGtactctgaaagcattgtgc |
| SCN2A_MIP_26 | ggctctgagaatgactttgccCTTCAGCTTCCCGATATCCGACGGTAGTGtctctctcatctcattttg |
| SCN2A_MIP_27 | gtcttgagagaaaaaggagccCTTCAGCTTCCCGATATCCGACGGTAGTGtggcacgaacagagagtct |
| SCN2A_MIP_28 | atgcatagcctgtggactgCTTCAGCTTCCCGATATCCGACGGTAGTGtaccttggaggacaatgacag |
| SCN2A_MIP_29 | cccattcatggcagagatggCTTCAGCTTCCCGATATCCGACGGTAGGTcacaactctctcaccatcag |
| SCN2A_MIP_30 | gtattttgaccaacaccatggCTTCAGCTTCCCGATATCCGACGGTAGGTtcatctgaaattctacttc |
| SCN2A_MIP_31 | aacatgataagaactggaccgCTTCAGCTTCCCGATATCCGACGGTAGGTtttcatcattaccaagca  |
| SCN2A_MIP_32 | acctggtgtaatggaccaCTTCAGCTTCCCGATATCCGACGGTAGGTggattctaacttttttctt    |
| SCN2A_MIP_33 | gtttcaccttaaccatggtttaCTTCAGCTTCCCGATATCCGACGGTAGGTcagacagtacactgctg  |
| SCN2A_MIP_34 | gagttataattgcttagtgaacCTTCAGCTTCCCGATATCCGACGGTAGGTcaccatctgcattgtct  |
| SCN2A_MIP_35 | ccttagtttaatggaactgCTTCAGCTTCCCGATATCCGACGGTAGGTataatgaaactactctca    |
| SCN2A_MIP_36 | atccatggcaattatcttgagaCTTCAGCTTCCCGATATCCGACGGTAGGTgtaattaccagccgga   |
| SCN2A_MIP_37 | catcattataatattttgaatCTTCAGCTTCCCGATATCCGACGGTAGGTtttggcaaatgtggaag   |
| SCN2A_MIP_38 | catcgtctcatttttctgtCTTCAGCTTCCCGATATCCGACGGTAGGTcactgttctgtctttatt    |
| SCN2A_MIP_39 | ggccaataccaaggtgaggtCTTCAGCTTCCCGATATCCGACGGTAGGTcaggaaggatggaaaaagt  |
| SCN2A_MIP_40 | atgatggtcatggtgattggaatCTTCAGCTTCCCGATATCCGACGGTAGGTcagcctgacacatgca  |
| SCN2A_MIP_41 | gtttggccagcactccatCTTCAGCTTCCCGATATCCGACGGTAGGTacaaaatattctcagtga     |
| SCN2A_MIP_42 | atgcagaagaatcgattttgCTTCAGCTTCCCGATATCCGACGGTAGGTgtttttctcgtctgttt    |
| SCN2A_MIP_43 | cccacagcaatctggagattCTTCAGCTTCCCGATATCCGACGGTAGGTcagcgtctttttattatt   |
| SCN2A_MIP_44 | gaaaaatatgctggtggaagCTTCAGCTTCCCGATATCCGACGGTAGGTaaaccgcttgaagatct    |
| SCN2A_MIP_45 | gctgcctatgccactagtagtCTTCAGCTTCCCGATATCCGACGGTAGGTctgctgaattcttcagtat |
| SCN2A_MIP_46 | cagggttttaaatgctgCTTCAGCTTCCCGATATCCGACGGTAGGTgagaatctgactttgaaaa     |
| SCN2A_MIP_47 | cctgtttacagaagtaagcCTTCAGCTTCCCGATATCCGACGGTAGGTgttttttggggattgat     |
| SCN2A_MIP_48 | gggagctcaaatcaaccgCTTCAGCTTCCCGATATCCGACGGTAGGTataaataggaaaaatgggt    |
| SCN2A_MIP_49 | aactctggtggaattgaggaCTTCAGCTTCCCGATATCCGACGGTAGGTaatgaatccccaccaaca   |
| SCN2A_MIP_50 | gcttatctgacaacactgaaactCTTCAGCTTCCCGATATCCGACGGTAGGTatcacctaccagagccc |
| SCN2A_MIP_51 | atgagaagaatatgtgtgacgtCTTCAGCTTCCCGATATCCGACGGTAGGTtattctgctgagcagt   |
| SCN2A_MIP_52 | gttgcatatggtttcaagtgtCTTCAGCTTCCCGATATCCGACGGTAGGTaatgaaatttttgactt   |
| SCN2A_MIP_53 | gtgaaaacctgtgcatattCTTCAGCTTCCCGATATCCGACGGTAGGTgaaataagcagcaaatg     |
| SCN2A_MIP_54 | cggtttgaaggatgaggttaCTTCAGCTTCCCGATATCCGACGGTAGGTaaaattgtgtgcttttc    |
| SCN2A_MIP_55 | gacaaagctctcagtgccctCTTCAGCTTCCCGATATCCGACGGTAGGTtcagatgaatgtgtaagac  |
| SCN2A_MIP_56 | gctggcaagtttaccattgtCTTCAGCTTCCCGATATCCGACGGTAGGTtatttttctctcactct    |
| SCN2A_MIP_57 | gagattcactccatgatactgCTTCAGCTTCCCGATATCCGACGGTAGGTtccattttccactg      |
| SCN2A_MIP_58 | gagtctaaagtttttctctcctCTTCAGCTTCCCGATATCCGACGGTAGGTattgagagcaatcaaac  |
| SCN2A_MIP_59 | atattgtaatttagtgatCTTCAGCTTCCCGATATCCGACGGTAGGTgaaaaatgatgacttttct    |
| SCN2A_MIP_60 | gaaaagtcatatcattttcttttCTTCAGCTTCCCGATATCCGACGGTAGGTactaaattacaatatt  |
| SCN2A_MIP_61 | catagataactcaaccaacagCTTCAGCTTCCCGATATCCGACGGTAGGTtacaattctcatattc    |
| SCN2A_MIP_62 | gattcaaggtaaagaatgaaccaCTTCAGCTTCCCGATATCCGACGGTAGGTattgcattttggaggct |
| SCN2A_MIP_63 | catacctcgacctgctgaaCTTCAGCTTCCCGATATCCGACGGTAGGTgcaaaagcacaatttaac    |
| SCN2A_MIP_64 | gtatttctctgttctctgtcaCTTCAGCTTCCCGATATCCGACGGTAGGTtagaaattcgggctgtg   |
| SCN2A_MIP_65 | ggaaccgatgaccagagtcCTTCAGCTTCCCGATATCCGACGGTAGGTtctaatggaactttatcat   |
| SCN2A_MIP_66 | ggtgacctgttaaggcagaCTTCAGCTTCCCGATATCCGACGGTAGGTtagtgaatagtagaacgaa   |
| SCN2A_MIP_67 | ggtaaagaagggtgctttattCTTCAGCTTCCCGATATCCGACGGTAGGTctggattaatctggtgtt  |
| SCN2A_MIP_68 | caccacaaatcaaaaatttctcCTTCAGCTTCCCGATATCCGACGGTAGGTtttgggagttgggatg   |
| SCN2A_MIP_69 | caggattggcgaatcctactCTTCAGCTTCCCGATATCCGACGGTAGGTtaaaattcatttgcacta   |
| SCN2A_MIP_70 | gatcactcggaacaggtaggCTTCAGCTTCCCGATATCCGACGGTAGGTaatcatgaccagaaaagaa  |
| SCN2A_MIP_71 | cctttggcaacagcatgactgCTTCAGCTTCCCGATATCCGACGGTAGGTtcccttctgctgtttt    |
| SCN2A_MIP_72 | atcccaacttccctttaacatCTTCAGCTTCCCGATATCCGACGGTAGGTgtagggctcagactcgg   |
| SCN2A_MIP_73 | cctggttggtgaaacatgtCTTCAGCTTCCCGATATCCGACGGTAGGTtagcacattcttaatagtg   |
| SCN2A_MIP_74 | aagaaaatccaacagatgggCTTCAGCTTCCCGATATCCGACGGTAGGTagaacatctcaaagtcatc  |
| SCN2A_MIP_75 | cctcttctcatgacaaaaccaCTTCAGCTTCCCGATATCCGACGGTAGGTagaagtgcagagcctct   |
| SCN2A_MIP_76 | atccagggcatctgcaaaatcaCTTCAGCTTCCCGATATCCGACGGTAGGTcacttccacaaaacac   |
| SCN2A_MIP_77 | caaagtctctatgagccattacCTTCAGCTTCCCGATATCCGACGGTAGGTgtgagtggtgaccgga   |
| SCN2A_MIP_78 | gaatcgtcttccatctgtaCTTCAGCTTCCCGATATCCGACGGTAGGTcttttaacttttgcctca    |
| SCN2A_MIP_79 | caactccagagaaaaccgatCTTCAGCTTCCCGATATCCGACGGTAGGTgcttacagacgctacctc   |
| SCN2A_MIP_80 | attctcattcagttatcaatCTTCAGCTTCCCGATATCCGACGGTAGGTctgatatttccctttgt    |
| SCN2A_MIP_81 | actcccacagggtctatgcCTTCAGCTTCCCGATATCCGACGGTAGGTaaagacaaatcagaaaagg   |
| ADAM23_MIP_1 | ccccggccgcacgcccctCTTCAGCTTCCCGATATCCGACGGTAGGTcggcggccggagctatga     |
| ADAM23_MIP_2 | gctggcaggcaccagcggcCTTCAGCTTCCCGATATCCGACGGTAGGTcgcaaaaggcaggggcat    |
| ADAM23_MIP_3 | gaaagaaatcacactgcttcaagCTTCAGCTTCCCGATATCCGACGGTAGGTacccttaccctccac   |
| ADAM23_MIP_4 | caatgtattgtcttcatctgccCTTCAGCTTCCCGATATCCGACGGTAGGTtgcctttgtgcaagaa   |
| ADAM23_MIP_5 | gaatctgagttcacaattttactCTTCAGCTTCCCGATATCCGACGGTAGGTcggaagcccttatca   |
| ADAM23_MIP_6 | cagggtcaataaagctttgtCTTCAGCTTCCCGATATCCGACGGTAGGTcttctgtcttttgaatcc   |
| ADAM23_MIP_7 | gattcaaaaagacagaagaacctCTTCAGCTTCCCGATATCCGACGGTAGGTtagcttattgacctgc  |
| ADAM23_MIP_8 | gttaccggctcgcaagtaCTTCAGCTTCCCGATATCCGACGGTAGGTgattgttttaacctccaa     |

|               |                                                                        |
|---------------|------------------------------------------------------------------------|
| ADAM23_MIP_9  | gacacttggaggtttaaaaaaatCTTCAGCTTCCCGATATCCGACGGTAGTGTgacttccgacgcgcg   |
| ADAM23_MIP_10 | gtggctctgtcaacctgcaatCTTCAGCTTCCCGATATCCGACGGTAGTGTtttttctttatggaagca  |
| ADAM23_MIP_11 | cgctctgatgtctccatggtCTTCAGCTTCCCGATATCCGACGGTAGTGTgcacggaagagctactaaa  |
| ADAM23_MIP_12 | gcaactttgtcttggagaagaaCTTCAGCTTCCCGATATCCGACGGTAGTGTgtgtggttctctttgtg  |
| ADAM23_MIP_13 | gcacaaaagaaccacacaaaaCTTCAGCTTCCCGATATCCGACGGTAGTGTctctcaaaagacaaagt   |
| ADAM23_MIP_14 | gcaaatgaagaatctcagtaagCTTCAGCTTCCCGATATCCGACGGTAGTGTaaagtccaacactgtt   |
| ADAM23_MIP_15 | aggttttctggattatatgtggtCTTCAGCTTCCCGATATCCGACGGTAGTGTtccacttccaacaagcc |
| ADAM23_MIP_16 | cctattttactcaatgaagtcCTTCAGCTTCCCGATATCCGACGGTAGTGTattttgactaacttttcc  |
| ADAM23_MIP_17 | cagaaaaggaaaaatagatctCTTCAGCTTCCCGATATCCGACGGTAGTGTcactgacttctaggta    |
| ADAM23_MIP_18 | gtaagaatatagagtcagtggtCTTCAGCTTCCCGATATCCGACGGTAGTGTtagtgagcactagagaga |
| ADAM23_MIP_19 | gttttggatcattaaacatCTTCAGCTTCCCGATATCCGACGGTAGTGTaaatcaagtcaactaatatg  |
| ADAM23_MIP_20 | gtccaagatggaatggttaCTTCAGCTTCCCGATATCCGACGGTAGTGTggcagtgactggtatgta    |
| ADAM23_MIP_21 | aatacataccagtcactgccCTTCAGCTTCCCGATATCCGACGGTAGTGTaaaccattccacttggc    |
| ADAM23_MIP_22 | gttctcaaaataccggcagcgCTTCAGCTTCCCGATATCCGACGGTAGTGTactgtctgtgtatacc    |
| ADAM23_MIP_23 | gagcatctgcacagggtggtCTTCAGCTTCCCGATATCCGACGGTAGTGTgaaccaaaaaaggataa    |
| ADAM23_MIP_24 | atctttgcatctgttcttttCTTCAGCTTCCCGATATCCGACGGTAGTGTatagactgctttttct     |
| ADAM23_MIP_25 | gaaaaagcagtgctatcagaaaCTTCAGCTTCCCGATATCCGACGGTAGTGTgaacagatgcaaatgta  |
| ADAM23_MIP_26 | actgaccttctactatttcaCTTCAGCTTCCCGATATCCGACGGTAGTGTctccacacacttcaa      |
| ADAM23_MIP_27 | agagttgaaagtgtgtggagCTTCAGCTTCCCGATATCCGACGGTAGTGTgaaaaatgagtaagaaggt  |
| ADAM23_MIP_28 | cttttgcataaattgctgtCTTCAGCTTCCCGATATCCGACGGTAGTGTtcttttctcttttct       |
| ADAM23_MIP_29 | agaagaaaaaggaaacaaagaCTTCAGCTTCCCGATATCCGACGGTAGTGTacacagcaattttgcaaa  |
| ADAM23_MIP_30 | cctttcaacaggccaacaaaCTTCAGCTTCCCGATATCCGACGGTAGTGTctgatgattgcttttgta   |
| ADAM23_MIP_31 | ggctccactctctgtgtaaCTTCAGCTTCCCGATATCCGACGGTAGTGTacaagaacctgctttcc     |
| ADAM23_MIP_32 | atcttactgtgcaaacaggCTTCAGCTTCCCGATATCCGACGGTAGTGTccctctgtcctaactctc    |
| ADAM23_MIP_33 | gagattaggacagagaaggaaaCTTCAGCTTCCCGATATCCGACGGTAGTGTgtttgcaccaagtaagat |
| ADAM23_MIP_34 | gtttctgacagtttcatcttctCTTCAGCTTCCCGATATCCGACGGTAGTGTgctcttcgctactcac   |
| ADAM23_MIP_35 | acacttcacgtgagtaagcgCTTCAGCTTCCCGATATCCGACGGTAGTGTtaaaagaagatgaaactg   |
| ADAM23_MIP_36 | catttactgtacaggttggtCTTCAGCTTCCCGATATCCGACGGTAGTGTatattgaattttgattt    |
| ADAM23_MIP_37 | caaatcaaaattcaatataagaCTTCAGCTTCCCGATATCCGACGGTAGTGTactgtacaagtaaaat   |
| ADAM23_MIP_38 | gtaatttaaaaggattcatCTTCAGCTTCCCGATATCCGACGGTAGTGTattatctgaagttacctagc  |
| ADAM23_MIP_39 | cagcatgtagtaccttcaCTTCAGCTTCCCGATATCCGACGGTAGTGTtttcaatgaactctttta     |
| ADAM23_MIP_40 | cattttcttaatagtttcttctCTTCAGCTTCCCGATATCCGACGGTAGTGTgctccacatgtgtgc    |
| ADAM23_MIP_41 | gggacaggagcacacatgtCTTCAGCTTCCCGATATCCGACGGTAGTGTgcagagaagaacactattaa  |
| ADAM23_MIP_42 | agtgtcagctctaaggccaCTTCAGCTTCCCGATATCCGACGGTAGTGTctctcttgcctatctccaa   |
| ADAM23_MIP_43 | ggagataggcaagagaagaaaaCTTCAGCTTCCCGATATCCGACGGTAGTGTcttagagtgaccactca  |
| ADAM23_MIP_44 | gggtgattgactgcaggttaaCTTCAGCTTCCCGATATCCGACGGTAGTGTtctgttttttctttacac  |
| ADAM23_MIP_45 | gcctgatggtagaaggaagtCTTCAGCTTCCCGATATCCGACGGTAGTGTcttctctgtgaaaaact    |
| ADAM23_MIP_46 | gccctaaatatgagcagctgtCTTCAGCTTCCCGATATCCGACGGTAGTGTatgggtatctttctgttt  |
| ADAM23_MIP_47 | gaattgtagcacttccgctCTTCAGCTTCCCGATATCCGACGGTAGTGTattaagttccagcactgt    |
| ADAM23_MIP_48 | cccaagggttgggtatcttCTTCAGCTTCCCGATATCCGACGGTAGTGTccatctgttctcttttct    |
| ADAM23_MIP_49 | ggggtgaagttcctaactgCTTCAGCTTCCCGATATCCGACGGTAGTGTcagatattctatgtgtctc   |
| ADAM23_MIP_50 | gccgatgtcttctctcagCTTCAGCTTCCCGATATCCGACGGTAGTGTatgactctctccatgat      |
| ADAM23_MIP_51 | gatcatgggaagagatcatatCTTCAGCTTCCCGATATCCGACGGTAGTGTgagaagaagacatcgcg   |
| ADAM23_MIP_52 | cagcagtggtactggaactattCTTCAGCTTCCCGATATCCGACGGTAGTGTtcttcttactcactctg  |
| ADAM23_MIP_53 | ccagagtgagtcaaaagaagatCTTCAGCTTCCCGATATCCGACGGTAGTGTagtccagtaaacactgct |
| EPHA6_MIP_1   | cctggacctctgctcttctCTTCAGCTTCCCGATATCCGACGGTAGTGTccaagtgaatgctctcg     |
| EPHA6_MIP_2   | gcaggtgcagctgcttccgagCTTCAGCTTCCCGATATCCGACGGTAGTGTgtaggggtctctgtccac  |
| EPHA6_MIP_3   | gggctgcaagtcgggaattCTTCAGCTTCCCGATATCCGACGGTAGTGTgggtggagggaagagg      |
| EPHA6_MIP_4   | ggctctcttctctctctctctctCTTCAGCTTCCCGATATCCGACGGTAGTGTcggcctctctacc     |
| EPHA6_MIP_5   | actggttgcctctgaggtCTTCAGCTTCCCGATATCCGACGGTAGTGTaatttggtttctcttctct    |
| EPHA6_MIP_6   | gtcttttttagatttttaagatCTTCAGCTTCCCGATATCCGACGGTAGTGTagaattcatggaatttt  |
| EPHA6_MIP_7   | aattaaatagaaaaataaaattCTTCAGCTTCCCGATATCCGACGGTAGTGTactattaggagatctta  |
| EPHA6_MIP_8   | cccgtgatgagctcagaaaCTTCAGCTTCCCGATATCCGACGGTAGTGTattacttttctcttctg     |
| EPHA6_MIP_9   | atccagttgtacgaagcagctCTTCAGCTTCCCGATATCCGACGGTAGTGTggactcactgattccat   |
| EPHA6_MIP_10  | atcgcatctcaaaactcaacCTTCAGCTTCCCGATATCCGACGGTAGTGTctgcaaaagaacattaat   |
| EPHA6_MIP_11  | cccaaatccatctgggtaaaaCTTCAGCTTCCCGATATCCGACGGTAGTGTattctgtgaaaaacacg   |
| EPHA6_MIP_12  | cctctttggttgaagtacggCTTCAGCTTCCCGATATCCGACGGTAGTGTgattttatctggctttcaa  |
| EPHA6_MIP_13  | ggaatcaaccttggaaatgtaCTTCAGCTTCCCGATATCCGACGGTAGTGTcatatctgtactgcaga   |
| EPHA6_MIP_14  | aaaaagtttatttttaaatCTTCAGCTTCCCGATATCCGACGGTAGTGTggagctgatggagattggc   |
| EPHA6_MIP_15  | aagggttatttccgagctgaCTTCAGCTTCCCGATATCCGACGGTAGTGTaaagtgtttttctcttt    |
| EPHA6_MIP_16  | ccatgtatgttaaactgtgtgCTTCAGCTTCCCGATATCCGACGGTAGTGTaaaagacaaaagggtt    |
| EPHA6_MIP_17  | gacacaggagggaagaaaCTTCAGCTTCCCGATATCCGACGGTAGTGTgccataattcattgtcctat   |
| EPHA6_MIP_18  | ggtggctcattcaaaaatCTTCAGCTTCCCGATATCCGACGGTAGTGTtggatgagcctgtatg       |
| EPHA6_MIP_19  | agtttttctccaagcattcaCTTCAGCTTCCCGATATCCGACGGTAGTGTgtggaggagactccg      |
| EPHA6_MIP_20  | aagggttaattcagtgagacCTTCAGCTTCCCGATATCCGACGGTAGTGTaaagaattatgggtctg    |

|               |                                                                        |
|---------------|------------------------------------------------------------------------|
| EPHA6_MIP_21  | cattctggactacgagatcaaCTTCAGCTTCCCGATATCCGACGGTAGTGTtctctgccaattaattctt |
| EPHA6_MIP_22  | caggtgcttccatgataggtCTTCAGCTTCCCGATATCCGACGGTAGTGTaatatagataaacgacatgc |
| EPHA6_MIP_23  | cacatccgagtgagaactgcCTTCAGCTTCCCGATATCCGACGGTAGTGTaactctgtttcattctctt  |
| EPHA6_MIP_24  | gctttggaccttggaagagCTTCAGCTTCCCGATATCCGACGGTAGTGTgaaactacttcatctcc     |
| EPHA6_MIP_25  | gtgtccaagtttttaagcttgCTTCAGCTTCCCGATATCCGACGGTAGTGTacaggatacagtggt     |
| EPHA6_MIP_26  | caggctccaatgatgtctCTTCAGCTTCCCGATATCCGACGGTAGTGTctcttggttcattatattcc   |
| EPHA6_MIP_27  | gaaccaagagaaaataatagactCTTCAGCTTCCCGATATCCGACGGTAGTGTgactctggattggccc  |
| EPHA6_MIP_28  | actttattcttctgatcactggCTTCAGCTTCCCGATATCCGACGGTAGTGTgtgaaatgcaccagg    |
| EPHA6_MIP_29  | aggatgacgaggagagtgaatccCTTCAGCTTCCCGATATCCGACGGTAGTGTcctcaggtgtcttgt   |
| EPHA6_MIP_30  | cgcaggactttcttctcattCTTCAGCTTCCCGATATCCGACGGTAGTGTtgtatgcatcactctt     |
| EPHA6_MIP_31  | gaagtatgatcacaatgcaaaCTTCAGCTTCCCGATATCCGACGGTAGTGTagaagctctgcgct      |
| EPHA6_MIP_32  | cctcaagaatcgattagagagCTTCAGCTTCCCGATATCCGACGGTAGTGTctcaaaactaatcaat    |
| EPHA6_MIP_33  | cctttgcaaattcatggactgCTTCAGCTTCCCGATATCCGACGGTAGTGTgccaagatttaagatagt  |
| EPHA6_MIP_34  | actttgaaaggtggccacatgCTTCAGCTTCCCGATATCCGACGGTAGTGTactcttctgaaatgtaagt |
| EPHA6_MIP_35  | gatctctctttccctggtctCTTCAGCTTCCCGATATCCGACGGTAGTGTtttgggtgacaacctt     |
| EPHA6_MIP_36  | attaaaggaataacttagttcagCTTCAGCTTCCCGATATCCGACGGTAGTGTccaacatcattcgct   |
| EPHA6_MIP_37  | catccagtgccagggggaggCTTCAGCTTCCCGATATCCGACGGTAGTGTgcttttcataaagaagac   |
| EPHA6_MIP_38  | ggggcctggatgctattaaaCTTCAGCTTCCCGATATCCGACGGTAGTGTtcatttgtattggggcc    |
| EPHA6_MIP_39  | gttctatatttaactattatcaCTTCAGCTTCCCGATATCCGACGGTAGTGTgtatctcttctct      |
| EPHA6_MIP_40  | gttaagagataaccagctggCTTCAGCTTCCCGATATCCGACGGTAGTGTaacaccttaccgcaaaa    |
| EPHA6_MIP_41  | gatatgggttattgtctcagCTTCAGCTTCCCGATATCCGACGGTAGTGTgcacacactgcatataaa   |
| EPHA6_MIP_42  | gaaagatactcatgctgatgCTTCAGCTTCCCGATATCCGACGGTAGTGTtgggtataagcagcttc    |
| EPHA6_MIP_43  | ccttctaattttctgtgtaCTTCAGCTTCCCGATATCCGACGGTAGTGTtggctctccagagtgct     |
| EPHA6_MIP_44  | aagacatagcctacaccaaCTTCAGCTTCCCGATATCCGACGGTAGTGTgataaattacagttctgta   |
| EPHA6_MIP_45  | gttaacagaactgtaattatgcaCTTCAGCTTCCCGATATCCGACGGTAGTGTgggtgtaggctatgct  |
| EPHA6_MIP_46  | gtcatgtcctatggagagagaCTTCAGCTTCCCGATATCCGACGGTAGTGTgactaagaaatccaatt   |
| EPHA6_MIP_47  | cccacatgacaatgcatagcCTTCAGCTTCCCGATATCCGACGGTAGTGTgaggacaaaaggcataat   |
| EPHA6_MIP_48  | gaaggagagaaatcacagaccCTTCAGCTTCCCGATATCCGACGGTAGTGTgctcaaaaaaagagagt   |
| EPHA6_MIP_49  | gccagcagtgaggactcagcCTTCAGCTTCCCGATATCCGACGGTAGTGTaaaaaacacattatgcc    |
| EPHA6_MIP_50  | ctggcagcagggtttcaaaCTTCAGCTTCCCGATATCCGACGGTAGTGTctcatgtttttgttt       |
| EPHA6_MIP_51  | agttattctgtattgccccatCTTCAGCTTCCCGATATCCGACGGTAGTGTggtgtctgtatagca     |
| EPHA6_MIP_52  | gtatgaaagtaccacaagcaccCTTCAGCTTCCCGATATCCGACGGTAGTGTtctctctcttctt      |
| EPHA6_MIP_53  | gaaatccctctctctgtatgCTTCAGCTTCCCGATATCCGACGGTAGTGTgctgcaacagaagactg    |
| CPLX1_MIP_1   | caggatgctctctctctctctCTTCAGCTTCCCGATATCCGACGGTAGTGTtccctcagggcctcc     |
| CPLX1_MIP_2   | caggacatgctcaagaagtagccCTTCAGCTTCCCGATATCCGACGGTAGTGTatggaggccaactccga |
| CPLX1_MIP_3   | ccggcgggccgagcctctctCTTCAGCTTCCCGATATCCGACGGTAGTGTcttcttggggccgctcaagc |
| CPLX1_MIP_4   | ccttcttggcggctctgggtCTTCAGCTTCCCGATATCCGACGGTAGTGTaggcggggccggccggcg   |
| CPLX1_MIP_5   | aggagcgcaaggccaagtacCTTCAGCTTCCCGATATCCGACGGTAGTGTggtctgaatcaccactct   |
| CPLX1_MIP_6   | cagaactcacagcaagtgctCTTCAGCTTCCCGATATCCGACGGTAGTGTctgtgtgggtctctc      |
| CPLX1_MIP_7   | acatggagagaccacagcaCTTCAGCTTCCCGATATCCGACGGTAGTGTgccatacttgcgtgtgag    |
| SLC1A3_MIP_1  | gaacattacaaggaggatgtaCTTCAGCTTCCCGATATCCGACGGTAGTGTagaagagacctctag     |
| SLC1A3_MIP_2  | gactcctgctggaatctctctCTTCAGCTTCCCGATATCCGACGGTAGTGTaatcaaatgactacca    |
| SLC1A3_MIP_3  | cctaggcttctctgacttgaCTTCAGCTTCCCGATATCCGACGGTAGTGTcagtcaccctgctcatt    |
| SLC1A3_MIP_4  | gggaactctgatgagatgCTTCAGCTTCCCGATATCCGACGGTAGTGTtcttctgtttcaaaaag      |
| SLC1A3_MIP_5  | ggagaagtactgactcccCTTCAGCTTCCCGATATCCGACGGTAGTGTtctttgcaataaacacac     |
| SLC1A3_MIP_6  | catcatccatctgggaaggCTTCAGCTTCCCGATATCCGACGGTAGTGTatcttctgtttgctccac    |
| SLC1A3_MIP_7  | gacaatgattgccaatcaccacCTTCAGCTTCCCGATATCCGACGGTAGTGTacccaaaaggcgggc    |
| SLC1A3_MIP_8  | ccctcttccctgctcattCTTCAGCTTCCCGATATCCGACGGTAGTGTaaagtactattactctt      |
| SLC1A3_MIP_9  | caaagaaagtaatagtcactgCTTCAGCTTCCCGATATCCGACGGTAGTGTgagcagggaaaagagg    |
| SLC1A3_MIP_10 | gaatcacagaggagctgctCTTCAGCTTCCCGATATCCGACGGTAGTGTctgtgtcttttatttt      |
| SLC1A3_MIP_11 | agacacattgttatcacagcaCTTCAGCTTCCCGATATCCGACGGTAGTGTcctcatgtttccaatca   |
| SLC1A3_MIP_12 | ggtagcagtaataatgtgtatgCTTCAGCTTCCCGATATCCGACGGTAGTGTaatggagtaagctcc    |
| SLC1A3_MIP_13 | gtctcatgatggcttctgtaaCTTCAGCTTCCCGATATCCGACGGTAGTGTgagataactgcaattggcc |
| SLC1A3_MIP_14 | ggcttactcattcacgagctcatCTTCAGCTTCCCGATATCCGACGGTAGTGTctgtgtgtcttctccc  |
| SLC1A3_MIP_15 | cccccaatcacacctgtcttctCTTCAGCTTCCCGATATCCGACGGTAGTGTgcttgcaaacctctt    |
| SLC1A3_MIP_16 | gggtgtaggagaagcatttCTTCAGCTTCCCGATATCCGACGGTAGTGTgaaaaaaccttgggtttt    |
| SLC1A3_MIP_17 | actgccctctatgagcttggCTTCAGCTTCCCGATATCCGACGGTAGTGTgacctattcactgtct     |
| SLC1A3_MIP_18 | cggggagcacgaatctggtgCTTCAGCTTCCCGATATCCGACGGTAGTGTatagacacttttctgtgac  |
| SLC1A3_MIP_19 | cttgaggccagagttcaagCTTCAGCTTCCCGATATCCGACGGTAGTGTtctggacaaattattacaat  |
| SLC1A3_MIP_20 | gctcatcatcgctggactCTTCAGCTTCCCGATATCCGACGGTAGTGTctgttctggtactctgtta    |
| SLC1A3_MIP_21 | gatgtctgctggcaggcCTTCAGCTTCCCGATATCCGACGGTAGTGTtctcagagttcttctgta      |
| SLC1A3_MIP_22 | gggtaactcagtgattgaagagCTTCAGCTTCCCGATATCCGACGGTAGTGTtttccctctcccacc    |
| SLC1A3_MIP_23 | cagttcatgtctgacaagtgCTTCAGCTTCCCGATATCCGACGGTAGTGTatgttagtctacatctg    |
| SLC1A3_MIP_24 | atcttcccttctctctctgtaCTTCAGCTTCCCGATATCCGACGGTAGTGTagaaacctatcgacag    |
| GABRA1_MIP_1  | gactggaagaagtgaggacCTTCAGCTTCCCGATATCCGACGGTAGTGTataacctgatgttcttgc    |

|               |                                                                        |
|---------------|------------------------------------------------------------------------|
| GABRA1_MIP_2  | cctcatcgcggctggagcaCTTCAGCTTCCCGATATCCGACGGTAGTGTccccgataaaataaatgaaa  |
| GABRA1_MIP_3  | gattgggaggtaggttgcattCCTCAGCTTCCCGATATCCGACGGTAGTGTtattgcttcttattgttt  |
| GABRA1_MIP_4  | gtccaaatctggtgaagacCTTCAGCTTCCCGATATCCGACGGTAGTGTtttgaccatttagaggtaa   |
| GABRA1_MIP_5  | catgatatggaatggaactCTTCAGCTTCCCGATATCCGACGGTAGTGTcagatgtggtggtgaga     |
| GABRA1_MIP_6  | gaaacgggtccgaaactggtCTTCAGCTTCCCGATATCCGACGGTAGTGTcacaaaagtagccaaga    |
| GABRA1_MIP_7  | ggactccggacacatttttCCTCAGCTTCCCGATATCCGACGGTAGTGTcgtcattttccaaaattacc  |
| GABRA1_MIP_8  | gattttacttccattaggttattCCTCAGCTTCCCGATATCCGACGGTAGTGTgcagccatccttacc   |
| GABRA1_MIP_9  | ccttgtttcaaccttaacaatCCTCAGCTTCCCGATATCCGACGGTAGTGTtaggatggcaccttgcgt  |
| GABRA1_MIP_10 | acttttcttgattgaagtcttaCCTCAGCTTCCCGATATCCGACGGTAGTGTttgttattctatg      |
| GABRA1_MIP_11 | gggaaacatagaatacaacaCCTCAGCTTCCCGATATCCGACGGTAGTGTtaaatgacttaacaaga    |
| GABRA1_MIP_12 | acgtctaaaccagatgacctCCTCAGCTTCCCGATATCCGACGGTAGTGTtagagaattgaagtggtaaa |
| GABRA1_MIP_13 | cgtgctgctctctgtccaCCTCAGCTTCCCGATATCCGACGGTAGTGTtcttcttccataactga      |
| GABRA1_MIP_14 | gtgattctctcacaagtctccCCTCAGCTTCCCGATATCCGACGGTAGTGTaaagtcaaatgtctcatct |
| GABRA1_MIP_15 | gaataacaaagtagccaattcttCCTCAGCTTCCCGATATCCGACGGTAGTGTataccttcttgcgt    |
| GABRA1_MIP_16 | ggtttattgctgtgctatCCTCAGCTTCCCGATATCCGACGGTAGTGTcagatgaaactggcatca     |
| GABRA1_MIP_17 | ccatagctgtgcataagccCCTCAGCTTCCCGATATCCGACGGTAGTGTtaaaagcattacctttct    |
| GABRA1_MIP_18 | gtttggcctgtgattggCCTCAGCTTCCCGATATCCGACGGTAGTGTtccacagtaaaactttca      |
| GABRA1_MIP_19 | accctaattggccaggggCCTCAGCTTCCCGATATCCGACGGTAGTGTtccagcaattataatttgc    |
| GABRA1_MIP_20 | gctgttgctgtggagcgtCCTCAGCTTCCCGATATCCGACGGTAGTGTttgtgctgacactgtaaaagg  |
| GABRA1_MIP_21 | ctaaaagccccacacacatcCCTCAGCTTCCCGATATCCGACGGTAGTGTaccacagaaaccaagaa    |
| GABRA1_MIP_22 | gaggctctctgtttaaatacCCTCAGCTTCCCGATATCCGACGGTAGTGTtctttaaagcagaggcaa   |
| GABRG2_MIP_1  | gacggtgtgattctgctctCCTCAGCTTCCCGATATCCGACGGTAGTGTaaaggggagggtcttct     |
| GABRG2_MIP_2  | actgagcttctgtctccatCCTCAGCTTCCCGATATCCGACGGTAGTGTtccccaccttcccc        |
| GABRG2_MIP_3  | cctgagggtgatgctactgctCCTCAGCTTCCCGATATCCGACGGTAGTGTaaaagtcaactgtgtgta  |
| GABRG2_MIP_4  | catcatcagatttctggctagCCTCAGCTTCCCGATATCCGACGGTAGTGTaaacctctatcaggc     |
| GABRG2_MIP_5  | caaggaagattaaattatacttCCTCAGCTTCCCGATATCCGACGGTAGTGTcggaaagatagaca     |
| GABRG2_MIP_6  | gttgagagaaaaatgtatgCCTCAGCTTCCCGATATCCGACGGTAGTGTcatttctatgttctctta    |
| GABRG2_MIP_7  | gtgtgcacatagagaggtgcCCTCAGCTTCCCGATATCCGACGGTAGTGTcatgctaataaacagacaa  |
| GABRG2_MIP_8  | catggtgggaaatctggaCCTCAGCTTCCCGATATCCGACGGTAGTGTactgtgtacaaattctgt     |
| GABRG2_MIP_9  | ggtgctgttaaattcaaacCCTCAGCTTCCCGATATCCGACGGTAGTGTcattccaattctcagca     |
| GABRG2_MIP_10 | gttaggaagaaaacaacaaCCTCAGCTTCCCGATATCCGACGGTAGTGTcacttctcagaaattcca    |
| GABRG2_MIP_11 | actcctgcccttggagttCCTCAGCTTCCCGATATCCGACGGTAGTGTcatttaaaattgtgcaaat    |
| GABRG2_MIP_12 | gtgcaattgtaattggcactcagCCTCAGCTTCCCGATATCCGACGGTAGTGTtatgcttcttcaatta  |
| GABRG2_MIP_13 | ccttggcctccagagtagctCCTCAGCTTCCCGATATCCGACGGTAGTGTgttgtgtgtgtgttt      |
| GABRG2_MIP_14 | cagaagcgaaggctgtagtCCTCAGCTTCCCGATATCCGACGGTAGTGTgataatccagcttgggc     |
| GABRG2_MIP_15 | ataccaccgaagtagtgaagacCCTCAGCTTCCCGATATCCGACGGTAGTGTgagcttctctatctcag  |
| GABRG2_MIP_16 | gtgtgccacctcaacagaCCTCAGCTTCCCGATATCCGACGGTAGTGTataccaaaattcaactct     |
| GABRG2_MIP_17 | cctatcctgggtgtcttctgCCTCAGCTTCCCGATATCCGACGGTAGTGTaaaaggtgtatgtgtt     |
| GABRG2_MIP_18 | caatgagtgctcaggggataCCTCAGCTTCCCGATATCCGACGGTAGTGTatggacataaaaactctg   |
| GABRG2_MIP_19 | gtctcctatgtcacagcagatCCTCAGCTTCCCGATATCCGACGGTAGTGTcacagtgactcagttac   |
| GABRG2_MIP_20 | gggagcatttccgggcaatCCTCAGCTTCCCGATATCCGACGGTAGTGTtatcttctgcttctggtg    |
| GABRG2_MIP_21 | caggctaaggctcagcagttCCTCAGCTTCCCGATATCCGACGGTAGTGTattttgtcagcaaccgga   |
| GABRG2_MIP_22 | gtttatgagtagacatttaagCCTCAGCTTCCCGATATCCGACGGTAGTGTtctcttctgtctaca     |
| GABRG2_MIP_23 | gggtttgtagacagaaaagCCTCAGCTTCCCGATATCCGACGGTAGTGTgcttaaatgtctactcat    |
| GABRG2_MIP_24 | actgtgccagtttttctgctCCTCAGCTTCCCGATATCCGACGGTAGTGTtcttccacctctgctc     |
| GABRG2_MIP_25 | ccagacactcatagcctactCCTCAGCTTCCCGATATCCGACGGTAGTGTaaggcagtgaggaaag     |
| GABRG2_MIP_26 | gagagatgctgttctaagtccCCTCAGCTTCCCGATATCCGACGGTAGTGTgactcctatgctcga     |
| GNAI1_MIP_1   | caacctcgtgaggacggcgaCCTCAGCTTCCCGATATCCGACGGTAGTGTgattccccctgtcttggag  |
| GNAI1_MIP_2   | ggtcgatcatcttactcgtctCCTCAGCTTCCCGATATCCGACGGTAGTGTaaaccggaggccg       |
| GNAI1_MIP_3   | caccaaattgctgttaagttaCCTCAGCTTCCCGATATCCGACGGTAGTGTgtgtgtgggagtgaa     |
| GNAI1_MIP_4   | caactcccaacacacaaacCCTCAGCTTCCCGATATCCGACGGTAGTGTaaacagcaaatgtgtt      |
| GNAI1_MIP_5   | gttgaagatagacttggtagCCTCAGCTTCCCGATATCCGACGGTAGTGTtttttccctttgtctca    |
| GNAI1_MIP_6   | ccactgtttgtattgttacaCCTCAGCTTCCCGATATCCGACGGTAGTGTtcttttaccatcaggt     |
| GNAI1_MIP_7   | gtgaaagatagtggtgtacaCCTCAGCTTCCCGATATCCGACGGTAGTGTgacatcctttttac       |
| GNAI1_MIP_8   | ccagctagcacaagagttgCCTCAGCTTCCCGATATCCGACGGTAGTGTacttactatgctcagaatc   |
| GNAI1_MIP_9   | acattctgtacaacttaggataCCTCAGCTTCCCGATATCCGACGGTAGTGTcccagagtagcagct    |
| GNAI1_MIP_10  | gagtgaactacaggaattgtCCTCAGCTTCCCGATATCCGACGGTAGTGTggatgctttattggct     |
| GNAI1_MIP_11  | gttctgagaacatctgttagCCTCAGCTTCCCGATATCCGACGGTAGTGTtacctttttattctaa     |
| GNAI1_MIP_12  | ggttctagctgaagatgaagaCCTCAGCTTCCCGATATCCGACGGTAGTGTgttaactcattctctc    |
| GNAI1_MIP_13  | gtcactcagtgctacagaCCTCAGCTTCCCGATATCCGACGGTAGTGTcctgactttcaaatgtta     |
| GNAI1_MIP_14  | gaaaaaatcaaaaagagcccCCTCAGCTTCCCGATATCCGACGGTAGTGTgattgtttttttttct     |
| GNAI1_MIP_15  | ccactgtttacatagctgCCTCAGCTTCCCGATATCCGACGGTAGTGTgacaagttattccagga      |
| GNAI1_MIP_16  | actcactgtgccacagatCCTCAGCTTCCCGATATCCGACGGTAGTGTtaacttttgcatttatgt     |
| GNAI1_MIP_17  | ggtgtatattccttgtgtcCCTCAGCTTCCCGATATCCGACGGTAGTGTaaaatgactttaccatga    |
| SEMA3A_MIP_1  | ccttggccaggtttttctgCCTCAGCTTCCCGATATCCGACGGTAGTGTgaggttctagagtaagt     |



|               |                                                                         |
|---------------|-------------------------------------------------------------------------|
| SEMA3A_MIP_2  | caggacataccccagggaacagCTTCAGCTTCCCGATATCCGACGGTAGTGTtagcatgacacctagccag |
| SEMA3A_MIP_3  | gggttaccttaagaagagtttgCTTCAGCTTCCCGATATCCGACGGTAGTGTtgcataagctctctgtac  |
| SEMA3A_MIP_4  | ggaagtcattgacacagagcaCTTCAGCTTCCCGATATCCGACGGTAGTGTtagagtgatgatcatatca  |
| SEMA3A_MIP_5  | attatgtgtgaggcacattttaCTTCAGCTTCCCGATATCCGACGGTAGTGTagaagcgcttgatctgt   |
| SEMA3A_MIP_6  | attctctctcagggtctgtggcCTTCAGCTTCCCGATATCCGACGGTAGTGTcagtcagtttcatctctg  |
| SEMA3A_MIP_7  | gggttagagaatagtagcacatCTTCAGCTTCCCGATATCCGACGGTAGTGTcttctctctgaatttc    |
| SEMA3A_MIP_8  | ccttattttcccttctagaaCTTCAGCTTCCCGATATCCGACGGTAGTGTtagcaggttgaagaatgaa   |
| SEMA3A_MIP_9  | atcttcaacctgctaagaccCTTCAGCTTCCCGATATCCGACGGTAGTGTgaagggaaaaataaggata   |
| SEMA3A_MIP_10 | ccgtaaatatcacaccggtgCTTCAGCTTCCCGATATCCGACGGTAGTGTataactagcaaacatttcat  |
| SEMA3A_MIP_11 | aaagcgtgtgctgagttgCTTCAGCTTCCCGATATCCGACGGTAGTGTtaagagaaacaagagatttaa   |
| SEMA3A_MIP_12 | ggtcaattagaacaccagcCTTCAGCTTCCCGATATCCGACGGTAGTGTgaaacaccagaattaacaa    |
| SEMA3A_MIP_13 | cattatgtattaccattgaatCTTCAGCTTCCCGATATCCGACGGTAGTGTatggcagtgcttgatgta   |
| SEMA3A_MIP_14 | gtcccaacatcttgaagaaaCTTCAGCTTCCCGATATCCGACGGTAGTGTaagacgtacaactgaact    |
| SEMA3A_MIP_15 | gttcttaagtagttcaattctCTTCAGCTTCCCGATATCCGACGGTAGTGTtaaaaggaagaccgat     |
| SEMA3A_MIP_16 | cactattggcgattgttcaCTTCAGCTTCCCGATATCCGACGGTAGTGTtcggaaaaaagttttagc     |
| SEMA3A_MIP_17 | gaccgagtgatgcagaagatgCTTCAGCTTCCCGATATCCGACGGTAGTGTggaccttctgatgatgt    |
| SEMA3A_MIP_18 | cataattataaattataataaCTTCAGCTTCCCGATATCCGACGGTAGTGTctggatgacttctgtc     |
| SEMA3A_MIP_19 | gctatacatcacaccgctgCTTCAGCTTCCCGATATCCGACGGTAGTGTattttaaaccactaagctac   |
| SEMA3A_MIP_20 | gtgagaaagggtgtcttctgCTTCAGCTTCCCGATATCCGACGGTAGTGTtctaaagttaagaactcag   |
| SEMA3A_MIP_21 | gaatggcaaaagtctgaacaaatCTTCAGCTTCCCGATATCCGACGGTAGTGTggtagttaaaaagttact |
| SEMA3A_MIP_22 | gtaacttttaactaccttaCTTCAGCTTCCCGATATCCGACGGTAGTGTtctcagactttgccattcc    |
| SEMA3A_MIP_23 | gtcattctgaaagaagggaacCTTCAGCTTCCCGATATCCGACGGTAGTGTacataaacactgacttct   |
| SEMA3A_MIP_24 | gggggcacagaagtctgctCTTCAGCTTCCCGATATCCGACGGTAGTGTtaggaacttttaaacatg     |
| SEMA3A_MIP_25 | gtatacttctcatctcagCTTCAGCTTCCCGATATCCGACGGTAGTGTcaaaagctgtatgggaaaat    |
| SEMA3A_MIP_26 | ccgtgaaaatgcaatagatggagCTTCAGCTTCCCGATATCCGACGGTAGTGTaatggtatttttatta   |
| SEMA3A_MIP_27 | cagctgcagttccagatgCTTCAGCTTCCCGATATCCGACGGTAGTGTtacacatggtacatgtcta     |
| SEMA3A_MIP_28 | ggggcgagactttgctatctCTTCAGCTTCCCGATATCCGACGGTAGTGTcataaacatgaaacttgcac  |
| SEMA3A_MIP_29 | gtgagttctccagcttaaaaaCTTCAGCTTCCCGATATCCGACGGTAGTGTaagaacatacaactgcttt  |
| SEMA3A_MIP_30 | gaaaaacggcctgggaagagCTTCAGCTTCCCGATATCCGACGGTAGTGTacatgactcagactctc     |
| SEMA3A_MIP_31 | gcacattcttctgtaagacaaaCTTCAGCTTCCCGATATCCGACGGTAGTGTtttaaaaaagcagcgt    |
| SEMA3A_MIP_32 | cagactcactgtacgctgCTTCAGCTTCCCGATATCCGACGGTAGTGTacaaatctgtccagcatg      |
| SEMA3A_MIP_33 | cacacaatctaagacagagaaCTTCAGCTTCCCGATATCCGACGGTAGTGTgaaacacttttgcacca    |
| SEMA3A_MIP_34 | ccagaagagatgaatgcaagtCTTCAGCTTCCCGATATCCGACGGTAGTGTtgaactttcttacttca    |
| SEMA3A_MIP_35 | cgcttctcatcaaaaaggaaCTTCAGCTTCCCGATATCCGACGGTAGTGTtatctataacttgagatgc   |
| SEMA3A_MIP_36 | gctgtatgtggagcaaggCTTCAGCTTCCCGATATCCGACGGTAGTGTtctcacataataaccaatg     |
| SEMA3A_MIP_37 | ccatgctgcagacgctgagCTTCAGCTTCCCGATATCCGACGGTAGTGTaaataaaagaaaaataagat   |
| SEMA3A_MIP_38 | ggattgtctgttttctggCTTCAGCTTCCCGATATCCGACGGTAGTGTatgaaactgacctaataca     |
| ADAM22_MIP_1  | gtaagttagccgtcctctgtgctCTTCAGCTTCCCGATATCCGACGGTAGTGTgaggagctgagcgtct   |
| ADAM22_MIP_2  | caggctcccagacacagagcagCTTCAGCTTCCCGATATCCGACGGTAGTGTgcccactcgggaaatgg   |
| ADAM22_MIP_3  | cctcatctaccgctcgggctCTTCAGCTTCCCGATATCCGACGGTAGTGTggtcattattttcgctttt   |
| ADAM22_MIP_4  | gaagcggtttctctctctctCTTCAGCTTCCCGATATCCGACGGTAGTGTgaccgacgtctcacct      |
| ADAM22_MIP_5  | agttgggtcccagtcgagtcagCTTCAGCTTCCCGATATCCGACGGTAGTGTggcgacctcggctggcc   |
| ADAM22_MIP_6  | gtgtgagttgacactgcttCTTCAGCTTCCCGATATCCGACGGTAGTGTgattagtagtgctgagtaa    |
| ADAM22_MIP_7  | aaggttatttatactcagccatCTTCAGCTTCCCGATATCCGACGGTAGTGTtctgacaaaagcaagtg   |
| ADAM22_MIP_8  | atttcctactgtgggaaaCTTCAGCTTCCCGATATCCGACGGTAGTGTcgtgttttcatctttggg      |
| ADAM22_MIP_9  | atcccaaaaatgtaaacacgaaCTTCAGCTTCCCGATATCCGACGGTAGTGTtcccacaagtaggaaa    |
| ADAM22_MIP_10 | acttcagtaagttcaaaaagtCTTCAGCTTCCCGATATCCGACGGTAGTGTtagctgattctctctgtg   |
| ADAM22_MIP_11 | ggcatgtgacaatgcaacaCTTCAGCTTCCCGATATCCGACGGTAGTGTtccatccaactttaaagtc    |
| ADAM22_MIP_12 | aaatgtttatgctgagagcttCTTCAGCTTCCCGATATCCGACGGTAGTGTggccatgcttaattattt   |
| ADAM22_MIP_13 | aaaaaataataggcatggccaCTTCAGCTTCCCGATATCCGACGGTAGTGTaagctctcagcataaaca   |
| ADAM22_MIP_14 | catctggtatgatgtcatatagCTTCAGCTTCCCGATATCCGACGGTAGTGTtttgcttaaggctgga    |
| ADAM22_MIP_15 | caaacagctggattgttaaacCTTCAGCTTCCCGATATCCGACGGTAGTGTcagatgtgggctaagat    |
| ADAM22_MIP_16 | cagtggtgtgctgttattCTTCAGCTTCCCGATATCCGACGGTAGTGTagaactctgacaaatgcac     |
| ADAM22_MIP_17 | gtgcattgtcagattcttcaatCTTCAGCTTCCCGATATCCGACGGTAGTGTacacgacacaccactg    |
| ADAM22_MIP_18 | cctagggtaaaactggtgagCTTCAGCTTCCCGATATCCGACGGTAGTGTgtttccttctctgtgta     |
| ADAM22_MIP_19 | acacaggaaggaacagcacctCTTCAGCTTCCCGATATCCGACGGTAGTGTcagttttaccctaggca    |
| ADAM22_MIP_20 | gccctagaagattcttattccCTTCAGCTTCCCGATATCCGACGGTAGTGTgaagaccttctactgtt    |
| ADAM22_MIP_21 | aacaagtgaaggtcttcaaaCTTCAGCTTCCCGATATCCGACGGTAGTGTaataagaactcttagggc    |
| ADAM22_MIP_22 | accctacgtgagttatgaaatCTTCAGCTTCCCGATATCCGACGGTAGTGTacacagctgattgttcat   |
| ADAM22_MIP_23 | gtcggcagggtttccatagcCTTCAGCTTCCCGATATCCGACGGTAGTGTacatcattacagaagttac   |
| ADAM22_MIP_24 | agtaggtgtaacatctgtacaCTTCAGCTTCCCGATATCCGACGGTAGTGTgttgaactgtgaacagt    |
| ADAM22_MIP_25 | cattcacgctctctcttctCTTCAGCTTCCCGATATCCGACGGTAGTGTcaccatactgatttgaata    |
| ADAM22_MIP_26 | gaaagttagcaagtggaagttCTTCAGCTTCCCGATATCCGACGGTAGTGTtctcagtgacaatttgg    |
| ADAM22_MIP_27 | gggtaatgactgggcaagtCTTCAGCTTCCCGATATCCGACGGTAGTGTaagcaactaaataaaaaat    |
| ADAM22_MIP_28 | gctgtgctgttctcttagCTTCAGCTTCCCGATATCCGACGGTAGTGTtcttaacaaggcatggtg      |

|               |                                                                        |
|---------------|------------------------------------------------------------------------|
| ADAM22_MIP_29 | cacatgcttgttataaagtgaCTTCAGCTTCCCGATATCCGACGGTAGTGTagaagacaacagcacagc  |
| ADAM22_MIP_30 | accttctaaggtaataagtgtggCTTCAGCTTCCCGATATCCGACGGTAGTGTgagttgaaccagcta   |
| ADAM22_MIP_31 | gttgaaaaggcaggcaccacCTTCAGCTTCCCGATATCCGACGGTAGTGTatgtacatacagggcaagt  |
| ADAM22_MIP_32 | gtaattcagggtcattccaggCTTCAGCTTCCCGATATCCGACGGTAGTGTgttcacttttggttttcc  |
| ADAM22_MIP_33 | gaggaaaaccaaagtgaactCTTCAGCTTCCCGATATCCGACGGTAGTGTctggaaatgacctgaatt   |
| ADAM22_MIP_34 | gctgtaaaaagtcaaggtaaaCTTCAGCTTCCCGATATCCGACGGTAGTGTtttcaggaaagtgcacc   |
| ADAM22_MIP_35 | caacactctgctctcaaggCTTCAGCTTCCCGATATCCGACGGTAGTGTcccagccttaatgattaa    |
| ADAM22_MIP_36 | acttatgggaaaaagtggggCTTCAGCTTCCCGATATCCGACGGTAGTGTcaagttgattttgtcat    |
| ADAM22_MIP_37 | aatgaacaaaatcaactgtgCTTCAGCTTCCCGATATCCGACGGTAGTGTcccacttttcccataag    |
| ADAM22_MIP_38 | cagcatgaaaggaatactgaaaCTTCAGCTTCCCGATATCCGACGGTAGTGTttgcactgactttcattc |
| ADAM22_MIP_39 | aaatgcagtcaaaaataaggcCTTCAGCTTCCCGATATCCGACGGTAGTGTcctttcatgctggtaca   |
| ADAM22_MIP_40 | gtcaggcggacttctcaaggCTTCAGCTTCCCGATATCCGACGGTAGTGTtcaatgggtatttgcctttc |
| ADAM22_MIP_41 | ggaaaagcaaataccattagcgaCTTCAGCTTCCCGATATCCGACGGTAGTGTgagaagtcgcctga    |
| ADAM22_MIP_42 | aggtggagacgtcagcccagCTTCAGCTTCCCGATATCCGACGGTAGTGTtagaaaattttttctgctt  |
| ADAM22_MIP_43 | ggcagaaaaaattttctatcagCTTCAGCTTCCCGATATCCGACGGTAGTGTgctgagcttccacctc   |
| ADAM22_MIP_44 | gtcgagcaaggaagaacattCTTCAGCTTCCCGATATCCGACGGTAGTGTtatatttgggaaaagaagta |
| ADAM22_MIP_45 | caccatcgagtttccaagcCTTCAGCTTCCCGATATCCGACGGTAGTGTtaattgaaaacggaaggaa   |
| ADAM22_MIP_46 | cctgtgcttcttcaacttCTTCAGCTTCCCGATATCCGACGGTAGTGTgattcatttttgcctca      |
| ADAM22_MIP_47 | agacacctgttctaagcacaCTTCAGCTTCCCGATATCCGACGGTAGTGTggtcctgtctattctgt    |
| ADAM22_MIP_48 | ggtatcaactgtctgcaaaCTTCAGCTTCCCGATATCCGACGGTAGTGTgagagttgactttactcta   |
| ADAM22_MIP_49 | atcagaaccttccagtgtctCTTCAGCTTCCCGATATCCGACGGTAGTGTaaagtttccagagagcag   |
| ADAM22_MIP_50 | ggaataactcgtggggttaCTTCAGCTTCCCGATATCCGACGGTAGTGTacaataaagtttctgaaagg  |
| ADAM22_MIP_51 | ccagcactaaaatggtgccaCTTCAGCTTCCCGATATCCGACGGTAGTGTtattcaaccaatgatacaaa |
| ADAM22_MIP_52 | gactcatattagcattgtggaaCTTCAGCTTCCCGATATCCGACGGTAGTGTcctctgatgtccttcc   |
| ADAM22_MIP_53 | ggaaggacatcaagaggagCTTCAGCTTCCCGATATCCGACGGTAGTGTcaacaatgctaataatgagtc |
| ADAM22_MIP_54 | gtctgctttctgtcgactCTTCAGCTTCCCGATATCCGACGGTAGTGTtctgaaagtttatattgccc   |
| ADAM22_MIP_55 | aactagatgctgagttgtgcCTTCAGCTTCCCGATATCCGACGGTAGTGTaaacattcaagaagaagg   |
| ADAM22_MIP_56 | actcttgcaaggtagagcCTTCAGCTTCCCGATATCCGACGGTAGTGTttggttacattttgaacaa    |
| ADAM22_MIP_57 | cgaggtgccattttcacagCTTCAGCTTCCCGATATCCGACGGTAGTGTtctgtggagaagagccta    |
| ADAM22_MIP_58 | cctgtgcaaatagtgcaaaagCTTCAGCTTCCCGATATCCGACGGTAGTGTctagctcaaacctgctt   |
| ADAM22_MIP_59 | aaaagacggttagagctagaCTTCAGCTTCCCGATATCCGACGGTAGTGTttttgacactatttgaca   |
| ADAM22_MIP_60 | aaacactgaaggaccatacttCTTCAGCTTCCCGATATCCGACGGTAGTGTtctgtctgtattttcag   |
| ADAM22_MIP_61 | gtctctttgaacctgggttCTTCAGCTTCCCGATATCCGACGGTAGTGTccagtcacactacagtat    |
| ADAM22_MIP_62 | cgacaagtgcagggtatgCTTCAGCTTCCCGATATCCGACGGTAGTGTaattcatgttccaactct     |
| ADAM22_MIP_63 | gtcctcatcaggaagtggagcCTTCAGCTTCCCGATATCCGACGGTAGTGTtaggaacaaggaggaa    |
| ADAM22_MIP_64 | gtcttccagaaatacgaagacCTTCAGCTTCCCGATATCCGACGGTAGTGTtctcttttctgtgtg     |
| ADAM22_MIP_65 | cacaacgaaaagagcaaaattCTTCAGCTTCCCGATATCCGACGGTAGTGTtctgattgtcgaagagc   |
| DLGAP2_MIP_1  | cgacgcgcccgcctactctCTTCAGCTTCCCGATATCCGACGGTAGTGTgagcctactgcgccg       |
| DLGAP2_MIP_2  | gcccgtggtcaggtgctcagCTTCAGCTTCCCGATATCCGACGGTAGTGTacacgtggtcggcagc     |
| DLGAP2_MIP_3  | cccggccaacctgctggaccCTTCAGCTTCCCGATATCCGACGGTAGTGTgtgctgtagtgccgggtg   |
| DLGAP2_MIP_4  | gcgtgtcgtagtgcagctgtaCTTCAGCTTCCCGATATCCGACGGTAGTGTgagctcctctgactgc    |
| DLGAP2_MIP_5  | gctcttcaccaagtgcactcCTTCAGCTTCCCGATATCCGACGGTAGTGTtagtgcagaagcagctgc   |
| DLGAP2_MIP_6  | cacggagtgtaccaggtggcggCTTCAGCTTCCCGATATCCGACGGTAGTGTtctgtcctctgtctgt   |
| DLGAP2_MIP_7  | cgcccagctgctcaaccggCTTCAGCTTCCCGATATCCGACGGTAGTGTaccagcccaccgccaag     |
| DLGAP2_MIP_8  | gataggtgctgctgctcaggCTTCAGCTTCCCGATATCCGACGGTAGTGTcggagcactgacgtcg     |
| DLGAP2_MIP_9  | caagagctgctgaacctggaCTTCAGCTTCCCGATATCCGACGGTAGTGTaaacctccaaggaacaa    |
| DLGAP2_MIP_10 | accaggagctgcctcaggaCTTCAGCTTCCCGATATCCGACGGTAGTGTgtagcctgcttaccctg     |
| DLGAP2_MIP_11 | actgcatacatttagttgtgcCTTCAGCTTCCCGATATCCGACGGTAGTGTaccaggaaccgaagcc    |
| DLGAP2_MIP_12 | gagttacattaagccatggggCTTCAGCTTCCCGATATCCGACGGTAGTGTgcccgttctcagtgaca   |
| DLGAP2_MIP_13 | acttctcattctctcagggaaCTTCAGCTTCCCGATATCCGACGGTAGTGTctccaagcgtctct      |
| DLGAP2_MIP_14 | cactgctgcgagctccctctCTTCAGCTTCCCGATATCCGACGGTAGTGTactccagcccaagacatc   |
| DLGAP2_MIP_15 | attccgctcccgaaccagaCTTCAGCTTCCCGATATCCGACGGTAGTGTgcccctgcagcgggtctca   |
| DLGAP2_MIP_16 | ggggtccagctgtgtccacaCTTCAGCTTCCCGATATCCGACGGTAGTGTactggaccggggagaa     |
| DLGAP2_MIP_17 | gatgtttccaacaaggagtcaCTTCAGCTTCCCGATATCCGACGGTAGTGTggggcatcacgtgtgc    |
| DLGAP2_MIP_18 | aggcatccatggcctgagatCTTCAGCTTCCCGATATCCGACGGTAGTGTctgttgacctgatggtga   |
| DLGAP2_MIP_19 | cagtacaatgtactctcagcCTTCAGCTTCCCGATATCCGACGGTAGTGTgacacctctgacatcac    |
| DLGAP2_MIP_20 | accaggagcctaccaggaCTTCAGCTTCCCGATATCCGACGGTAGTGTcctgttgacttgggactttc   |
| DLGAP2_MIP_21 | gagatcagaggcttggaggtgCTTCAGCTTCCCGATATCCGACGGTAGTGTctgttctgtccagct     |
| DLGAP2_MIP_22 | cctgggtccaaggcggaggagCTTCAGCTTCCCGATATCCGACGGTAGTGTgcccctctacaactcca   |
| DLGAP2_MIP_23 | ggccttctgctggtccgcaCTTCAGCTTCCCGATATCCGACGGTAGTGTttttgcttattctaggct    |
| DLGAP2_MIP_24 | cctttttggatgtcatcgacCTTCAGCTTCCCGATATCCGACGGTAGTGTgtctccacactgtggct    |
| DLGAP2_MIP_25 | atgaagccacagtgtgagaccCTTCAGCTTCCCGATATCCGACGGTAGTGTtccatgaaatccaaaa    |
| DLGAP2_MIP_26 | actcagcccctctgacagcCTTCAGCTTCCCGATATCCGACGGTAGTGTcccattgttcagttcaaaa   |
| DLGAP2_MIP_27 | gcttctcatctccaactgctcaccCTTCAGCTTCCCGATATCCGACGGTAGTGTaaactatggcctgtt  |
| DLGAP2_MIP_28 | ccttcagttcgctcatcttctCTTCAGCTTCCCGATATCCGACGGTAGTGTaccatctgtcttctctc   |

|                |                                                                        |
|----------------|------------------------------------------------------------------------|
| DLGAP2_MIP_29  | gtggtgatgtggcctgggaacCTTCAGCTTCCCGATATCCGACGGTAGTGTgggtccgatagtcttctct |
| DLGAP2_MIP_30  | gatggctcgtggttttgaagctgCTTCAGCTTCCCGATATCCGACGGTAGTGTagggctcttcagcta   |
| DLGAP2_MIP_31  | acggagacatctcccagtctCTTCAGCTTCCCGATATCCGACGGTAGTGTgaagcctgagcttctact   |
| DLGAP2_MIP_32  | ctcccttggattcaagtgaCTTCAGCTTCCCGATATCCGACGGTAGTGTtagtgagagagagggcg     |
| DLGAP2_MIP_33  | gtttattggcttggcaacaCTTCAGCTTCCCGATATCCGACGGTAGTGTctgctttgtgttaattgac   |
| DLGAP2_MIP_34  | gctggaattctgggacatgagCTTCAGCTTCCCGATATCCGACGGTAGTGTcagatgggaactcttgac  |
| DLGAP2_MIP_35  | gtcagcatgaagtcgacgagctCTTCAGCTTCCCGATATCCGACGGTAGTGTgtgccccagggagact   |
| DLGAP2_MIP_36  | caatggagagctgcagcatgctCTTCAGCTTCCCGATATCCGACGGTAGTGTcagtgagaaaagggggtt |
| DLGAP2_MIP_37  | agagaaaaatccctggacctgccCTTCAGCTTCCCGATATCCGACGGTAGTGTgagctcgcgagctgct  |
| DLGAP2_MIP_38  | ggattggaggcgggaccttctCTTCAGCTTCCCGATATCCGACGGTAGTGTggaattctccggaagga   |
| DLGAP2_MIP_39  | ccctcgtcctccgcttctCTTCAGCTTCCCGATATCCGACGGTAGTGTcggagcgcctcatggccg     |
| SMARCA2_MIP_1  | catccccaggttccgccacaCTTCAGCTTCCCGATATCCGACGGTAGTGTtactgactggcagagacag  |
| SMARCA2_MIP_2  | cctgctcctggactaggcccCTTCAGCTTCCCGATATCCGACGGTAGTGTactcttacctatgcttctg  |
| SMARCA2_MIP_3  | atcatgcaaatctttgcttctaCTTCAGCTTCCCGATATCCGACGGTAGTGTccacaggaaggcatgc   |
| SMARCA2_MIP_4  | ctccccagagccaatggaCTTCAGCTTCCCGATATCCGACGGTAGTGTtagaggtgtctaactaatgt   |
| SMARCA2_MIP_5  | cccatgctgggtgaggtggCTTCAGCTTCCCGATATCCGACGGTAGTGTtagacattcttggaaatt    |
| SMARCA2_MIP_6  | cacctcagatgccaccaagccCTTCAGCTTCCCGATATCCGACGGTAGTGTtctttcaggggtgtcaggg |
| SMARCA2_MIP_7  | agttgggctcctccagacataCTTCAGCTTCCCGATATCCGACGGTAGTGTctaaaatctgagctcga   |
| SMARCA2_MIP_8  | aaggacgttctgctgcttctCTTCAGCTTCCCGATATCCGACGGTAGTGTgcccacagaggtccct     |
| SMARCA2_MIP_9  | ggactgcaagctgcagcttctCTTCAGCTTCCCGATATCCGACGGTAGTGTgctcgtctgtgtgtgc    |
| SMARCA2_MIP_10 | caactcggatacaaaagactctCTTCAGCTTCCCGATATCCGACGGTAGTGTgagcagcaacagcagcc  |
| SMARCA2_MIP_11 | cgcagtgcccgggcccctcagCTTCAGCTTCCCGATATCCGACGGTAGTGTcctatgctcttcttccg   |
| SMARCA2_MIP_12 | ccgcccggcctgctcggctcggCTTCAGCTTCCCGATATCCGACGGTAGTGTaatttccaggggtcc    |
| SMARCA2_MIP_13 | cctgctccttggttggcaaaaCTTCAGCTTCCCGATATCCGACGGTAGTGTatccagaaaaccgaagcc  |
| SMARCA2_MIP_14 | cggttactcaatttccagcctCTTCAGCTTCCCGATATCCGACGGTAGTGTcctttccccattttattgt |
| SMARCA2_MIP_15 | cggttgccttggcttctaaatCTTCAGCTTCCCGATATCCGACGGTAGTGTattgaatagactaaaggca |
| SMARCA2_MIP_16 | catgaccgagaagctggagaagCTTCAGCTTCCCGATATCCGACGGTAGTGTtctaactgctctctctt  |
| SMARCA2_MIP_17 | gagcttctcagagcttggCTTCAGCTTCCCGATATCCGACGGTAGTGTattttagaattcattggac    |
| SMARCA2_MIP_18 | catgccaactgaaagagagCTTCAGCTTCCCGATATCCGACGGTAGTGTtcttttcttcttcttctt    |
| SMARCA2_MIP_19 | cggccacagaccgatgatctCTTCAGCTTCCCGATATCCGACGGTAGTGTtctgaggaggttctct     |
| SMARCA2_MIP_20 | gtttgggagcacaagcaagcCTTCAGCTTCCCGATATCCGACGGTAGTGTatcctgctcttcttcttct  |
| SMARCA2_MIP_21 | cagattggctacatactcatgCTTCAGCTTCCCGATATCCGACGGTAGTGTaaaaacttatccctgcc   |
| SMARCA2_MIP_22 | gtctgtccatactggcagCTTCAGCTTCCCGATATCCGACGGTAGTGTgtgtacttataacattcga    |
| SMARCA2_MIP_23 | acaatgcaatgttataagtaacCTTCAGCTTCCCGATATCCGACGGTAGTGTgctgcccaggtatggc   |
| SMARCA2_MIP_24 | aagcaagtcaagtgagcctCTTCAGCTTCCCGATATCCGACGGTAGTGTtctaacatgaaaccgtgac   |
| SMARCA2_MIP_25 | ggtcgaacagaacctgccCTTCAGCTTCCCGATATCCGACGGTAGTGTagttttagtttcagatcgt    |
| SMARCA2_MIP_26 | aggaaagaaattcttctgaatgCTTCAGCTTCCCGATATCCGACGGTAGTGTctcttctcactcttct   |
| SMARCA2_MIP_27 | ggaaaaagagtgggaagaggCTTCAGCTTCCCGATATCCGACGGTAGTGTcattcaggaagaattctt   |
| SMARCA2_MIP_28 | ccaatagcgaagaagtctCTTCAGCTTCCCGATATCCGACGGTAGTGTgtctttcagaaaaatgca     |
| SMARCA2_MIP_29 | cggtttctgctactggacCTTCAGCTTCCCGATATCCGACGGTAGTGTaaaaaaaattcattaagca    |
| SMARCA2_MIP_30 | gtctgccctctaattaatggCTTCAGCTTCCCGATATCCGACGGTAGTGTtctccacttttcttctt    |
| SMARCA2_MIP_31 | gtttctccacctctccgagaCTTCAGCTTCCCGATATCCGACGGTAGTGTtagcccttagtcaacatgtg |
| SMARCA2_MIP_32 | atggggttggaaagaccatCTTCAGCTTCCCGATATCCGACGGTAGTGTgggtgtattaggaatt      |
| SMARCA2_MIP_33 | catcggctaagattccgttctCTTCAGCTTCCCGATATCCGACGGTAGTGTacgatgactgtggaataat |
| SMARCA2_MIP_34 | aaaagcaaaaaatagacctCTTCAGCTTCCCGATATCCGACGGTAGTGTtttttctgtgttttttt     |
| SMARCA2_MIP_35 | aaaaaaaaacaagaaaaaCTTCAGCTTCCCGATATCCGACGGTAGTGTagggtctatttttgccttt    |
| SMARCA2_MIP_36 | cattctgcaaggtatgttttCTTCAGCTTCCCGATATCCGACGGTAGTGTgatcatgcatgtattttt   |
| SMARCA2_MIP_37 | caagaggacattgaattgccCTTCAGCTTCCCGATATCCGACGGTAGTGTtcaattacactcagact    |
| SMARCA2_MIP_38 | actatgtggccccagaaggaCTTCAGCTTCCCGATATCCGACGGTAGTGTgtattttccctgcttac    |
| SMARCA2_MIP_39 | agtgtcaagacctgagtcagcCTTCAGCTTCCCGATATCCGACGGTAGTGTaccattgttcaaatgtc   |
| SMARCA2_MIP_40 | gccctaaagctgagaacattaCTTCAGCTTCCCGATATCCGACGGTAGTGTtctcccaacaatttttaa  |
| SMARCA2_MIP_41 | cccgaaaaagtattgtcacCTTCAGCTTCCCGATATCCGACGGTAGTGTcaaatcataataagcctct   |
| SMARCA2_MIP_42 | ggtcttaacacctatgtagacCTTCAGCTTCCCGATATCCGACGGTAGTGTcaattcagaggcaggt    |
| SMARCA2_MIP_43 | gaaagataagaaggtacgttctCTTCAGCTTCCCGATATCCGACGGTAGTGTctgcttctgctacttac  |
| SMARCA2_MIP_44 | atccccctggctgcatatggcCTTCAGCTTCCCGATATCCGACGGTAGTGTcagcattagcaggatgc   |
| SMARCA2_MIP_45 | gtttgagcctgattgtgtaCTTCAGCTTCCCGATATCCGACGGTAGTGTatttttcccttccactg     |
| SMARCA2_MIP_46 | cagtggaaagggaaaaatagaaCTTCAGCTTCCCGATATCCGACGGTAGTGTcaaatcaggtcctcaaac |
| SMARCA2_MIP_47 | gtgtgtgcttacataaactCTTCAGCTTCCCGATATCCGACGGTAGTGTtaataataactatttttaa   |
| SMARCA2_MIP_48 | gattttaaaaaatgtaattatCTTCAGCTTCCCGATATCCGACGGTAGTGTgagttatgtaaggccaac  |
| SMARCA2_MIP_49 | catctctcatgacctatggCTTCAGCTTCCCGATATCCGACGGTAGTGTtcttctgtttttgctattt   |
| SMARCA2_MIP_50 | catctggcagaaaagcagcaCTTCAGCTTCCCGATATCCGACGGTAGTGTtaagtccccattacccttc  |
| SMARCA2_MIP_51 | gcttaaatcttcagcagctCTTCAGCTTCCCGATATCCGACGGTAGTGTttggcaaatattttctg     |
| SMARCA2_MIP_52 | caggccaccagctctgtgctCTTCAGCTTCCCGATATCCGACGGTAGTGTaatgaaactgatcatctt   |
| SMARCA2_MIP_53 | caaaatacaagctgaactggaCTTCAGCTTCCCGATATCCGACGGTAGTGTatagcatattgaccccc   |
| SMARCA2_MIP_54 | gttcaggtacagagcctgactCTTCAGCTTCCCGATATCCGACGGTAGTGTcaagatggcctcagga    |

|                |                                                                        |
|----------------|------------------------------------------------------------------------|
| SMARCA2_MIP_55 | ccctttgttaaaaaactctggCTTCAGCTTCCCGATATCCGACGGTAGTGTcaagccacgagcggag    |
| SMARCA2_MIP_56 | gctttatacctctgcccttCTTCAGCTTCCCGATATCCGACGGTAGTGTaaactcactctgttttaacc  |
| SMARCA2_MIP_57 | gatttaaccagtgagcactCTTCAGCTTCCCGATATCCGACGGTAGTGTaagcatttgttcatgat     |
| SMARCA2_MIP_58 | gtagaaaggctcacctgtgaCTTCAGCTTCCCGATATCCGACGGTAGTGTgacctcttattaatgtct   |
| SMARCA2_MIP_59 | cctcctcattaaaggggcttCTTCAGCTTCCCGATATCCGACGGTAGTGTgtagggcgtcactgtag    |
| SMARCA2_MIP_60 | gagaaaccaggggcttagagcCTTCAGCTTCCCGATATCCGACGGTAGTGTaatattggggaggggttc  |
| SMARCA2_MIP_61 | ctaagaagagaagaggccctCTTCAGCTTCCCGATATCCGACGGTAGTGTctcctttgttccaacgaa   |
| SMARCA2_MIP_62 | caatttctctcttttctgCTTCAGCTTCCCGATATCCGACGGTAGTGTttatcacgatcatgatga     |
| SMARCA2_MIP_63 | gttaagtgtgacttaggttCTTCAGCTTCCCGATATCCGACGGTAGTGTaaactgacaaagcagatg    |
| SMARCA2_MIP_64 | ccctatctctaaatacagctatccCTTCAGCTTCCCGATATCCGACGGTAGTGTggggacgagaaccag  |
| SMARCA2_MIP_65 | ccctatctctaaatacaggtatccCTTCAGCTTCCCGATATCCGACGGTAGTGTggggacgagaaccag  |
| SMARCA2_MIP_66 | cggtagagtagaagaacactagCTTCAGCTTCCCGATATCCGACGGTAGTGTatgattcaatctgttc   |
| SMARCA2_MIP_67 | ggaagccagtggtattcaaaaCTTCAGCTTCCCGATATCCGACGGTAGTGTtctcctcagtaattgtgat |
| SMARCA2_MIP_68 | catagtattctgtaattcttccCTTCAGCTTCCCGATATCCGACGGTAGTGTggcggctcagctcaa    |
| SMARCA2_MIP_69 | cagacgttcaactggaggggaCTTCAGCTTCCCGATATCCGACGGTAGTGTtgcgtgaatttctcctcc  |
| SMARCA2_MIP_70 | acatccttccaggtgcctaCTTCAGCTTCCCGATATCCGACGGTAGTGTtagaaaatgaaatattct    |
| SMARCA2_MIP_71 | aagatgaagaagagtcagatcCTTCAGCTTCCCGATATCCGACGGTAGTGTacagatgcccccttgacc  |
| SMARCA2_MIP_72 | attgcttctcctcactctcCTTCAGCTTCCCGATATCCGACGGTAGTGTtctaaagtcttcttctga    |
| SMARCA2_MIP_73 | gccaacctgtagtgagcgaCTTCAGCTTCCCGATATCCGACGGTAGTGTgattactcactgtgtctat   |
| SMARCA2_MIP_74 | cctcgatttggcctttcttctgCTTCAGCTTCCCGATATCCGACGGTAGTGTggggacgagaaccag    |
| SMARCA2_MIP_75 | gtctcatttctaccagttagCTTCAGCTTCCCGATATCCGACGGTAGTGTtcttctcagtgatgtact   |
| SMARCA2_MIP_76 | atgaagtaacatcacatgcaagCTTCAGCTTCCCGATATCCGACGGTAGTGTactcactgggtagaatg  |
| SLC1A1_MIP_1   | ggcgatcgcgaccctcaagCTTCAGCTTCCCGATATCCGACGGTAGTGTcgacaatagcggcgaca     |
| SLC1A1_MIP_2   | gtcggctatttgcgctggCTTCAGCTTCCCGATATCCGACGGTAGTGTagggtcgcgcatcggcca     |
| SLC1A1_MIP_3   | aaattcaatgaggtatgctgaCTTCAGCTTCCCGATATCCGACGGTAGTGTaggagaactcaaatatgtt |
| SLC1A1_MIP_4   | agttgagaggttctgtgtCTTCAGCTTCCCGATATCCGACGGTAGTGTatggactaatagagaaca     |
| SLC1A1_MIP_5   | gtattatttctgaccactctcaCTTCAGCTTCCCGATATCCGACGGTAGTGTctgaggattaatcggc   |
| SLC1A1_MIP_6   | gtcagcaaacactgaaggCTTCAGCTTCCCGATATCCGACGGTAGTGTgaaaaaatcaccattacat    |
| SLC1A1_MIP_7   | catcaggtgagtttctccacaCTTCAGCTTCCCGATATCCGACGGTAGTGTgacgctgttcttggcca   |
| SLC1A1_MIP_8   | caggggtgctccttctcctCTTCAGCTTCCCGATATCCGACGGTAGTGTattcaatacagtaaacgca   |
| SLC1A1_MIP_9   | acttctacccttctccatCTTCAGCTTCCCGATATCCGACGGTAGTGTattaggtatgacaaaacaa    |
| SLC1A1_MIP_10  | aaggcagtattatgttagggcCTTCAGCTTCCCGATATCCGACGGTAGTGTcagcagaaaaaacattt   |
| SLC1A1_MIP_11  | acagctgtcatgacaactcCTTCAGCTTCCCGATATCCGACGGTAGTGTtctcaaaagcttaaaaaaa   |
| SLC1A1_MIP_12  | aaggactcttctgcatgtctCTTCAGCTTCCCGATATCCGACGGTAGTGTgctgattctgtaatga     |
| SLC1A1_MIP_13  | attggaaaaatgggagaaaaggCTTCAGCTTCCCGATATCCGACGGTAGTGTtctgctcaaatatgtt   |
| SLC1A1_MIP_14  | acaagtccaagacaaggcaaaCTTCAGCTTCCCGATATCCGACGGTAGTGTaggggaagcaaatgaca   |
| SLC1A1_MIP_15  | cctttacatggccacagctctCTTCAGCTTCCCGATATCCGACGGTAGTGTgagaagcacttgatgacg  |
| SLC1A1_MIP_16  | gatcttccagcaatcaggaacaaCTTCAGCTTCCCGATATCCGACGGTAGTGTtctctcagcggcatcc  |
| SLC1A1_MIP_17  | attgcatgggaatggcccaCTTCAGCTTCCCGATATCCGACGGTAGTGTaggataagtgtggggagg    |
| SLC1A1_MIP_18  | ggaaagggtcttctgtagCTTCAGCTTCCCGATATCCGACGGTAGTGTgctgtttgtaaaagtggg     |
| SLC1A1_MIP_19  | caacaatcaacatggatgggaCTTCAGCTTCCCGATATCCGACGGTAGTGTgacattctagacataagt  |
| SLC1A1_MIP_20  | atccttctgaccctgttatCTTCAGCTTCCCGATATCCGACGGTAGTGTgaggtgatgatctgccc     |
| SLC1A1_MIP_21  | gtgatgaattcttcttctgatctCTTCAGCTTCCCGATATCCGACGGTAGTGTgacctggactgggca   |
| SLC1A1_MIP_22  | gaggatgtcacctgatcattCTTCAGCTTCCCGATATCCGACGGTAGTGTgctaaactcttctctgct   |
| SLC1A1_MIP_23  | cccacggcactcagcacaatCTTCAGCTTCCCGATATCCGACGGTAGTGTagaatgatcacagactgacg |
| SLC1A1_MIP_24  | aacattgtgaatcccttgccttCTTCAGCTTCCCGATATCCGACGGTAGTGTctctccgtctctccc    |
| SLC1A1_MIP_25  | acttcagatgaaacatcatctgCTTCAGCTTCCCGATATCCGACGGTAGTGTgaggtctgggtgatga   |
| SLC1A1_MIP_26  | actaatggcgaagtgtacattCTTCAGCTTCCCGATATCCGACGGTAGTGTtagacaagtctgacacca  |
| SH3GL2_MIP_1   | gtggccttccggcggcagcCTTCAGCTTCCCGATATCCGACGGTAGTGTccggcagcggcctctctg    |
| SH3GL2_MIP_2   | gcaggagccgctgctgctgCTTCAGCTTCCCGATATCCGACGGTAGTGTctgcccggcggcggcagc    |
| SH3GL2_MIP_3   | gagatggaaagggttaagcctCTTCAGCTTCCCGATATCCGACGGTAGTGTaagtcttaaaattctaac  |
| SH3GL2_MIP_4   | agtcacatctagctgttctcCTTCAGCTTCCCGATATCCGACGGTAGTGTgatttctcagagaccag    |
| SH3GL2_MIP_5   | catcttataatgtaaaaggaCTTCAGCTTCCCGATATCCGACGGTAGTGTtctaaagctcatcttttg   |
| SH3GL2_MIP_6   | gttttgggtgagctgtatataCTTCAGCTTCCCGATATCCGACGGTAGTGTctgattgggtgaaag     |
| SH3GL2_MIP_7   | attggaagagagcttggagatCTTCAGCTTCCCGATATCCGACGGTAGTGTtctctctctcactt      |
| SH3GL2_MIP_8   | gcgctctgctgaggatagCTTCAGCTTCCCGATATCCGACGGTAGTGTctacagaatttctaccagc    |
| SH3GL2_MIP_9   | cagaactcattgacctcttCTTCAGCTTCCCGATATCCGACGGTAGTGTgagatgacatttctctt     |
| SH3GL2_MIP_10  | gtccaaagagcttctgacctcCTTCAGCTTCCCGATATCCGACGGTAGTGTaaaaggatctgactctgt  |
| SH3GL2_MIP_11  | agtctaaggaaattgctgagctCTTCAGCTTCCCGATATCCGACGGTAGTGTctgcttctgacttttg   |
| SH3GL2_MIP_12  | caaatctctagagctgacgCTTCAGCTTCCCGATATCCGACGGTAGTGTaagggttatggccttta     |
| SH3GL2_MIP_13  | gtattctacagttccctgactCTTCAGCTTCCCGATATCCGACGGTAGTGTggcatgatttccatca    |
| SH3GL2_MIP_14  | gatctggactgctgtgtgCTTCAGCTTCCCGATATCCGACGGTAGTGTgacgtttgtctccaaatg     |
| SH3GL2_MIP_15  | acaggcactccaaacctcaCTTCAGCTTCCCGATATCCGACGGTAGTGTaccacttttcttactg      |
| SH3GL2_MIP_16  | gggctgagtactgtctcagttCTTCAGCTTCCCGATATCCGACGGTAGTGTgaccagattggcacttc   |
| SH3GL2_MIP_17  | attgatgagaactggatgaggCTTCAGCTTCCCGATATCCGACGGTAGTGTtctctctgctctact     |

|               |                                                                        |
|---------------|------------------------------------------------------------------------|
| SH3GL2_MIP_18 | ggttagtgtgatgatcgCTTCAGCTTCCCGATATCCGACGGTAGTGTggccaagaggaggcgag       |
| STXBP1_MIP_1  | cagcgcccaggcctccgagcggCTTCAGCTTCCCGATATCCGACGGTAGTGTccggagagctcgcgagc  |
| STXBP1_MIP_2  | gctgcgcgagctccccggctcCTTCAGCTTCCCGATATCCGACGGTAGTGTctcggagcctggcgctg   |
| STXBP1_MIP_3  | gaaaaatcagaaggggatggaCTTCAGCTTCCCGATATCCGACGGTAGTGTtaattctctctctctct   |
| STXBP1_MIP_4  | aaagagagagagagagagaaatCTTCAGCTTCCCGATATCCGACGGTAGTGTactccatcccctctga   |
| STXBP1_MIP_5  | cacttgagcagtgctggagcctCTTCAGCTTCCCGATATCCGACGGTAGTGTgaagccatacagctgtt  |
| STXBP1_MIP_6  | cgtatgggcttcatggactctgCTTCAGCTTCCCGATATCCGACGGTAGTGTcactgctcaagtgcagag |
| STXBP1_MIP_7  | ccagaggaggactctggctaCTTCAGCTTCCCGATATCCGACGGTAGTGTccatcatgtttcttattca  |
| STXBP1_MIP_8  | acagtgaataagaaaacatgatggCTTCAGCTTCCCGATATCCGACGGTAGTGTtagccagagctctct  |
| STXBP1_MIP_9  | ctgtccccagtcctcagcCTTCAGCTTCCCGATATCCGACGGTAGTGTggattcaggtccctctttt    |
| STXBP1_MIP_10 | aaaagaggacctgaatccaattCTTCAGCTTCCCGATATCCGACGGTAGTGTgtagggactggggacag  |
| STXBP1_MIP_11 | cctgagtaggggtgcaagCTTCAGCTTCCCGATATCCGACGGTAGTGTactgcttttgcatacttg     |
| STXBP1_MIP_12 | caagtatgacaaaagacagttggcCTTCAGCTTCCCGATATCCGACGGTAGTGTgacccccactcagg   |
| STXBP1_MIP_13 | gtgccacctgaaggagctacCTTCAGCTTCCCGATATCCGACGGTAGTGTtaatacttttctctccc    |
| STXBP1_MIP_14 | ggcgctccagataggattctcCTTCAGCTTCCCGATATCCGACGGTAGTGTcaggccagctcctcact   |
| STXBP1_MIP_15 | gttctcttcaaggaccgagCTTCAGCTTCCCGATATCCGACGGTAGTGTctgacccccctttg        |
| STXBP1_MIP_16 | acaagagggggtgacagagcaCTTCAGCTTCCCGATATCCGACGGTAGTGTggtccttgtaaagagaa   |
| STXBP1_MIP_17 | gcctatgaaaatgatgatacaCTTCAGCTTCCCGATATCCGACGGTAGTGTgcatctccctgttttcc   |
| STXBP1_MIP_18 | gcctgaaaagtcaattcatggCTTCAGCTTCCCGATATCCGACGGTAGTGTcaaaccaaaaaaccggttc |
| STXBP1_MIP_19 | cagaggtgtccagtaagagccCTTCAGCTTCCCGATATCCGACGGTAGTGTcagtcactccactgag    |
| STXBP1_MIP_20 | gtgcttggcgcagtgctaCTTCAGCTTCCCGATATCCGACGGTAGTGTccaagaaaacgaattcacac   |
| STXBP1_MIP_21 | gcttctcttaagagcaggcCTTCAGCTTCCCGATATCCGACGGTAGTGTacttagctcctctttta     |
| STXBP1_MIP_22 | gaagataaaaggaggcagctaaCTTCAGCTTCCCGATATCCGACGGTAGTGTtccctgctcttagagag  |
| STXBP1_MIP_23 | cagctgcaaaaagacttctcaaCTTCAGCTTCCCGATATCCGACGGTAGTGTgctttctcttccctta   |
| STXBP1_MIP_24 | cactctaaggccctgatgtCTTCAGCTTCCCGATATCCGACGGTAGTGTactcaattattcaaacagat  |
| STXBP1_MIP_25 | gttttggccagcctattacCTTCAGCTTCCCGATATCCGACGGTAGTGTcaaacctgttggctttt     |
| STXBP1_MIP_26 | ggaaaaagcacaacagtttgtaCTTCAGCTTCCCGATATCCGACGGTAGTGTaaataggcctggcaaaa  |
| STXBP1_MIP_27 | gcatcatcttctctacatctCTTCAGCTTCCCGATATCCGACGGTAGTGTgccaatgaggtgtgttt    |
| STXBP1_MIP_28 | gacattggcactcagagaatCTTCAGCTTCCCGATATCCGACGGTAGTGTtctgtttctctcttct     |
| STXBP1_MIP_29 | atgtaagagccagctcagctCTTCAGCTTCCCGATATCCGACGGTAGTGTatccgggtcttctgtccc   |
| STXBP1_MIP_30 | cgaggtgagccatgttggtgatCTTCAGCTTCCCGATATCCGACGGTAGTGTctcttgactacgagtg   |
| STXBP1_MIP_31 | gtagtgctggggcacagggcCTTCAGCTTCCCGATATCCGACGGTAGTGTtcttaacctggtgtgtg    |
| STXBP1_MIP_32 | ccatgatgtccttgataatcggCTTCAGCTTCCCGATATCCGACGGTAGTGTcaaatcctcaaggagg   |
| STXBP1_MIP_33 | gacagaggggagcagctctCTTCAGCTTCCCGATATCCGACGGTAGTGTaatctgtctcttctctc     |
| STXBP1_MIP_34 | ggaaaagagacagatattagctCTTCAGCTTCCCGATATCCGACGGTAGTGTgctccctctgtcctt    |
| STXBP1_MIP_35 | atgagatgcgctgcctacCTTCAGCTTCCCGATATCCGACGGTAGTGTaaactgactgacattctctt   |
| STXBP1_MIP_36 | gctcacaccccaaggatgaaaCTTCAGCTTCCCGATATCCGACGGTAGTGTcaaacgctggaatggag   |
| STXBP1_MIP_37 | agagcaaaagaaaagaaataaaCTTCAGCTTCCCGATATCCGACGGTAGTGTggcctctgttctcca    |
| STXBP1_MIP_38 | gataccatagaggactcctCTTCAGCTTCCCGATATCCGACGGTAGTGTagaataaagaaaagagtg    |
| STXBP1_MIP_39 | caaaacacgccccatcccacCTTCAGCTTCCCGATATCCGACGGTAGTGTcaagctcactgtctctct   |
| STXBP1_MIP_40 | gagcttcccagttctgtttccCTTCAGCTTCCCGATATCCGACGGTAGTGTtttggaggggcagctt    |
| SPTAN1_MIP_1  | gtcagaagctggaagattcctCTTCAGCTTCCCGATATCCGACGGTAGTGTgacattttgatttcag    |
| SPTAN1_MIP_2  | gttagaggtccttgaagcggCTTCAGCTTCCCGATATCCGACGGTAGTGTggttgggtctttata      |
| SPTAN1_MIP_3  | aatcagacgaggaaagtactCTTCAGCTTCCCGATATCCGACGGTAGTGTggagaatggatcacagga   |
| SPTAN1_MIP_4  | catctgaaaccatacgggtgagctCTTCAGCTTCCCGATATCCGACGGTAGTGTactcaaggtccgcaa  |
| SPTAN1_MIP_5  | aaatgcccttctgatcatcCTTCAGCTTCCCGATATCCGACGGTAGTGTttaaagctgaaaagtc      |
| SPTAN1_MIP_6  | gtgaggactgtgagctggCTTCAGCTTCCCGATATCCGACGGTAGTGTaaactctgattgaaactt     |
| SPTAN1_MIP_7  | cgtaagtactgcaccaactctgCTTCAGCTTCCCGATATCCGACGGTAGTGTgtgctcaactggctc    |
| SPTAN1_MIP_8  | gagttaatgaagtgaaccagtttCTTCAGCTTCCCGATATCCGACGGTAGTGTgctcttattaggtcct  |
| SPTAN1_MIP_9  | catgagcagcatatctgttCTTCAGCTTCCCGATATCCGACGGTAGTGTgaccaatcatcaaaattta   |
| SPTAN1_MIP_10 | ctcttggggcagcagaagtCTTCAGCTTCCCGATATCCGACGGTAGTGTacaatccagctctct       |
| SPTAN1_MIP_11 | gccaggctgactgactcatcCTTCAGCTTCCCGATATCCGACGGTAGTGTtcacaactccccccag     |
| SPTAN1_MIP_12 | ggtctggagagagatcttctgCTTCAGCTTCCCGATATCCGACGGTAGTGTactggtgcttctgtctg   |
| SPTAN1_MIP_13 | ccgaagcagagcctgaacacCTTCAGCTTCCCGATATCCGACGGTAGTGTgcttggactagaatgaa    |
| SPTAN1_MIP_14 | gattacaactgggagcagatCTTCAGCTTCCCGATATCCGACGGTAGTGTgtaccaaggtcaggaga    |
| SPTAN1_MIP_15 | gttctctcgttacttgaCTTCAGCTTCCCGATATCCGACGGTAGTGTtattctcgttcaaaaaag      |
| SPTAN1_MIP_16 | cctgctagatagacaccaagaCTTCAGCTTCCCGATATCCGACGGTAGTGTgtcttcttggtttcc     |
| SPTAN1_MIP_17 | cacatcactggcaagctcatctCTTCAGCTTCCCGATATCCGACGGTAGTGTgccaactatagcctcac  |
| SPTAN1_MIP_18 | agaagagaaatggagcttttgaCTTCAGCTTCCCGATATCCGACGGTAGTGTggccttgttttctctc   |
| SPTAN1_MIP_19 | caggagaaaaaaacaaagccaCTTCAGCTTCCCGATATCCGACGGTAGTGTcaaacgctccattctctt  |
| SPTAN1_MIP_20 | caggtggacaactggatgagcaCTTCAGCTTCCCGATATCCGACGGTAGTGTcctatgtcctatgccc   |
| SPTAN1_MIP_21 | cagtgctccgtagaagagcCTTCAGCTTCCCGATATCCGACGGTAGTGTatggtactgatctctaaaa   |
| SPTAN1_MIP_22 | cagtaagacccttctgtcaCTTCAGCTTCCCGATATCCGACGGTAGTGTacatttggcttcttggc     |
| SPTAN1_MIP_23 | cctcctgggcactaaggatttCTTCAGCTTCCCGATATCCGACGGTAGTGTaccacaggagctactctg  |
| SPTAN1_MIP_24 | atgctcctcttttggtaCTTCAGCTTCCCGATATCCGACGGTAGTGTtcttcaatgaagaactc       |

|               |                                                                        |
|---------------|------------------------------------------------------------------------|
| SPTAN1_MIP_25 | gagttcttcattggtaagcacacCTTCAGCTTCCCGATATCCGACGGTAGTGTcaaaaaggaggagcatg |
| SPTAN1_MIP_26 | atgagctcaagagttgggcaatCTTCAGCTTCCCGATATCCGACGGTAGTGTctagagactcacagggg  |
| SPTAN1_MIP_27 | agaatcacggaaaaactctgCTTCAGCTTCCCGATATCCGACGGTAGTGTacaatttattgtgagagc   |
| SPTAN1_MIP_28 | ctgattgatgtcaaccactatgCTTCAGCTTCCCGATATCCGACGGTAGTGTaagaaccctctcttta   |
| SPTAN1_MIP_29 | ggccagcttttccaaggaCTTCAGCTTCCCGATATCCGACGGTAGTGTgcacaattcaatggaacat    |
| SPTAN1_MIP_30 | cggatgattacggcaaaagatCTTCAGCTTCCCGATATCCGACGGTAGTGTaaagcagtaaaaataaac  |
| SPTAN1_MIP_31 | agccaagtacgcttctactcaCTTCAGCTTCCCGATATCCGACGGTAGTGTtctcattcacttgccc    |
| SPTAN1_MIP_32 | cgctatgaggcactcaaggagCTTCAGCTTCCCGATATCCGACGGTAGTGTgtaaagctgctctgtcct  |
| SPTAN1_MIP_33 | cacgaggcttctgcttctctCTTCAGCTTCCCGATATCCGACGGTAGTGTcaatgggctcttctctc    |
| SPTAN1_MIP_34 | ggatgggagggtcgaatttaaaCTTCAGCTTCCCGATATCCGACGGTAGTGTatgaggagacgtggatt  |
| SPTAN1_MIP_35 | catggtggaggaaggtgagtgatCTTCAGCTTCCCGATATCCGACGGTAGTGTggagctgtctgcttt   |
| SPTAN1_MIP_36 | cattcccctctgtgtaactgcCTTCAGCTTCCCGATATCCGACGGTAGTGTgggagtgattcagcccc   |
| SPTAN1_MIP_37 | gcaggcccagcagctcttgCTTCAGCTTCCCGATATCCGACGGTAGTGTctctttccctaccactctc   |
| SPTAN1_MIP_38 | gggaagcttggcttcagtgCTTCAGCTTCCCGATATCCGACGGTAGTGTgagcttctgctctgcca     |
| SPTAN1_MIP_39 | gcttgactgagaaggaagtagCTTCAGCTTCCCGATATCCGACGGTAGTGTaaagcagctgaatcct    |
| SPTAN1_MIP_40 | gtttatgggttactggaggaggCTTCAGCTTCCCGATATCCGACGGTAGTGTcattgtgtggtttgtg   |
| SPTAN1_MIP_41 | aaacaaaaccacacatggagcCTTCAGCTTCCCGATATCCGACGGTAGTGTccctccagtaaccataa   |
| SPTAN1_MIP_42 | ccttacctactcaacagcacCTTCAGCTTCCCGATATCCGACGGTAGTGTtttgccttctcttggatt   |
| SPTAN1_MIP_43 | cccttctcatgtgacacCTTCAGCTTCCCGATATCCGACGGTAGTGTtctcatttccagggagcat     |
| SPTAN1_MIP_44 | caaggcagcatagcactgCTTCAGCTTCCCGATATCCGACGGTAGTGTcagttctcctctttttctc    |
| SPTAN1_MIP_45 | gactgggcggggtccaatttcCTTCAGCTTCCCGATATCCGACGGTAGTGTcatgtggaacagatagc   |
| SPTAN1_MIP_46 | gctaccctatccttctcctctCTTCAGCTTCCCGATATCCGACGGTAGTGTcatgcttttctgtgccc   |
| SPTAN1_MIP_47 | gagggggcacagaaaagcatCTTCAGCTTCCCGATATCCGACGGTAGTGTcagagggagaatggatagg  |
| SPTAN1_MIP_48 | gagaaggaagcctctgacCTTCAGCTTCCCGATATCCGACGGTAGTGTgcacccttgaattccat      |
| SPTAN1_MIP_49 | gcttcacggaacaacataaactCTTCAGCTTCCCGATATCCGACGGTAGTGTgaagactgccatacctt  |
| SPTAN1_MIP_50 | gtgcagtggtatgactctggcCTTCAGCTTCCCGATATCCGACGGTAGTGTagaagttgatgactcca   |
| SPTAN1_MIP_51 | caacaggtaggtgtctcatcCTTCAGCTTCCCGATATCCGACGGTAGTGTgggttttagttattatggc  |
| SPTAN1_MIP_52 | agaccttcagactccaggtctCTTCAGCTTCCCGATATCCGACGGTAGTGTgtatgaaacactgctgtg  |
| SPTAN1_MIP_53 | gggaagaatatcaagccaagaCTTCAGCTTCCCGATATCCGACGGTAGTGTgagaagactgttattctt  |
| SPTAN1_MIP_54 | agagagaaaccagtttattattaCTTCAGCTTCCCGATATCCGACGGTAGTGTgacaattctgatgaag  |
| SPTAN1_MIP_55 | gtgtgccttctctgaatattcCTTCAGCTTCCCGATATCCGACGGTAGTGTgcataaattcctcttct   |
| SPTAN1_MIP_56 | gaaagaggaatttaggcagccaaCTTCAGCTTCCCGATATCCGACGGTAGTGTtcagagaaaggcacac  |
| SPTAN1_MIP_57 | gtctacagcagagcttcttCTTCAGCTTCCCGATATCCGACGGTAGTGTtctgcttctcctctacc     |
| SPTAN1_MIP_58 | ggtaggaggagaaagcagaaggCTTCAGCTTCCCGATATCCGACGGTAGTGTaagagctctgctgtagac |
| SPTAN1_MIP_59 | ggctgggagaggagaaacagCTTCAGCTTCCCGATATCCGACGGTAGTGTctgatgtttctgtctctg   |
| SPTAN1_MIP_60 | cctgtcatccccagctcagCTTCAGCTTCCCGATATCCGACGGTAGTGTctgtggaacctctgtacttc  |
| SPTAN1_MIP_61 | gagggcttcagaggggactctCTTCAGCTTCCCGATATCCGACGGTAGTGTaacctgaaatgtgtctgc  |
| SPTAN1_MIP_62 | ggacactggcagatcatgtctcCTTCAGCTTCCCGATATCCGACGGTAGTGTctgcagaacagaagactc |
| SPTAN1_MIP_63 | ggaacgtgcagatcagcCTTCAGCTTCCCGATATCCGACGGTAGTGTcattcacccttctccca       |
| SPTAN1_MIP_64 | gctccaggcctggttaactcCTTCAGCTTCCCGATATCCGACGGTAGTGTctcaaaagaaggctctatg  |
| SPTAN1_MIP_65 | gtggacctgctgctgagtagCTTCAGCTTCCCGATATCCGACGGTAGTGTctattttctggggctgctg  |
| SPTAN1_MIP_66 | gaaaccagcaccagaaaaatagCTTCAGCTTCCCGATATCCGACGGTAGTGTtactcagcaggcagg    |
| SPTAN1_MIP_67 | aactgtatattctgaccaggagCTTCAGCTTCCCGATATCCGACGGTAGTGTcccttccctcttttgg   |
| SPTAN1_MIP_68 | gcttgatctcagggtgcatCTTCAGCTTCCCGATATCCGACGGTAGTGTgaaggaacacttggtca     |
| SPTAN1_MIP_69 | caaaaaacatgaagactttgacaCTTCAGCTTCCCGATATCCGACGGTAGTGTacctgcctctgcccct  |
| SPTAN1_MIP_70 | cagagcctctacgtgtccaCTTCAGCTTCCCGATATCCGACGGTAGTGTcttgagataaacagtac     |
| SPTAN1_MIP_71 | gtgtcctgtgactgacatCTTCAGCTTCCCGATATCCGACGGTAGTGTtctcatgctttgtttctg     |
| SPTAN1_MIP_72 | cagaaaaaaaggcatgagatcaCTTCAGCTTCCCGATATCCGACGGTAGTGTcagtcacagagacac    |
| SPTAN1_MIP_73 | gaaaaattgcaaacagcagctCTTCAGCTTCCCGATATCCGACGGTAGTGTtctcatggtttcactctt  |
| SPTAN1_MIP_74 | ccacatcccggctgaactgtCTTCAGCTTCCCGATATCCGACGGTAGTGTtctactcaataacaaggc   |
| SPTAN1_MIP_75 | ggttctggtgtctctcaCTTCAGCTTCCCGATATCCGACGGTAGTGTcttcttctttaaactgttt     |
| SPTAN1_MIP_76 | aacagataaaagaacaagagttcCTTCAGCTTCCCGATATCCGACGGTAGTGTtagacaccagcaaacg  |
| SPTAN1_MIP_77 | attgaactggagcctgtgccCTTCAGCTTCCCGATATCCGACGGTAGTGTtagcaggaactggtttgaa  |
| SPTAN1_MIP_78 | aggagattgccatgtcgaCTTCAGCTTCCCGATATCCGACGGTAGTGTctaagactgatgtccaag     |
| SPTAN1_MIP_79 | gcagaactcaacacaggaCTTCAGCTTCCCGATATCCGACGGTAGTGTcttcatagatttactctct    |
| SPTAN1_MIP_80 | gcttgtgctcttctcagttCTTCAGCTTCCCGATATCCGACGGTAGTGTggtttgggactgagtg      |
| SPTAN1_MIP_81 | gtaagcaaggaggcggcCTTCAGCTTCCCGATATCCGACGGTAGTGTcttcttcttctgttttca      |
| SPTAN1_MIP_82 | catgggcagatatctgctCTTCAGCTTCCCGATATCCGACGGTAGTGTacaaccttggagaatggct    |
| SPTAN1_MIP_83 | cagaagatcaagagcatggcCTTCAGCTTCCCGATATCCGACGGTAGTGTgacctctatgtcccct     |
| SPTAN1_MIP_84 | gcccgttgatggtgtcctctCTTCAGCTTCCCGATATCCGACGGTAGTGTctagaggctgagaagaca   |
| SPTAN1_MIP_85 | ccggctattcaggaaggagCTTCAGCTTCCCGATATCCGACGGTAGTGTctgtttccatctctcatt    |
| SPTAN1_MIP_86 | gcttctcctcaggtctgcacCTTCAGCTTCCCGATATCCGACGGTAGTGTgaataaagcgaagggg     |
| SPTAN1_MIP_87 | aaagagctgaagcagctgcaCTTCAGCTTCCCGATATCCGACGGTAGTGTtagctactgctgtaacct   |
| SPTAN1_MIP_88 | gtgtgtcatcgacagcttctCTTCAGCTTCCCGATATCCGACGGTAGTGTgctggccttccacttg     |
| SPTAN1_MIP_89 | attatggcagactctgcccCTTCAGCTTCCCGATATCCGACGGTAGTGTgatttcttctgtctct      |

|                |                                                                        |
|----------------|------------------------------------------------------------------------|
| SPTAN1_MIP_90  | ggccaccagggtcattttctcatCTTCAGCTTCCCGATATCCGACGGTAGTGTgagcaggggccctcaac |
| SPTAN1_MIP_91  | cccattggaagacctccatcgCTTCAGCTTCCCGATATCCGACGGTAGTGTctctggctcttctactc   |
| SPTAN1_MIP_92  | gagtagaagcagccaaggcacCTTCAGCTTCCCGATATCCGACGGTAGTGTggaggcttccaatggg    |
| SPTAN1_MIP_93  | actggcctctctcagttcaaCTTCAGCTTCCCGATATCCGACGGTAGTGTgtgtgctctctccatg     |
| SPTAN1_MIP_94  | gctttctccaggctgacactttCTTCAGCTTCCCGATATCCGACGGTAGTGTcagctctgggaaggctc  |
| SPTAN1_MIP_95  | gtatgcagatagcatctgtgagCTTCAGCTTCCCGATATCCGACGGTAGTGTattttccacactctgttt |
| SPTAN1_MIP_96  | gtggaaaataactgccctccCTTCAGCTTCCCGATATCCGACGGTAGTGTatctgcatactttcaacc   |
| SPTAN1_MIP_97  | gttcagccaaggccatcgagCTTCAGCTTCCCGATATCCGACGGTAGTGTctgtggagtcaccacaaat  |
| SPTAN1_MIP_98  | gagaagctgatctttgagggaCTTCAGCTTCCCGATATCCGACGGTAGTGTcggaagtgactctgag    |
| SPTAN1_MIP_99  | ggaagctgtgagctcagtgcaCTTCAGCTTCCCGATATCCGACGGTAGTGTcaagaagaagcttggag   |
| SPTAN1_MIP_100 | aaatcaaagctttgcgagggCTTCAGCTTCCCGATATCCGACGGTAGTGTactcagctctctctgtctc  |
| SPTAN1_MIP_101 | cggggctgttaagtctctctCTTCAGCTTCCCGATATCCGACGGTAGTGTcggaagctcttgactgg    |
| SPTAN1_MIP_102 | aaaatcatcaaggtacacctcccCTTCAGCTTCCCGATATCCGACGGTAGTGTgctctgccaggctga   |
| SPTAN1_MIP_103 | gggcctccatgtaaacaggCTTCAGCTTCCCGATATCCGACGGTAGTGTcttctgtgactcagtta     |
| SPTAN1_MIP_104 | cgccaggagttggccagcacCTTCAGCTTCCCGATATCCGACGGTAGTGTgagccatctggaaggag    |
| SPTAN1_MIP_105 | ccgctgttctctgagctCTTCAGCTTCCCGATATCCGACGGTAGTGTcttaagtacagcaggacat     |
| SPTAN1_MIP_106 | gtggctggctgtggaggaCTTCAGCTTCCCGATATCCGACGGTAGTGTgtttgccgacaccactt      |
| SPTAN1_MIP_107 | gagacaagtggtgtccggaacaCTTCAGCTTCCCGATATCCGACGGTAGTGTatctccacaagccag    |
| SPTAN1_MIP_108 | gtggggctctggcccagcagagaCTTCAGCTTCCCGATATCCGACGGTAGTGTtctcattctgagctctc |
| SPTAN1_MIP_109 | acgtggaaggacagtgaggaaagCTTCAGCTTCCCGATATCCGACGGTAGTGTagggaagggtaccctg  |
| SPTAN1_MIP_110 | acatggaaggacagtgaggaaagCTTCAGCTTCCCGATATCCGACGGTAGTGTagggaagggtaccctg  |
| SPTAN1_MIP_111 | cctcatctggaacaagaacacCTTCAGCTTCCCGATATCCGACGGTAGTGTgactgagctgagggc     |
| SPTAN1_MIP_112 | caggctctgatcttttgagctCTTCAGCTTCCCGATATCCGACGGTAGTGTctgctctccagggtgt    |
| SPTAN1_MIP_113 | ccctaattctgtttttctccagCTTCAGCTTCCCGATATCCGACGGTAGTGTgggcatgcatgag      |
| SPTAN1_MIP_114 | gaacagacctccacacagcaggtCTTCAGCTTCCCGATATCCGACGGTAGTGTctgctgcccgaacacc  |
| SPTAN1_MIP_115 | gagttcaggcaatctggacacCTTCAGCTTCCCGATATCCGACGGTAGTGTccctggcttggctg      |
| SPTAN1_MIP_116 | caggcaagattgaactcctgatCTTCAGCTTCCCGATATCCGACGGTAGTGTcgggcagaggctcaca   |
| SPTAN1_MIP_117 | gagggaagcctacgtgaccaagCTTCAGCTTCCCGATATCCGACGGTAGTGTttgctctccccgctcc   |
| SPTAN1_MIP_118 | gctctcaatctcctgctggaCTTCAGCTTCCCGATATCCGACGGTAGTGTctcagctctgccacaaatt  |
| SPTAN1_MIP_119 | cgctttctgtaactgagccaCTTCAGCTTCCCGATATCCGACGGTAGTGTgggtccatcttaccaca    |
| SPTAN1_MIP_120 | gggtgaactccactgagctgaaCTTCAGCTTCCCGATATCCGACGGTAGTGTaagtaagcaggcttaag  |
| CDKL5_MIP_1    | cgctcttgagtttgagcaatCTTCAGCTTCCCGATATCCGACGGTAGTGTcttttggctcatgtttt    |
| CDKL5_MIP_2    | actcctctttgatgcaagcCTTCAGCTTCCCGATATCCGACGGTAGTGTggtggaataactaactgtt   |
| CDKL5_MIP_3    | gtcttctgctgaggcatgtaCTTCAGCTTCCCGATATCCGACGGTAGTGTgcccttgattgttacttc   |
| CDKL5_MIP_4    | aaagaagtaaacatcaaggccCTTCAGCTTCCCGATATCCGACGGTAGTGTacatgccaccacgcaaa   |
| CDKL5_MIP_5    | gttttatacatagagtggtCTTCAGCTTCCCGATATCCGACGGTAGTGTtctctctgctcttttcc     |
| CDKL5_MIP_6    | agggaaaagaagcagaaggaCTTCAGCTTCCCGATATCCGACGGTAGTGTccacactctatgataaaa   |
| CDKL5_MIP_7    | ggggaaagttgacttggtCTTCAGCTTCCCGATATCCGACGGTAGTGTtttttagtctctaccatt     |
| CDKL5_MIP_8    | gttttctgctgagagctcctCTTCAGCTTCCCGATATCCGACGGTAGTGTgacagaacagccttaaat   |
| CDKL5_MIP_9    | actggtccataagaatgatatCTTCAGCTTCCCGATATCCGACGGTAGTGTgcttaccataattgggaa  |
| CDKL5_MIP_10   | aggtggaactcattggcaCTTCAGCTTCCCGATATCCGACGGTAGTGTactcttaactttatgtgag    |
| CDKL5_MIP_11   | gtaacacataggtagctttCTTCAGCTTCCCGATATCCGACGGTAGTGTtttttttatcttgacact    |
| CDKL5_MIP_12   | gagtgtaagataaaaaaaaaCTTCAGCTTCCCGATATCCGACGGTAGTGTaaaagctacctatgttta   |
| CDKL5_MIP_13   | ggtgagttaccgtccaaaaCTTCAGCTTCCCGATATCCGACGGTAGTGTtctttttcaaaagtacaac   |
| CDKL5_MIP_14   | gcattattgcctctgacagaCTTCAGCTTCCCGATATCCGACGGTAGTGTgagtaactcaaaagcaaat  |
| CDKL5_MIP_15   | cttagcagtgagacgcttctCTTCAGCTTCCCGATATCCGACGGTAGTGTgttccaataattggaaa    |
| CDKL5_MIP_16   | cccaagaatacagcccaccgacCTTCAGCTTCCCGATATCCGACGGTAGTGTcatggaagcaggattac  |
| CDKL5_MIP_17   | ggaatgctaaactatctttgaaCTTCAGCTTCCCGATATCCGACGGTAGTGTcacttccatctgacag   |
| CDKL5_MIP_18   | ggtaaggccaattgatattatctCTTCAGCTTCCCGATATCCGACGGTAGTGTcacatgctctcccaaa  |
| CDKL5_MIP_19   | ggtatcttctccaaggactCTTCAGCTTCCCGATATCCGACGGTAGTGTtattcataaaagcaggc     |
| CDKL5_MIP_20   | gttctctcaaggctagcaCTTCAGCTTCCCGATATCCGACGGTAGTGTgactttgtaattgtcttaa    |
| CDKL5_MIP_21   | atcagaagtctctgggtttaaCTTCAGCTTCCCGATATCCGACGGTAGTGTcactctccactact      |
| CDKL5_MIP_22   | gtctccctccaatgaaagcCTTCAGCTTCCCGATATCCGACGGTAGTGTggaactgatatactcttt    |
| CDKL5_MIP_23   | gggcaggcctacactcaggtCTTCAGCTTCCCGATATCCGACGGTAGTGTgtgagatcttctggtgag   |
| CDKL5_MIP_24   | cagggcaaaagtacctcaagtcaaCTTCAGCTTCCCGATATCCGACGGTAGTGTaagcagccagctggg  |
| CDKL5_MIP_25   | gcctctgaaggctttgggtCTTCAGCTTCCCGATATCCGACGGTAGTGTgtgtcaatatagctatgcc   |
| CDKL5_MIP_26   | gtctgtgagcaactttctgagCTTCAGCTTCCCGATATCCGACGGTAGTGTcaagctgggacactgc    |
| CDKL5_MIP_27   | ccttgctctgtaggaggactCTTCAGCTTCCCGATATCCGACGGTAGTGTctggtgggagaattcaag   |
| CDKL5_MIP_28   | cacaaccagacattcaagacCTTCAGCTTCCCGATATCCGACGGTAGTGTtccatctagctgcttag    |
| CDKL5_MIP_29   | ccagcttccctcattcggtCTTCAGCTTCCCGATATCCGACGGTAGTGTggtgtagccagctcaaaa    |
| CDKL5_MIP_30   | catagggcaaggatggcagcCTTCAGCTTCCCGATATCCGACGGTAGTGTgacacctacgaatctttt   |
| CDKL5_MIP_31   | caagcttccatcaagccctgCTTCAGCTTCCCGATATCCGACGGTAGTGTggacctcatcatatccc    |
| CDKL5_MIP_32   | cagaagtctgaggtatgtcacCTTCAGCTTCCCGATATCCGACGGTAGTGTaacaggatgctcttataaa |
| CDKL5_MIP_33   | ctgtgatggaaggaaaggctCTTCAGCTTCCCGATATCCGACGGTAGTGTtactactttataagccac   |
| CDKL5_MIP_34   | gtccaaggagagttgtagCTTCAGCTTCCCGATATCCGACGGTAGTGTaggcaatattgtcatatag    |

|               |                                                                      |
|---------------|----------------------------------------------------------------------|
| CDKL5_MIP_35  | gggtctattttcttgggggctCTTCAGTCCCGATATCCGACGGTAGTGTggcctgagtcggtgaa    |
| CDKL5_MIP_36  | aaaagacaaccagcattcagCTTCAGTCCCGATATCCGACGGTAGTGTgtagcattcagtgactact  |
| CDKL5_MIP_37  | gagtggttggtccagaactgcCTTCAGTCCCGATATCCGACGGTAGTGTgcttagcaggagaaaagga |
| CDKL5_MIP_38  | ggtcaatgaaaaaagaaaagaaCTTCAGTCCCGATATCCGACGGTAGTGTtttgcacacaatggca   |
| CDKL5_MIP_39  | aaatccttgcttcttttccCTTCAGTCCCGATATCCGACGGTAGTGTatcaacttgattgcca      |
| CDKL5_MIP_40  | agatctcagatctcagaccCTTCAGTCCCGATATCCGACGGTAGTGTgtcttattgaatgctgtc    |
| CDKL5_MIP_41  | cctttggtctgctgttggagCTTCAGTCCCGATATCCGACGGTAGTGTgagaggcctaatttctct   |
| CDKL5_MIP_42  | attcctctcagaattcgaCTTCAGTCCCGATATCCGACGGTAGTGTgattctcatcttcttct      |
| CDKL5_MIP_43  | attgaggccgaagagatgtaCTTCAGTCCCGATATCCGACGGTAGTGTgggttctccggatgt      |
| CDKL5_MIP_44  | ccttctactctgaacagctgggCTTCAGTCCCGATATCCGACGGTAGTGTaggcctctggcggag    |
| CDKL5_MIP_45  | caagctgccataacgacctCTTCAGTCCCGATATCCGACGGTAGTGTttttgttctcccactaac    |
| CDKL5_MIP_46  | gtagtgaggagaaacaaagaCTTCAGTCCCGATATCCGACGGTAGTGTggctgtatggcagcttg    |
| CDKL5_MIP_47  | ccgaggcacttcatgtgccCTTCAGTCCCGATATCCGACGGTAGTGTactgcctctgaatatttct   |
| CDKL5_MIP_48  | cctggagtactggataggagcCTTCAGTCCCGATATCCGACGGTAGTGTgcaattccgaggtacagc  |
| CDKL5_MIP_49  | gctgcgctctgacatacctCTTCAGTCCCGATATCCGACGGTAGTGTcagagtgcacctgtagc     |
| CDKL5_MIP_50  | ggttacctggccctgtgaCTTCAGTCCCGATATCCGACGGTAGTGTatgggtgattcattggtgt    |
| ARX_MIP_1     | ccttgccctgagcctcagcCTTCAGTCCCGATATCCGACGGTAGTGTgagtggtgctgagtgaggt   |
| ARX_MIP_2     | gcacgcgccgagctcagcagctCTTCAGTCCCGATATCCGACGGTAGTGTgctcctctgagacagc   |
| ARX_MIP_3     | cgctcgggagcgtctcccgctCTTCAGTCCCGATATCCGACGGTAGTGTtccacggagctggctg    |
| ARX_MIP_4     | gaggagtaggctcgggaaggCTTCAGTCCCGATATCCGACGGTAGTGTgacttccgagctgctg     |
| ARX_MIP_5     | cggccagcctgcccagcCTTCAGTCCCGATATCCGACGGTAGTGTcaccaccgctcagcccc       |
| ARX_MIP_6     | ggttctggaaccagactcgaaggCTTCAGTCCCGATATCCGACGGTAGTGTcggagggaaggggctg  |
| ARX_MIP_7     | cggccaagtggcgcaagcgggaCTTCAGTCCCGATATCCGACGGTAGTGTcgcggtgaaaggaagg   |
| ARX_MIP_8     | ctattctctctatggcaggcCTTCAGTCCCGATATCCGACGGTAGTGTtcttcctctgttgtgc     |
| ARX_MIP_9     | gctgcacaacagagggaagagCTTCAGTCCCGATATCCGACGGTAGTGTcctgccaatagaggagaaa |
| ARX_MIP_10    | ccctctccgagtcgctcccCTTCAGTCCCGATATCCGACGGTAGTGTgaccaccctcagcgc       |
| ARX_MIP_11    | caggttcaccagctaccagctgCTTCAGTCCCGATATCCGACGGTAGTGTaccaaaggaggagctc   |
| ARX_MIP_12    | gcgcggggctgctctccagcCTTCAGTCCCGATATCCGACGGTAGTGTcgtcttccgggtcagc     |
| ARX_MIP_13    | cagcagctgctcctcagctCTTCAGTCCCGATATCCGACGGTAGTGTaggacaagaagagaggac    |
| ARX_MIP_14    | cgggtgctgagcctccgggCTTCAGTCCCGATATCCGACGGTAGTGTcagagcttcttctct       |
| ARX_MIP_15    | aggagcctcggcgtggccCTTCAGTCCCGATATCCGACGGTAGTGTcgtcaagatcagcaggcg     |
| ARX_MIP_16    | cggaggggctccccgctgCTTCAGTCCCGATATCCGACGGTAGTGTcggcgtgatctcactcgg     |
| ARX_MIP_17    | cgccaccgcaaccgctggCTTCAGTCCCGATATCCGACGGTAGTGTgctcggcctgtacggc       |
| ARX_MIP_18    | cggggagtccagcaggcctgCTTCAGTCCCGATATCCGACGGTAGTGTggaggcggcccccgcc     |
| ARX_MIP_19    | gatgtagtaggagagcaaaCTTCAGTCCCGATATCCGACGGTAGTGTcctgacgggagatcct      |
| ARX_MIP_20    | cccgtcaaaatgctggtgCTTCAGTCCCGATATCCGACGGTAGTGTcctgggaaaagccccag      |
| PCDH19_MIP_1  | gggctcagctcagaggagcCTTCAGTCCCGATATCCGACGGTAGTGTtttcttcttctggagac     |
| PCDH19_MIP_2  | ggagctgatagcagaaagctCTTCAGTCCCGATATCCGACGGTAGTGTaagagctctctcccac     |
| PCDH19_MIP_3  | catcgacagctcttcttctCTTCAGTCCCGATATCCGACGGTAGTGTgtagaacagggaaggc      |
| PCDH19_MIP_4  | gaggcattagcctgtaccCTTCAGTCCCGATATCCGACGGTAGTGTcaaccttgggaaagatgt     |
| PCDH19_MIP_5  | cacatgctcagggacttgaacCTTCAGTCCCGATATCCGACGGTAGTGTcctctcctcagcgggt    |
| PCDH19_MIP_6  | ggaacatcatcgctgtctCTTCAGTCCCGATATCCGACGGTAGTGTtttcttttccaaacagat     |
| PCDH19_MIP_7  | ccttgggaaatggcacttttagCTTCAGTCCCGATATCCGACGGTAGTGTggcattctccggca     |
| PCDH19_MIP_8  | gtcactctctcatgtccactaCTTCAGTCCCGATATCCGACGGTAGTGTtaccatccaaccagctct  |
| PCDH19_MIP_9  | catgatgtccagggagcctCTTCAGTCCCGATATCCGACGGTAGTGTtttaaaatcagatctgtca   |
| PCDH19_MIP_10 | gatttcaactgcctacttagaCTTCAGTCCCGATATCCGACGGTAGTGTaagcaagcaaaccaaca   |
| PCDH19_MIP_11 | gttggttcttcttattgctCTTCAGTCCCGATATCCGACGGTAGTGTtagggcagcttcaaatct    |
| PCDH19_MIP_12 | gttctccacattcagaaagctCTTCAGTCCCGATATCCGACGGTAGTGTacagagcacttagctg    |
| PCDH19_MIP_13 | gaataccgcaacaccagctCTTCAGTCCCGATATCCGACGGTAGTGTtagacagacaagatgaacg   |
| PCDH19_MIP_14 | attctatgtgacagaaaggcagCTTCAGTCCCGATATCCGACGGTAGTGTaggaaagagcaactgac  |
| PCDH19_MIP_15 | gctgagtactcctatggcaCTTCAGTCCCGATATCCGACGGTAGTGTatgtaatcaccagaataag   |
| PCDH19_MIP_16 | agccgaggagacaagttagctCTTCAGTCCCGATATCCGACGGTAGTGTatgagggaaatgccttt   |
| PCDH19_MIP_17 | aaggacaaaacagcaagtgtctCTTCAGTCCCGATATCCGACGGTAGTGTctttatgttccagtga   |
| PCDH19_MIP_18 | atcaaggacaagtcaacagagcCTTCAGTCCCGATATCCGACGGTAGTGTaagaaagaaactggct   |
| PCDH19_MIP_19 | cattattgcctgggctcattCTTCAGTCCCGATATCCGACGGTAGTGTatgagctatcgtgggtg    |
| PCDH19_MIP_20 | ggtcatgtcgtagtgactggCTTCAGTCCCGATATCCGACGGTAGTGTgagatgcttccggtgt     |
| PCDH19_MIP_21 | gaccgcttcttgaatatCTTCAGTCCCGATATCCGACGGTAGTGTtctgattaacggcactgc      |
| PCDH19_MIP_22 | ccttggccagcacttgaattCTTCAGTCCCGATATCCGACGGTAGTGTtggggatgtatgacc      |
| PCDH19_MIP_23 | gctacgtgctggctcatcatCTTCAGTCCCGATATCCGACGGTAGTGTtccactatgtccatcaa    |
| PCDH19_MIP_24 | cagataggccagcagctgttCTTCAGTCCCGATATCCGACGGTAGTGTtagatgtcctgagttgg    |
| PCDH19_MIP_25 | gacctggctcaaccgagctCTTCAGTCCCGATATCCGACGGTAGTGTgcttaccctgctcat       |
| PCDH19_MIP_26 | cagaatagtggagaagctctCTTCAGTCCCGATATCCGACGGTAGTGTggtgtcattttcgtcag    |
| PCDH19_MIP_27 | gcacgaccaatacaacctcaactCTTCAGTCCCGATATCCGACGGTAGTGTgtgtctgatcgcgact  |
| PCDH19_MIP_28 | attgtcattggttccagcagcCTTCAGTCCCGATATCCGACGGTAGTGTactgcacagctcattga   |
| PCDH19_MIP_29 | cggctatcaacctgctcagctCTTCAGTCCCGATATCCGACGGTAGTGTactggcctttagactac   |



|                 |                                                                         |
|-----------------|-------------------------------------------------------------------------|
| PCDH19_MIP_30   | catagaaggagtagaccacctggCTTCAGCTTCCCGATATCCGACGGTAGTGTccaagctcttagctgc   |
| PCDH19_MIP_31   | gctctttcagatcgaccgcacaCTTCAGCTTCCCGATATCCGACGGTAGTGTggtagctgcccagaaa    |
| PCDH19_MIP_32   | ccaccgtctagcgcagtgattcCTTCAGCTTCCCGATATCCGACGGTAGTGTgacgggtgtgtgggagg   |
| PCDH19_MIP_33   | gactcfaatgacaacaaccggCTTCAGCTTCCCGATATCCGACGGTAGTGTtttgcgaactcgtggt     |
| PCDH19_MIP_34   | cgcaaaagctcctgagctgCTTCAGCTTCCCGATATCCGACGGTAGTGTaagctgtagtgcgactgc     |
| PCDH19_MIP_35   | gcagacttacagagctcagccCTTCAGCTTCCCGATATCCGACGGTAGTGTaaggacctgaacgacaatg  |
| PCDH19_MIP_36   | ggtcaatcttctgctgtgaccCTTCAGCTTCCCGATATCCGACGGTAGTGTctgcccggaaactgggc    |
| PCDH19_MIP_37   | gaggtcatgtccagctcaatggaCTTCAGCTTCCCGATATCCGACGGTAGTGTtttccgctgggtgcaaa  |
| PCDH19_MIP_38   | gcctgctcctctctaccgaCTTCAGCTTCCCGATATCCGACGGTAGTGTgagctgggattgatgcca     |
| PCDH19_MIP_39   | ggtgattgccaacgtggccaaagaCTTCAGCTTCCCGATATCCGACGGTAGTGTgacagaccccgtagcag |
| CACNA2D1_MIP_1  | aacaccaccacagctcagataaaCTTCAGCTTCCCGATATCCGACGGTAGTGTgggtcggagttaacta   |
| CACNA2D1_MIP_2  | ccctgtggtatattcattggaaCTTCAGCTTCCCGATATCCGACGGTAGTGTggattactctgaaagatgt |
| CACNA2D1_MIP_3  | cgtagcctaaaagagactgtCTTCAGCTTCCCGATATCCGACGGTAGTGTggacagtgaccattaatt    |
| CACNA2D1_MIP_4  | ccaaatcctgtgacatggtCTTCAGCTTCCCGATATCCGACGGTAGTGTtggatgagagtaaatgatg    |
| CACNA2D1_MIP_5  | gcttttccatgaaagattctCTTCAGCTTCCCGATATCCGACGGTAGTGTatggttttccctccaga     |
| CACNA2D1_MIP_6  | agcaaaaggacatgctcatCTTCAGCTTCCCGATATCCGACGGTAGTGTatgtaagaatcttgaaga     |
| CACNA2D1_MIP_7  | gtcatcatcctccatctcaacCTTCAGCTTCCCGATATCCGACGGTAGTGTctctgaaataaataaatt   |
| CACNA2D1_MIP_8  | ggcctcccgtccaagcagaCTTCAGCTTCCCGATATCCGACGGTAGTGTcttatacgtttattttgctc   |
| CACNA2D1_MIP_9  | gtttttacatgtaccatacacaCTTCAGCTTCCCGATATCCGACGGTAGTGTatgacaaggtctgagca   |
| CACNA2D1_MIP_10 | gtaaatgctcagacctgtcaCTTCAGCTTCCCGATATCCGACGGTAGTGTatgtatggttacctgta     |
| CACNA2D1_MIP_11 | gtcaaaatttagttttattCTTCAGCTTCCCGATATCCGACGGTAGTGTcaattctcaaggggtactca   |
| CACNA2D1_MIP_12 | ataagattgttaaaagcatCTTCAGCTTCCCGATATCCGACGGTAGTGTtactgatactgaggacact    |
| CACNA2D1_MIP_13 | cagtcagtagtgagccggtCTTCAGCTTCCCGATATCCGACGGTAGTGTattttaagtcagcgttct     |
| CACNA2D1_MIP_14 | caaaataaagtgaacagttaacacCTTCAGCTTCCCGATATCCGACGGTAGTGTtccgggaaacacact   |
| CACNA2D1_MIP_15 | gctttcaaaagtgtttcccCTTCAGCTTCCCGATATCCGACGGTAGTGTaatgtttaactgttcaact    |
| CACNA2D1_MIP_16 | gttataattagaaatctgaaatCTTCAGCTTCCCGATATCCGACGGTAGTGTatgtatttaaatagtt    |
| CACNA2D1_MIP_17 | gaaaactattaaatcacttCTTCAGCTTCCCGATATCCGACGGTAGTGTttcagaatttctaattat     |
| CACNA2D1_MIP_18 | gtataattagatgtaatacaacCTTCAGCTTCCCGATATCCGACGGTAGTGTacatagcataaagaatttt |
| CACNA2D1_MIP_19 | gatatttttaaaatttctatgCTTCAGCTTCCCGATATCCGACGGTAGTGTgcaaaaggtgtattaca    |
| CACNA2D1_MIP_20 | ggcaccaggtccaatttctaCTTCAGCTTCCCGATATCCGACGGTAGTGTaatataaagccaagtaaca   |
| CACNA2D1_MIP_21 | atcgggcattatgtaagcaaCTTCAGCTTCCCGATATCCGACGGTAGTGTgctagaattttaagcaa     |
| CACNA2D1_MIP_22 | gccctaaggaggaaatggctCTTCAGCTTCCCGATATCCGACGGTAGTGTgagaaaagctgaattcaaaa  |
| CACNA2D1_MIP_23 | ggcaagaaaaccagagacatCTTCAGCTTCCCGATATCCGACGGTAGTGTcttcttagacatacctga    |
| CACNA2D1_MIP_24 | cagaagacaaaacaggaaatgCTTCAGCTTCCCGATATCCGACGGTAGTGTacaaatccttggcgagct   |
| CACNA2D1_MIP_25 | aagactgcgcaaggattgtCTTCAGCTTCCCGATATCCGACGGTAGTGTcatttctgttttcttct      |
| CACNA2D1_MIP_26 | cgcttactcaaacagaaaCTTCAGCTTCCCGATATCCGACGGTAGTGTactaaatgaaatcgaaat      |
| CACNA2D1_MIP_27 | gcaggcttacaatgaacttCTTCAGCTTCCCGATATCCGACGGTAGTGTtactctaaatgcttttg      |
| CACNA2D1_MIP_28 | gcagtaactcttgaaaaaaaCTTCAGCTTCCCGATATCCGACGGTAGTGTgaaccacactcaagcaat    |
| CACNA2D1_MIP_29 | gcagtaactctgaaaaaaaCTTCAGCTTCCCGATATCCGACGGTAGTGTgaaccacactcaagcaat     |
| CACNA2D1_MIP_30 | attcaacgagtttattgatagaaCTTCAGCTTCCCGATATCCGACGGTAGTGTgttttctactcctt     |
| CACNA2D1_MIP_31 | ggattagataggttaattcagagctCTTCAGCTTCCCGATATCCGACGGTAGTGTaaggctagctactgat |
| CACNA2D1_MIP_32 | cagtagctagccctcaacaCTTCAGCTTCCCGATATCCGACGGTAGTGTgaattacctatctaactctg   |
| CACNA2D1_MIP_33 | gcaaaaggggtcataaacaatCTTCAGCTTCCCGATATCCGACGGTAGTGTgaaatgtcaagtgact     |
| CACNA2D1_MIP_34 | gtacactgacatttccactgaCTTCAGCTTCCCGATATCCGACGGTAGTGTtttatgaccccttggct    |
| CACNA2D1_MIP_35 | agcataaacacaaaacaaaCTTCAGCTTCCCGATATCCGACGGTAGTGTaatggacctgaagta        |
| CACNA2D1_MIP_36 | gtgacttcagggtcatttctCTTCAGCTTCCCGATATCCGACGGTAGTGTgtttgtttgtttatgc      |
| CACNA2D1_MIP_37 | atatatacgaaaaagtaaagcggCTTCAGCTTCCCGATATCCGACGGTAGTGTacataaaaatagttaat  |
| CACNA2D1_MIP_38 | actgtattttatgtatttctCTTCAGCTTCCCGATATCCGACGGTAGTGTttttctgatataatcat     |
| CACNA2D1_MIP_39 | caaagctgacctgcaaaatCTTCAGCTTCCCGATATCCGACGGTAGTGTgaataagctagaatcaattc   |
| CACNA2D1_MIP_40 | gaattgattcagcttattcttaaCTTCAGCTTCCCGATATCCGACGGTAGTGTggcaggtcagcttgg    |
| CACNA2D1_MIP_41 | gggttctacacagaaaacaataCTTCAGCTTCCCGATATCCGACGGTAGTGTgagaatgagtcataacc   |
| CACNA2D1_MIP_42 | acattgatttcttgatgcaCTTCAGCTTCCCGATATCCGACGGTAGTGTatcctaggttaattttgca    |
| CACNA2D1_MIP_43 | ccattggggcacagctgaaCTTCAGCTTCCCGATATCCGACGGTAGTGTacaatcctataaagaacatt   |
| CACNA2D1_MIP_44 | atcctaattggtatgttttataCTTCAGCTTCCCGATATCCGACGGTAGTGTatacaaatgtatttta    |
| CACNA2D1_MIP_45 | caagaatcagctggttctataaCTTCAGCTTCCCGATATCCGACGGTAGTGTctaagtccaagctaagt   |
| CACNA2D1_MIP_46 | gatgggagtagatgtctttggaCTTCAGCTTCCCGATATCCGACGGTAGTGTctaagtggaaataaa     |
| CACNA2D1_MIP_47 | ccagttcctaaaaatagattcagCTTCAGCTTCCCGATATCCGACGGTAGTGTgacttcaacgtcacagt  |
| CACNA2D1_MIP_48 | cattactggaaactctccgCTTCAGCTTCCCGATATCCGACGGTAGTGTtttggctctttataaagt     |
| CACNA2D1_MIP_49 | ccattggtcttccaaaacCTTCAGCTTCCCGATATCCGACGGTAGTGTatctagaagaagtagaaaat    |
| CACNA2D1_MIP_50 | gtgtacctggatgattggttaaCTTCAGCTTCCCGATATCCGACGGTAGTGTattcaacacagcattcc   |
| CACNA2D1_MIP_51 | attattttattttataaataCTTCAGCTTCCCGATATCCGACGGTAGTGTaaacaagtttaataatca    |
| CACNA2D1_MIP_52 | gattattaaactgtttaaCTTCAGCTTCCCGATATCCGACGGTAGTGTtttataaaataaataatt      |
| CACNA2D1_MIP_53 | cgtagaacacagctactggaCTTCAGCTTCCCGATATCCGACGGTAGTGTtagtacacctaataaacta   |
| CACNA2D1_MIP_54 | ggtcaacacaattatgacagagCTTCAGCTTCCCGATATCCGACGGTAGTGTattcaactggaaagcact  |
| CACNA2D1_MIP_55 | gcagtttctctggaaacatCTTCAGCTTCCCGATATCCGACGGTAGTGTaaaaccacatgatcattat    |

|                 |                                                                         |
|-----------------|-------------------------------------------------------------------------|
| CACNA2D1_MIP_56 | gctattcacggatggaggagaagCTTCAGCTTCCCGATATCCGACGGTAGTGTgcaacctgctcatgctc  |
| CACNA2D1_MIP_57 | aacactttttatttcttaccatCTTCAGCTTCCCGATATCCGACGGTAGTGTacaattgaacaacaacaa  |
| CACNA2D1_MIP_58 | gaaggcttagtttctcttcttCTTCAGCTTCCCGATATCCGACGGTAGTGTtttgcagttaaacagca    |
| CACNA2D1_MIP_59 | gcttactcttcaaatgaaaaCTTCAGCTTCCCGATATCCGACGGTAGTGTaaacagcttaccctga      |
| CACNA2D1_MIP_60 | gacaaatgggtccatcatgCTTCAGCTTCCCGATATCCGACGGTAGTGTaatgacgtcatcttatact    |
| CACNA2D1_MIP_61 | cctgaattaaattgcaatttctCTTCAGCTTCCCGATATCCGACGGTAGTGTctaggagtgaagtg      |
| CACNA2D1_MIP_62 | gttgaattgatattactgactctCTTCAGCTTCCCGATATCCGACGGTAGTGTtagtatttaacaact    |
| CACNA2D1_MIP_63 | gggaggatttagataaacagtCTTCAGCTTCCCGATATCCGACGGTAGTGTtttgaagagaaaagcat    |
| CACNA2D1_MIP_64 | atattagatagctctaaaaataCTTCAGCTTCCCGATATCCGACGGTAGTGTcatggctagctaaaaat   |
| CACNA2D1_MIP_65 | gaatttttagctccatgaaCTTCAGCTTCCCGATATCCGACGGTAGTGTtttttagagcatatctaact   |
| CACNA2D1_MIP_66 | cactgtccagttagttcatCTTCAGCTTCCCGATATCCGACGGTAGTGTggaacttgacaatgattga    |
| CACNA2D1_MIP_67 | gcgaggaaagaccttcatCTTCAGCTTCCCGATATCCGACGGTAGTGTaataaatgaagacattcagt    |
| CACNA2D1_MIP_68 | gcctggctcactgtcatttCTTCAGCTTCCCGATATCCGACGGTAGTGTcaaacagatgtaacattct    |
| CACNA2D1_MIP_69 | gaagatgctaatttggagcacCTTCAGCTTCCCGATATCCGACGGTAGTGTgcaagtaagaagtgcat    |
| CACNA2D1_MIP_70 | atttaataaaaaaactactCTTCAGCTTCCCGATATCCGACGGTAGTGTatataaggccaacttttta    |
| CACNA2D1_MIP_71 | gtaaatgattggccttatCTTCAGCTTCCCGATATCCGACGGTAGTGTtagtattttttataaaa       |
| CACNA2D1_MIP_72 | atcttagaattcaaatgaacacCTTCAGCTTCCCGATATCCGACGGTAGTGTcatacacaatgtcaag    |
| CACNA2D1_MIP_73 | aaccttttaactactgtattCTTCAGCTTCCCGATATCCGACGGTAGTGTttttatataacaattcc     |
| CACNA2D1_MIP_74 | ctggcgtcattatttgggtCTTCAGCTTCCCGATATCCGACGGTAGTGTgagagatgaaaatataaa     |
| CACNA2D1_MIP_75 | ggtagaaattgcagccaggCTTCAGCTTCCCGATATCCGACGGTAGTGTaaatacattccaatgggaac   |
| CACNA2D1_MIP_76 | ccatgattgatactgcagaaaCTTCAGCTTCCCGATATCCGACGGTAGTGTgtagaactgcattcgaa    |
| CACNA2D1_MIP_77 | gcaagaagacctgtcacacCTTCAGCTTCCCGATATCCGACGGTAGTGTatntaaaggcattttaaaga   |
| CACNA2D1_MIP_78 | gtgtcagagtcaaggccagcaggCTTCAGCTTCCCGATATCCGACGGTAGTGTggaaccgacccccacc   |
| CACNA2D1_MIP_79 | ccaatcttggctcactcgccccCTTCAGCTTCCCGATATCCGACGGTAGTGTcgtgtgctgctctctc    |
| KCNQ2_MIP_1     | acagaggtcggagtcggtgtctCTTCAGCTTCCCGATATCCGACGGTAGTGTcaccgtgctgaggagg    |
| KCNQ2_MIP_2     | ggcgagggtccctttgggtgacCTTCAGCTTCCCGATATCCGACGGTAGTGTggatgcttcaacagctg   |
| KCNQ2_MIP_3     | gatggagatggagctgtcctCTTCAGCTTCCCGATATCCGACGGTAGTGTatgtaggacctgatttgg    |
| KCNQ2_MIP_4     | ggcttcagcatctccagctcaaaCTTCAGCTTCCCGATATCCGACGGTAGTGTgacagatgagcttctc   |
| KCNQ2_MIP_5     | ccgtggccctggcgcggtgctcCTTCAGCTTCCCGATATCCGACGGTAGTGTggcttctctctcgcc     |
| KCNQ2_MIP_6     | acctcccgtgggggaccagggCTTCAGCTTCCCGATATCCGACGGTAGTGTcaaatctgtgctc        |
| KCNQ2_MIP_7     | caaagttagcctcgttctgtCTTCAGCTTCCCGATATCCGACGGTAGTGTgcccagaagtcttctgg     |
| KCNQ2_MIP_8     | gcccggagccggcccgctaccCTTCAGCTTCCCGATATCCGACGGTAGTGTcaccaccgcccagcagc    |
| KCNQ2_MIP_9     | cgcccacagatctggtccacCTTCAGCTTCCCGATATCCGACGGTAGTGTccgaccctcccggcagc     |
| KCNQ2_MIP_10    | gatcacggacaaggaccaccaCTTCAGCTTCCCGATATCCGACGGTAGTGTgcttagaccaggggca     |
| KCNQ2_MIP_11    | ggacaccaggaaacgcatgaCTTCAGCTTCCCGATATCCGACGGTAGTGTgacaggcaggcgggctctt   |
| KCNQ2_MIP_12    | gtgatggactcatcgagcagtCTTCAGCTTCCCGATATCCGACGGTAGTGTtaggaaggtcctggctc    |
| KCNQ2_MIP_13    | gcagctctgtcatcacaatgctCTTCAGCTTCCCGATATCCGACGGTAGTGTggcaggaccaccgagc    |
| KCNQ2_MIP_14    | ccccggcctcaaagttagcagctCTTCAGCTTCCCGATATCCGACGGTAGTGTcccgggaataggtctccc |
| KCNQ2_MIP_15    | gcacctgtgggctgctctcCTTCAGCTTCCCGATATCCGACGGTAGTGTccatcccggagagagatg     |
| KCNQ2_MIP_16    | caagagctggaagcttggggCTTCAGCTTCCCGATATCCGACGGTAGTGTcagttgaaagatctgtct    |
| KCNQ2_MIP_17    | ggagagaagtactctgcaagaCTTCAGCTTCCCGATATCCGACGGTAGTGTcctcacagctgggctc     |
| KCNQ2_MIP_18    | gaggagagcacagttagtctgCTTCAGCTTCCCGATATCCGACGGTAGTGTtagtaagcaggagggg     |
| KCNQ2_MIP_19    | gcccctcctgcttactagagCTTCAGCTTCCCGATATCCGACGGTAGTGTgactaactgtctctctc     |
| KCNQ2_MIP_20    | ccccacagctccatgggtcaCTTCAGCTTCCCGATATCCGACGGTAGTGTacaccagggtagcagcag    |
| KCNQ2_MIP_21    | ccccctgctactcctggtctCTTCAGCTTCCCGATATCCGACGGTAGTGTgaccatgggactgtgg      |
| KCNQ2_MIP_22    | aaggagaggggagtgagctctcCTTCAGCTTCCCGATATCCGACGGTAGTGTaggaggactgagagcc    |
| KCNQ2_MIP_23    | gggtggcgtctcagctctcCTTCAGCTTCCCGATATCCGACGGTAGTGTgagacgtcactcccctc      |
| KCNQ2_MIP_24    | atgaaacaaatagttgaggaagctCTTCAGCTTCCCGATATCCGACGGTAGTGTggctctgtccatgc    |
| KCNQ2_MIP_25    | gaaatgcatggagacagaagccCTTCAGCTTCCCGATATCCGACGGTAGTGTtacttctcaactattgt   |
| KCNQ2_MIP_26    | gtacatgggcacggtgaccgCTTCAGCTTCCCGATATCCGACGGTAGTGTcctttgaaaaatacattt    |
| KCNQ2_MIP_27    | gccaccaagcaactgtttcatttCTTCAGCTTCCCGATATCCGACGGTAGTGTtcttctcctcgcagtc   |
| KCNQ2_MIP_28    | gccaggcactcaggactctgggCTTCAGCTTCCCGATATCCGACGGTAGTGTggtgctgtagaatctcca  |
| KCNQ2_MIP_29    | caagatgccctgcaattcatcagCTTCAGCTTCCCGATATCCGACGGTAGTGTggaacaaggctgtgctg  |
| KCNQ2_MIP_30    | gtctgggttgcctgaaggttCTTCAGCTTCCCGATATCCGACGGTAGTGTggagtgtgctgacct       |
| KCNQ2_MIP_31    | gtggtcagctgatctgtgggacCTTCAGCTTCCCGATATCCGACGGTAGTGTcctcaaggcaggcagg    |
| KCNQ2_MIP_32    | gcaaccttaccctcatcgggtCTTCAGCTTCCCGATATCCGACGGTAGTGTgtccagcctgcctcag     |
| KCNQ2_MIP_33    | caggcagtgaccagctcctgCTTCAGCTTCCCGATATCCGACGGTAGTGTaaaccacaatgaccacaact  |
| KCNQ2_MIP_34    | gtacttggcagagaaggggagCTTCAGCTTCCCGATATCCGACGGTAGTGTtgggttgggtgggtga     |
| KCNQ2_MIP_35    | atctcaggaagcgcaggctCTTCAGCTTCCCGATATCCGACGGTAGTGTgaccagactcctgctgctg    |
| KCNQ2_MIP_36    | ggggaggcacctggaagctgCTTCAGCTTCCCGATATCCGACGGTAGTGTttagacatcatggtgctc    |
| KCNQ2_MIP_37    | gtcagaggggggggaaggttCTTCAGCTTCCCGATATCCGACGGTAGTGTcggcggcagcaccgcaa     |
| KCNQ2_MIP_38    | aacaccagatagtcacgatttCTTCAGCTTCCCGATATCCGACGGTAGTGTgcaataaccacccccacca  |
| KCNQ2_MIP_39    | ggcgtggagtactctgtcggaCTTCAGCTTCCCGATATCCGACGGTAGTGTcctgtggctgtgctcct    |
| KCNQ2_MIP_40    | aggaacctggggcagggaacgCTTCAGCTTCCCGATATCCGACGGTAGTGTcctctctcggcacttc     |
| KCNQ2_MIP_41    | gctgtctgttttccaccatcaaCTTCAGCTTCCCGATATCCGACGGTAGTGTctgctgctgctggtg     |

|               |                                                                         |
|---------------|-------------------------------------------------------------------------|
| KCNQ2_MIP_42  | cgccgccccgcgaggtttCTTCAGCTTCCCGATATCCGACGGTAGTGTgggcccccgccactc         |
| KCNQ2_MIP_43  | gaagcccccaagcgcaacgcttCTTCAGCTTCCCGATATCCGACGGTAGTGTggctctggggctgg      |
| KCNQ2_MIP_44  | gctcaggctcagcggggcgcttCAGCTTCCCGATATCCGACGGTAGTGTggagtcggcgccggggg      |
| SLC2A1_MIP_1  | agcgatctcatcgaagtccCTTCAGCTTCCCGATATCCGACGGTAGTGTccttagggctgctggagca    |
| SLC2A1_MIP_2  | ccatcccctggggctgattcCTTCAGCTTCCCGATATCCGACGGTAGTGTctcctggtctgtcttca     |
| SLC2A1_MIP_3  | catcctggcttaggactttggaCTTCAGCTTCCCGATATCCGACGGTAGTGTtagtctcaggaaacttga  |
| SLC2A1_MIP_4  | atgaacatgggatggggcaggCTTCAGCTTCCCGATATCCGACGGTAGTGTgagacagtgggggtct     |
| SLC2A1_MIP_5  | atgaacatgggatggggcaggCTTCAGCTTCCCGATATCCGACGGTAGTGTgagacagtgggggtct     |
| SLC2A1_MIP_6  | gccgttcaggcttctcaaCTTCAGCTTCCCGATATCCGACGGTAGTGTctaccctggatgtctatct     |
| SLC2A1_MIP_7  | gagatatgcgagaaggcaggaaCTTCAGCTTCCCGATATCCGACGGTAGTGTaaagatggccacgatgct  |
| SLC2A1_MIP_8  | gagctatgcgagaaggcaggaaCTTCAGCTTCCCGATATCCGACGGTAGTGTaaagatggccacgatgct  |
| SLC2A1_MIP_9  | cagagacagctcagtgccaccCTTCAGCTTCCCGATATCCGACGGTAGTGTctccagaacctagcaact   |
| SLC2A1_MIP_10 | cagagacagctcagtgccaccCTTCAGCTTCCCGATATCCGACGGTAGTGTctccagaacctagcaact   |
| SLC2A1_MIP_11 | gagttgctaggttctggagagtCTTCAGCTTCCCGATATCCGACGGTAGTGTggcactgacgtgtctct   |
| SLC2A1_MIP_12 | gagttgctaggttctggagagtCTTCAGCTTCCCGATATCCGACGGTAGTGTggcactgacgtgtctct   |
| SLC2A1_MIP_13 | cagacaagaaactgttggggcCTTCAGCTTCCCGATATCCGACGGTAGTGTgccagtaagcaagact     |
| SLC2A1_MIP_14 | gagctttgcttactggccccCTTCAGCTTCCCGATATCCGACGGTAGTGTcaacagtttctctgtct     |
| SLC2A1_MIP_15 | acgaagcctgtggtcaggccCTTCAGCTTCCCGATATCCGACGGTAGTGTgccgtgcccagcagtagat   |
| SLC2A1_MIP_16 | cctgggcaccctgcaccagctCTTCAGCTTCCCGATATCCGACGGTAGTGTtctcgaaactggcgaagt   |
| SLC2A1_MIP_17 | cattcctgggctccgaggggcttCTTCAGCTTCCCGATATCCGACGGTAGTGTgactcagctctcaag    |
| SLC2A1_MIP_18 | cagaaaagatggccactgagaggCTTCAGCTTCCCGATATCCGACGGTAGTGTccacccatctgggact   |
| SLC2A1_MIP_19 | gtggccttttctgtaaccgCTTCAGCTTCCCGATATCCGACGGTAGTGTgtgatcaggaggttctcaaa   |
| SLC2A1_MIP_20 | cagtcttcttcttcttctcttCTTCAGCTTCCCGATATCCGACGGTAGTGTccagagcgtggtgagc     |
| SLC2A1_MIP_21 | aacaaaccacactgtatagcgtCTTCAGCTTCCCGATATCCGACGGTAGTGTccaacgatggcacag     |
| SLC2A1_MIP_22 | gtgccatcgttggcttgggaCTTCAGCTTCCCGATATCCGACGGTAGTGTtaacagttggtttgttc     |
| SLC2A1_MIP_23 | gtccgggactcccactgcgactCTTCAGCTTCCCGATATCCGACGGTAGTGTcccgggcccgcgact     |
| SLC2A1_MIP_24 | gagtcgcccggggccttctctCTTCAGCTTCCCGATATCCGACGGTAGTGTgtagggagtcgggga      |
| SLC2A1_MIP_25 | gcatcatctgcgacttctctctCTTCAGCTTCCCGATATCCGACGGTAGTGTgtgggtggggcactc     |
| SLC2A1_MIP_26 | gcatcatctgcgacttctctctCTTCAGCTTCCCGATATCCGACGGTAGTGTgtgggtggggcactc     |
| SLC2A1_MIP_27 | ccagccatcctatcgtctggtCTTCAGCTTCCCGATATCCGACGGTAGTGTgtgctaaagaactgctc    |
| SLC2A1_MIP_28 | actcttggcccggttctctctCTTCAGCTTCCCGATATCCGACGGTAGTGTgggtcagctcagctgtc    |
| SLC2A1_MIP_29 | cctgccctctcccactcccCTTCAGCTTCCCGATATCCGACGGTAGTGTctgtctgtagcatctct      |
| SLC2A1_MIP_30 | aacactgggggaagcaggggcCTTCAGCTTCCCGATATCCGACGGTAGTGTgtgatgagcaggaagcg    |
| SLC2A1_MIP_31 | ggactccatcatgggcaacaagCTTCAGCTTCCCGATATCCGACGGTAGTGTctagaactggggccttc   |
| SCN1A_MIP_1   | gtggacatggtcagatcagttCTTCAGCTTCCCGATATCCGACGGTAGTGTaacaatttgtaccaact    |
| SCN1A_MIP_2   | gcagctgtccaccttctatCTTCAGCTTCCCGATATCCGACGGTAGTGTaacaagcttctttacgta     |
| SCN1A_MIP_3   | gattggctgataggagacttCTTCAGCTTCCCGATATCCGACGGTAGTGTccacctttagtttttt      |
| SCN1A_MIP_4   | cgaaaacaagaggaaatctctCTTCAGCTTCCCGATATCCGACGGTAGTGTatttctttacaacgcg     |
| SCN1A_MIP_5   | gattgagggcggttcaagcCTTCAGCTTCCCGATATCCGACGGTAGTGTgactcctctctccactc      |
| SCN1A_MIP_6   | gccacaaccaaaactcagCTTCAGCTTCCCGATATCCGACGGTAGTGTgactcctgagtgaggatg      |
| SCN1A_MIP_7   | gttcaccacaaccaggaaggataCTTCAGCTTCCCGATATCCGACGGTAGTGTgactcctgagtgaggatg |
| SCN1A_MIP_8   | gcggtcatcctggagaacttctCTTCAGCTTCCCGATATCCGACGGTAGTGTccgactgtgacctataaa  |
| SCN1A_MIP_9   | gtctaaagtgaacatgtctctCTTCAGCTTCCCGATATCCGACGGTAGTGTactgagctccagggtt     |
| SCN1A_MIP_10  | ggcaacagcatgctgcttaCTTCAGCTTCCCGATATCCGACGGTAGTGTtctcctgctgttaacat      |
| SCN1A_MIP_11  | actcggaaacaggtgagggaCTTCAGCTTCCCGATATCCGACGGTAGTGTatgactaggaagagtaggag  |
| SCN1A_MIP_12  | gatcaaaaggagaaaggggaCTTCAGCTTCCCGATATCCGACGGTAGTGTtttctcactggttgatt     |
| SCN1A_MIP_13  | agttcagtacacacttcaCTTCAGCTTCCCGATATCCGACGGTAGTGTtttcagcttctcactttaa     |
| SCN1A_MIP_14  | gatttgggtgtcattctctCTTCAGCTTCCCGATATCCGACGGTAGTGTccagagtaaatgtgac       |
| SCN1A_MIP_15  | cattcctgaaattgttctgtaCTTCAGCTTCCCGATATCCGACGGTAGTGTgactcctgcaaaaatgg    |
| SCN1A_MIP_16  | gactcgtaacagacaagtCTTCAGCTTCCCGATATCCGACGGTAGTGTgactccttcaaaaaac        |
| SCN1A_MIP_17  | ataaagatgcttacctcaaaCTTCAGCTTCCCGATATCCGACGGTAGTGTaaagttttgtttgtat      |
| SCN1A_MIP_18  | aaaccgaaaagcctataaccCTTCAGCTTCCCGATATCCGACGGTAGTGTgaaaaaatgtacaaaagg    |
| SCN1A_MIP_19  | ggaccaaaagatgataaaataCTTCAGCTTCCCGATATCCGACGGTAGTGTgagagaaaactcca       |
| SCN1A_MIP_20  | caaccagcagaaaagaagataCTTCAGCTTCCCGATATCCGACGGTAGTGTcctttgtagtggaac      |
| SCN1A_MIP_21  | attattcagcttctgctgctCTTCAGCTTCCCGATATCCGACGGTAGTGTcagagaaaatagtttcac    |
| SCN1A_MIP_22  | gaaagaaatgagactgctgaCTTCAGCTTCCCGATATCCGACGGTAGTGTtctggctaatttcagcat    |
| SCN1A_MIP_23  | gcattcaaacaccctaatacaCTTCAGCTTCCCGATATCCGACGGTAGTGTaccagttgtggttgaat    |
| SCN1A_MIP_24  | ccatcatgaatgtcttctgctCTTCAGCTTCCCGATATCCGACGGTAGTGTaaaaaagaatggaagacc   |
| SCN1A_MIP_25  | actgaccaatgaaactgcactCTTCAGCTTCCCGATATCCGACGGTAGTGTtaccgttcttctttttc    |
| SCN1A_MIP_26  | acagcaaatgcttgggttaCTTCAGCTTCCCGATATCCGACGGTAGTGTgaacatttctctgtaata     |
| SCN1A_MIP_27  | acctgtcagcatattcaacCTTCAGCTTCCCGATATCCGACGGTAGTGTgacaaaaaatgaaacgat     |
| SCN1A_MIP_28  | gcttctaaaatgggtggcatCTTCAGCTTCCCGATATCCGACGGTAGTGTttttgaaagctaataatgtg  |
| SCN1A_MIP_29  | gccttctccacattgattgtCTTCAGCTTCCCGATATCCGACGGTAGTGTcaccttttctaatctcac    |
| SCN1A_MIP_30  | gaggaaaaaatggtggaaccCTTCAGCTTCCCGATATCCGACGGTAGTGTaaaaagacaagacaaggac   |
| SCN1A_MIP_31  | gctacctctgatgagctactCTTCAGCTTCCCGATATCCGACGGTAGTGTgactcactcaaatgaaa     |

|                |                                                                        |
|----------------|------------------------------------------------------------------------|
| SCN1A_MIP_32   | cctgtagaagaacacccgctCTTCAGCTTCCCGATATCCGACGGTAGTGTtagtaataatcctttctgg  |
| SCN1A_MIP_33   | gggggttttatgaatgacatgCTTCAGCTTCCCGATATCCGACGGTAGTGTataccttcccacacat    |
| SCN1A_MIP_34   | gtgactgtaccaattgctgtagCTTCAGCTTCCCGATATCCGACGGTAGTGTgggaaagatctgacta   |
| SCN1A_MIP_35   | gtttcctaataagagactgtgCTTCAGCTTCCCGATATCCGACGGTAGTGTccactgttagttccatt   |
| SCN1A_MIP_36   | caagaagacagttgatgtccCTTCAGCTTCCCGATATCCGACGGTAGTGTaaattgctgtgtaggga    |
| SCN1A_MIP_37   | ccttaaaacaacaaaaaCTTCAGCTTCCCGATATCCGACGGTAGTGTcacataagctactcctttg     |
| SCN1A_MIP_38   | ggccttgctctgagctcatCTTCAGCTTCCCGATATCCGACGGTAGTGTcatcaagtttagaacctag   |
| SCN1A_MIP_39   | gcggaacacaatcaggaaggaCTTCAGCTTCCCGATATCCGACGGTAGTGTgcatatctaagtgggtac  |
| SCN1A_MIP_40   | ggggagtggatagagaccatgtgCTTCAGCTTCCCGATATCCGACGGTAGTGTgctggcatcagctctt  |
| SCN1A_MIP_41   | gttgccaagattttgccaCTTCAGCTTCCCGATATCCGACGGTAGTGTcaatctttgtagctttacc    |
| SCN1A_MIP_42   | atttaaccctgcttggccCTTCAGCTTCCCGATATCCGACGGTAGTGTatgcttttaagaatcataca   |
| SCN1A_MIP_43   | ccgtcaaagatattccagccCTTCAGCTTCCCGATATCCGACGGTAGTGTccctgattgtagaaggtt   |
| SCN1A_MIP_44   | cctgtagaacttgactcgtCTTCAGCTTCCCGATATCCGACGGTAGTGTaattttgtttgatcttagg   |
| SCN1A_MIP_45   | gcttatgctattttcccaCTTCAGCTTCCCGATATCCGACGGTAGTGTatccatggcaataatttc     |
| SCN1A_MIP_46   | ggtcaacaatgggtccatcaCTTCAGCTTCCCGATATCCGACGGTAGTGTctaacaacattacccttc   |
| SCN1A_MIP_47   | ggccatcaccatctgtattgctCTTCAGCTTCCCGATATCCGACGGTAGTGTatccaggcagaatgcc   |
| SCN1A_MIP_48   | cacacacattattcatatcaCTTCAGCTTCCCGATATCCGACGGTAGTGTggagaacagctccaga     |
| SCN1A_MIP_49   | gaaagtcctaggaacgtggCTTCAGCTTCCCGATATCCGACGGTAGTGTgtttgaaatgagacaat     |
| SCN1A_MIP_50   | atccttcccaaggaacgaCTTCAGCTTCCCGATATCCGACGGTAGTGTgtttgctgtcatattgct     |
| SCN1A_MIP_51   | cactgccagcatcgggatCTTCAGCTTCCCGATATCCGACGGTAGTGTtagtagcttacttatta      |
| SCN1A_MIP_52   | ccagcgaatgggaagatgacCTTCAGCTTCCCGATATCCGACGGTAGTGTatgatgagcacagacctt   |
| SCN1A_MIP_53   | ccacggatgctcaacaagactaCTTCAGCTTCCCGATATCCGACGGTAGTGTcggctcctgtatcctc   |
| SCN1A_MIP_54   | ccctattttaccaagggcaCTTCAGCTTCCCGATATCCGACGGTAGTGTtattctgtatgaatctgga   |
| SCN1A_MIP_55   | atgctgtcctcagattcagatCTTCAGCTTCCCGATATCCGACGGTAGTGTtctctccatgttttaatt  |
| SCN1A_MIP_56   | aggaggaaaggtttctctcCTTCAGCTTCCCGATATCCGACGGTAGTGTccttaagttagtccaa      |
| SCN1A_MIP_57   | gcctgctatattgaagaaatCTTCAGCTTCCCGATATCCGACGGTAGTGTtcttttctctccgatt     |
| SCN1A_MIP_58   | gcaacggcaactcctcagaCTTCAGCTTCCCGATATCCGACGGTAGTGTtctctgtgagatgatttc    |
| SCN1A_MIP_59   | cctcgtaggccatggccaccCTTCAGCTTCCCGATATCCGACGGTAGTGTgataaaagctcagtgccatg |
| SCN1A_MIP_60   | gccacctgggaagacagaaCTTCAGCTTCCCGATATCCGACGGTAGTGTtttgagacattactgtgc    |
| SCN1A_MIP_61   | actttcaattactcatgtgtctCTTCAGCTTCCCGATATCCGACGGTAGTGTtagtagaatgagccaa   |
| SCN1A_MIP_62   | cagctttcacacatatatccCTTCAGCTTCCCGATATCCGACGGTAGTGTgagtggtctttagtt      |
| SCN1A_MIP_63   | aatcccaattatggctacacaaCTTCAGCTTCCCGATATCCGACGGTAGTGTaatcttctgactaggca  |
| SCN1A_MIP_64   | atgaacatttgattttaaCTTCAGCTTCCCGATATCCGACGGTAGTGTacatacaaatatacacag     |
| SCN1A_MIP_65   | gtatattgtatgtacacataCTTCAGCTTCCCGATATCCGACGGTAGTGTgcaaatgttcatcata     |
| SCN1A_MIP_66   | caaggaagcattgggtggagCTTCAGCTTCCCGATATCCGACGGTAGTGTaaggaaatgtacatacaat  |
| SCN1A_MIP_67   | atgaaactgtctttgagttgacCTTCAGCTTCCCGATATCCGACGGTAGTGTaaattgggctcagctg   |
| SCN1A_MIP_68   | cctgaaagaaagaagtcttactCTTCAGCTTCCCGATATCCGACGGTAGTGTtctcaggtgccat      |
| SCN1A_MIP_69   | gaaaaccattgtggagccctgCTTCAGCTTCCCGATATCCGACGGTAGTGTtctcactagctgtgca    |
| SCN1A_MIP_70   | gagttcacacacaacacaaaCTTCAGCTTCCCGATATCCGACGGTAGTGTccgtctcattatcaacc    |
| SCN1A_MIP_71   | gcaaggttagataatgagacggCTTCAGCTTCCCGATATCCGACGGTAGTGTttttgtttgtgtgga    |
| SCN1A_MIP_72   | agaatccccttgcaataattttCTTCAGCTTCCCGATATCCGACGGTAGTGTgcataagcactgatgga  |
| SCN1A_MIP_73   | atccatggaactggctcgtCTTCAGCTTCCCGATATCCGACGGTAGTGTaaactgttactttatcaa    |
| SCN1A_MIP_74   | gcatgctgaataatgtagttaCTTCAGCTTCCCGATATCCGACGGTAGTGTcagttcaaaatcccaaa   |
| SCN1A_MIP_75   | gtgcaatatttgacaaactgCTTCAGCTTCCCGATATCCGACGGTAGTGTtatccctgaaatttggt    |
| SCN1A_MIP_76   | ggaagatggccttcccttaCTTCAGCTTCCCGATATCCGACGGTAGTGTtctcagatcatgtacaaat   |
| SCN1A_MIP_77   | cacctctgcctgtacattCTTCAGCTTCCCGATATCCGACGGTAGTGTtattatgaaagtaacaga     |
| SCN1A_MIP_78   | cactatttgctttgggccaCTTCAGCTTCCCGATATCCGACGGTAGTGTcaaaatagctgataaaaa    |
| SCN1A_MIP_79   | catttattatgagacattctcCTTCAGCTTCCCGATATCCGACGGTAGTGTagaatctctgctgct     |
| SCN1A_MIP_80   | catctgtcatctgcacattCTTCAGCTTCCCGATATCCGACGGTAGTGTtctcatctttttgtctg     |
| SCN1A_MIP_81   | agcaaacagtctgtaccaCTTCAGCTTCCCGATATCCGACGGTAGTGTcatgttcatgacaagaatt    |
| SCN1A_MIP_82   | actttgagatgttctatgaggttCTTCAGCTTCCCGATATCCGACGGTAGTGTggaattttcttttt    |
| SCN1A_MIP_83   | gttaaatatgtaataaagatcatCTTCAGCTTCCCGATATCCGACGGTAGTGTatattgaattctaag   |
| SCN1A_MIP_84   | gaaagtttaaatagctcaggcatCTTCAGCTTCCCGATATCCGACGGTAGTGTatgcacagcactgtgg  |
| SCN1A_MIP_85   | aacactcaaatgagaacaggaaggCTTCAGCTTCCCGATATCCGACGGTAGTGTcaaaaattattgactt |
| GRIN2B_MIP_001 | ccctatacagatgtccttctgCTTCAGCTTCCCGATATCCGACGGTAGTGTctaactctctgttccc    |
| GRIN2B_MIP_002 | gtgtgcctaacaacaaaacccaCTTCAGCTTCCCGATATCCGACGGTAGTGTggggcgctgaaagcc    |
| GRIN2B_MIP_003 | cccaaaagtgggatgaaaggtCTTCAGCTTCCCGATATCCGACGGTAGTGTatgaaagggccagacca   |
| GRIN2B_MIP_004 | acgaccagtcttgctccatCTTCAGCTTCCCGATATCCGACGGTAGTGTttgccaacaacagctcctca  |
| GRIN2B_MIP_005 | catgaatcggcccttcttcaCTTCAGCTTCCCGATATCCGACGGTAGTGTgctgagcatgtaccgc     |
| GRIN2B_MIP_006 | gcccctacgcccacatgtttgCTTCAGCTTCCCGATATCCGACGGTAGTGTccaagaagaaccggac    |
| GRIN2B_MIP_007 | cagttcctgaggagttgtccCTTCAGCTTCCCGATATCCGACGGTAGTGTtaggtgctgaggagtct    |
| GRIN2B_MIP_008 | cggtgacgtcaaacctccacCTTCAGCTTCCCGATATCCGACGGTAGTGTacggtgacgggtcagaac   |
| GRIN2B_MIP_009 | gttggtcaggttcttctccaaCTTCAGCTTCCCGATATCCGACGGTAGTGTtctgcaagcctcacacc   |
| GRIN2B_MIP_010 | caactctgcccagctgtcccCTTCAGCTTCCCGATATCCGACGGTAGTGTgaggaggccctgtacca    |
| GRIN2B_MIP_011 | gtgagttctcttgttgggaactCTTCAGCTTCCCGATATCCGACGGTAGTGTttgtcggctccc       |

|                |                                                                        |
|----------------|------------------------------------------------------------------------|
| GRIN2B_MIP_012 | gtagacctgaccgacatctacaagCTTCAGCTTCCCGATATCCGACGGTAGTGTgtagggcctaccgtcg |
| GRIN2B_MIP_013 | ccttatattgctgcttacgctcCTTCAGCTTCCCGATATCCGACGGTAGTGTgtagcccttctgttc    |
| GRIN2B_MIP_014 | cagcctgaagaagcggcctgctcCTTCAGCTTCCCGATATCCGACGGTAGTGTaagagcaccgtaca    |
| GRIN2B_MIP_015 | gcttctgctgatggacctggaCTTCAGCTTCCCGATATCCGACGGTAGTGTgtgagatgctcagagaca  |
| GRIN2B_MIP_016 | gacatggcctccctcctcCTTCAGCTTCCCGATATCCGACGGTAGTGTgtgtaccaagatcactacca   |
| GRIN2B_MIP_017 | gtttaggatttgtagtcagaatgCTTCAGCTTCCCGATATCCGACGGTAGTGTctatggggccgggtgt  |
| GRIN2B_MIP_018 | gccctgtgaggagaacctctcCTTCAGCTTCCCGATATCCGACGGTAGTGTgtaacctgtctgggtgga  |
| GRIN2B_MIP_019 | gggggagttcattacagactggcCTTCAGCTTCCCGATATCCGACGGTAGTGTggatgactccctcgga  |
| GRIN2B_MIP_020 | caacctgaacaacacactCTTCAGCTTCCCGATATCCGACGGTAGTGTgtgtttttgtgtcatt       |
| GRIN2B_MIP_021 | atgaggctgagagccatggcCTTCAGCTTCCCGATATCCGACGGTAGTGTaacaagcttaggcattta   |
| GRIN2B_MIP_022 | aacaccttttctattggcagttCTTCAGCTTCCCGATATCCGACGGTAGTGTggctcactgctttgt    |
| GRIN2B_MIP_023 | caggaaaggagcagagaaaaggCTTCAGCTTCCCGATATCCGACGGTAGTGTcaatgtccagctggctg  |
| GRIN2B_MIP_024 | gccaatggtcaccagcttcaCTTCAGCTTCCCGATATCCGACGGTAGTGTatgggaccttcccttct    |
| GRIN2B_MIP_025 | gggaaggcttcttccacCTTCAGCTTCCCGATATCCGACGGTAGTGTtctaaaattcctcattgga     |
| GRIN2B_MIP_026 | atatttctctgtgctcggCTTCAGCTTCCCGATATCCGACGGTAGTGTgtgagaaacagatcaagga    |
| GRIN2B_MIP_027 | cagaaatgcatgctcatcagggaCTTCAGCTTCCCGATATCCGACGGTAGTGTtccatctcccctctgt  |
| GRIN2B_MIP_028 | cactgacaccatgatcttgaCTTCAGCTTCCCGATATCCGACGGTAGTGTgagattcaaatgagctc    |
| GRIN2B_MIP_029 | gcctctttgctgtcattctcCTTCAGCTTCCCGATATCCGACGGTAGTGTccagagcctgtggacc     |
| GRIN2B_MIP_030 | cacagggtagctcctcctcaCTTCAGCTTCCCGATATCCGACGGTAGTGTaaacacagaccagga      |
| GRIN2B_MIP_031 | acatcatcaccatcagctcagCTTCAGCTTCCCGATATCCGACGGTAGTGTaaaaactgggaagtgcag  |
| GRIN2B_MIP_032 | gtcttgtagtactcagccctCTTCAGCTTCCCGATATCCGACGGTAGTGTaattcgaattctttgct    |
| GRIN2B_MIP_033 | attgatggtgagtgagccactCTTCAGCTTCCCGATATCCGACGGTAGTGTtccaccagcaaacctc    |
| GRIN2B_MIP_034 | aggaaacatcggaggtgctcCTTCAGCTTCCCGATATCCGACGGTAGTGTaacctgatagctgtatt    |
| GRIN2B_MIP_035 | gatgtcaatacagaacccttgaCTTCAGCTTCCCGATATCCGACGGTAGTGTcagccctgtggcac     |
| GRIN2B_MIP_036 | ggttaccatggcaagcatgCTTCAGCTTCCCGATATCCGACGGTAGTGTttgtttcttaattggcta    |
| GRIN2B_MIP_037 | caaagcaggccccctcacagCTTCAGCTTCCCGATATCCGACGGTAGTGTttttgatgaaccggct     |
| GRIN2B_MIP_038 | gctcagatggtcatcctctgCTTCAGCTTCCCGATATCCGACGGTAGTGTaaagtattgagaggatgc   |
| GRIN2B_MIP_039 | gtgacctggaggaggaccCTTCAGCTTCCCGATATCCGACGGTAGTGTggtttctgattctgtgtt     |
| GRIN2B_MIP_040 | ccctcaaaagtacattgatcaCTTCAGCTTCCCGATATCCGACGGTAGTGTtctactctcttctca     |
| GRIN2B_MIP_041 | aggaattgtcctcagtgaaagCTTCAGCTTCCCGATATCCGACGGTAGTGTactgtctgtctcagcc    |
| GRIN2B_MIP_042 | gtgattatggcaattcactctcCTTCAGCTTCCCGATATCCGACGGTAGTGTgccctctgtccacac    |
| GRIN2B_MIP_043 | gcttctgacatgctgtgagcCTTCAGCTTCCCGATATCCGACGGTAGTGTtctgtggcaggggatac    |
| GRIN2B_MIP_044 | acagtaagaagaatgatggggcCTTCAGCTTCCCGATATCCGACGGTAGTGTagtgggaaactccgcag  |
| GRIN2B_MIP_045 | caaggaagaagccactacaCTTCAGCTTCCCGATATCCGACGGTAGTGTcattgagaatagcttggg    |
| GRIN2B_MIP_046 | atgttgagcattacggaagctcCTTCAGCTTCCCGATATCCGACGGTAGTGTgaggacctcctagctc   |
| GRIN2B_MIP_047 | caccacctatttccctggctCTTCAGCTTCCCGATATCCGACGGTAGTGTcctttttgtctgttct     |
| GRIN2B_MIP_048 | atggcttctggtctgtgtatcCTTCAGCTTCCCGATATCCGACGGTAGTGTgcacaaacctcaggcc    |
| GRIN2B_MIP_049 | atcctcgattcattcagcacCTTCAGCTTCCCGATATCCGACGGTAGTGTgggtgaaactgtagccat   |
| GRIN2B_MIP_050 | gtcgaagtgccacagaggaCTTCAGCTTCCCGATATCCGACGGTAGTGTagacatgagatcacagatgc  |
| GRIN2B_MIP_051 | catcaaggatgccacagagaaaCTTCAGCTTCCCGATATCCGACGGTAGTGTagtgtcttcccaagt    |
| GRIN2B_MIP_052 | aagaggctagatactcaattcaCTTCAGCTTCCCGATATCCGACGGTAGTGTcgccaaccaaccag     |

## Supplementary References

1. Capelli, L. P. *et al.* Deletion of the RMGA and CHD2 genes in a child with epilepsy and mental deficiency. *Eur. J. Med. Genet.* **55**, 132-134 (2012).
2. Heinzen, E. L. *et al.* Rare deletions at 16p13.11 predispose to a diverse spectrum of sporadic epilepsy syndromes. *Am. J. Hum. Genet.* **86**, 707-718 (2010).
3. Mefford, H. C. *et al.* Rare copy number variants are an important cause of epileptic encephalopathies. *Ann. Neurol.* **70**, 974-985 (2011).
4. Mefford, H. C. *et al.* Genome-wide copy number variation in epilepsy: novel susceptibility loci in idiopathic generalized and focal epilepsies. *PLoS Genet.* **6**, e1000962 (2010).
5. Chen, J., Bardes, E. E., Aronow, B. J. & Jegga, A. G. ToppGene Suite for gene list enrichment analysis and candidate gene prioritization. *Nucleic Acids Res.* **37**, W305-11 (2009).
6. Tranchevent, L. C. *et al.* ENDEAVOUR update: a web resource for gene prioritization in multiple species. *Nucleic Acids Res.* **36**, W377-84 (2008).
7. Szklarczyk, D. *et al.* The STRING database in 2011: functional interaction networks of proteins, globally integrated and scored. *Nucleic Acids Res.* **39**, D561-8 (2011).
8. Thierry, G. *et al.* Molecular characterization of 1q44 microdeletion in 11 patients reveals three candidate genes for intellectual disability and seizures. *Am. J. Med. Genet. A.* **158A**, 1633-1640 (2012).
9. Tokuda, S. *et al.* A novel Akt3 mutation associated with enhanced kinase activity and seizure susceptibility in mice. *Hum. Mol. Genet.* **20**, 988-999 (2011).
10. Katoh, Y. *et al.* The clavesin family, neuron-specific lipid- and clathrin-binding Sec14 proteins regulating lysosomal morphology. *J. Biol. Chem.* **284**, 27646-27654 (2009).
11. Hruska, M. & Dalva, M. B. Ephrin regulation of synapse formation, function and plasticity. *Mol. Cell. Neurosci.* **50**, 35-44 (2012).
12. Wu, F., Mattson, M. P. & Yao, P. J. Neuronal activity and the expression of clathrin-assembly protein AP180. *Biochem. Biophys. Res. Commun.* **402**, 297-300 (2010).
13. Li, K. X. *et al.* Neuregulin 1 regulates excitability of fast-spiking neurons through Kv1.1 and acts in epilepsy. *Nat. Neurosci.* **15**, 267-273 (2011).
14. Yu, Y. X. *et al.* Syntaxin 1A promotes the endocytic sorting of EAAC1 leading to inhibition of glutamate transport. *J. Cell. Sci.* **119**, 3776-3787 (2006).
15. Van Houdt, J. K. *et al.* Heterozygous missense mutations in SMARCA2 cause Nicolaides-Baraitser syndrome. *Nat. Genet.* **44**, 445-9, S1 (2012).
16. Poduri, A. *et al.* Somatic activation of AKT3 causes hemispheric developmental brain malformations. *Neuron* **74**, 41-48 (2012).
